# Supplementary material for: Control of Selectivity in Palladium-Catalyzed Oxidative Carbocyclization/Borylation of Allenynes
Source: PubMed Central journal article supplement (PMC3734627; doi:10.1002/anie.201301167), 2013-05-17

Supporting Information

© Wiley-VCH 2013

69451 Weinheim, Germany

**Control of Selectivity in Palladium-Catalyzed Oxidative  
Carbocyclization/Borylation of Allenynes\*\***

*Youqian Deng, Teresa Bartholomeyzik, and Jan-E. Bäckvall\**

anie\_201301167\_sm\_miscellaneous\_information.pdf

## Contents

|                                                                              |     |
|------------------------------------------------------------------------------|-----|
| General remarks                                                              | S2  |
| Preparation of allenynes                                                     | S3  |
| General procedure for selective formation of borylated trienes <b>4</b>      | S3  |
| General procedure for selective formation of borylated vinylallenes <b>5</b> | S8  |
| Explanation for the formation of <b>4f'</b> from <b>4f</b>                   | S12 |
| Application of product <b>5d</b>                                             | S13 |
| Kinetic isotope effect experiments                                           | S14 |
| Alternative mechanism                                                        | S21 |
| References                                                                   | S21 |
| Copies of spectra                                                            | S22 |

## Experimental Section

### *General remarks*

Unless otherwise noted, all reagents were used as received from the commercial suppliers. B<sub>2</sub>pin<sub>2</sub> was commercially available from Combi-Blocks. Pd(OAc)<sub>2</sub> was obtained from Pressure Chemicals and used without further purification. Palladium-catalyzed cyclizations were performed without any efforts to exclude moisture. Dry solvents (Et<sub>2</sub>O, THF) were obtained from a VAC Solvent Purifier. Reactions were monitored using thin-layer chromatography (SiO<sub>2</sub>). TLC plates were visualized with UV light (254 nm) or KMnO<sub>4</sub> stain. Flash chromatography was carried out with 60Å (particle size 35-70 μm) normal flash silica gel. NMR spectra were recorded at 400 MHz (<sup>1</sup>H) or 500 MHz (<sup>1</sup>H) and at 100 MHz (<sup>13</sup>C) or 125 MHz (<sup>13</sup>C), respectively. Chemical shifts (δ) are reported in ppm, using the residual solvent peak in CDCl<sub>3</sub> (δ<sub>H</sub> = 7.26 and δ<sub>C</sub> = 77.0 ppm) as internal standard, and coupling constants (*J*) are given in Hz. HRMS were recorded using ESI-TOF techniques.

### General procedure for preparation of starting materials

All bromoallenes were prepared according to the procedure published by Landor<sup>1a</sup> with minor modifications.<sup>1b</sup>

Dimethyl propargylmalonate is commercially available from Aldrich. Other alkyl substituted dimethyl propargylmalonates were prepared as described in the literature.<sup>2</sup>

Allenynes **1a-g** were prepared as previously described.<sup>3</sup>

### General procedure for oxidative carbocyclization/borylation for the formation of trienes **4**

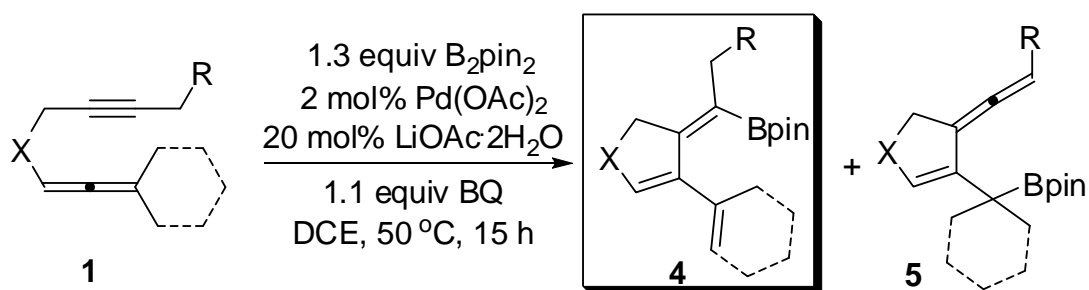

Representative procedure A for the synthesis of **4**. (*E*)-dimethyl 3-(prop-1-en-2-yl)-4-(1-(4,4,5,5-tetramethyl-1,3,2-dioxaborolan-2-yl)-propylidene)cyclopent-2-ene-1,1-dicarboxylate (**4a**)

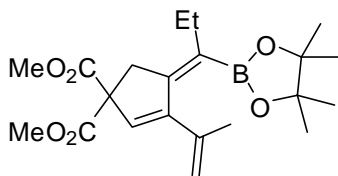

To a mixture of B<sub>2</sub>pin<sub>2</sub> (33.1 mg, 0.13 mmol), BQ (12.2 mg, 0.11 mmol), Pd(OAc)<sub>2</sub> (0.5 mg, 0.002 mmol), and LiOAc·2H<sub>2</sub>O (1.8 mg, 0.02 mmol) were added **1a** (26.0 mg, 0.10 mmol) and 0.5 mL of DCE at rt. The reaction was stirred at 50 °C for 15 h. After the reaction was complete as monitored by TLC, evaporation and column chromatography on silica gel (pentane/ethyl acetate = 10/1) afforded **4a** (27.9 mg,

73%) as a liquid;  $^1\text{H}$  NMR (500 MHz,  $\text{CDCl}_3$ ):  $\delta$  5.93 (s, 1H), 5.02-5.00 (m, 2H), 3.72 (s, 6H), 3.20 (s, 2H), 2.19 (q,  $J = 7.5$  Hz, 2H), 1.95 (s, 3H), 1.26 (s, 12H), 1.02 (t,  $J = 7.5$  Hz, 3H);  $^{13}\text{C}$  NMR (125 MHz,  $\text{CDCl}_3$ ):  $\delta$  171.1, 151.1, 147.9, 139.8, 129.1, 116.6, 83.3, 63.0, 52.9, 37.5, 27.0, 25.2, 23.8, 13.4; HRMS (ESI): calc. for  $\text{C}_{21}\text{H}_{31}\text{BNaO}_6$   $[\text{M}+\text{Na}]^+$ : 413.2110; found: 413.2113.

*(E)*-dimethyl 3-(prop-1-en-2-yl)-4-(1-(4,4,5,5-tetramethyl-1,3,2-dioxaborolan-2-yl)ethylidene)cyclopent-2-ene-1,1-dicarboxylate (**4b**).<sup>3b</sup>

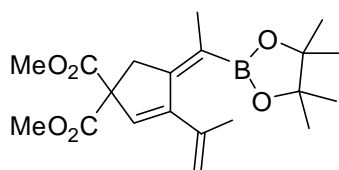

92% isolated yield, solid.  $^1\text{H}$  NMR (400 MHz,  $\text{CDCl}_3$ ):  $\delta$  5.91 (s, 1H), 5.01-4.96 (m, 2H), 3.72 (s, 6H), 3.16 (s, 2H), 1.95 (s, 3H), 1.78 (s, 3H), 1.24 (s, 12H).

Compound **4c** and **4c'** were obtained as an inseparable mixture.

*(E)*-dimethyl 3-((*Z*)-but-2-en-2-yl)-4-(1-(4,4,5,5-tetramethyl-1,3,2-dioxaborolan-2-yl)ethylidene)cyclopent-2-ene-1,1-dicarboxylate (**Z-4c**)

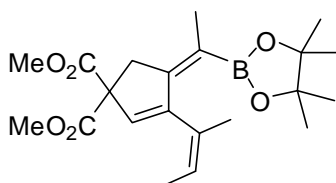

Liquid;  $^1\text{H}$  NMR (500 MHz,  $\text{CDCl}_3$ ):  $\delta$  5.81 (d,  $J = 0.5$  Hz, 1H), 5.37 (qt,  $J_1 = 6.5$  Hz,  $J_2 = 1.5$  Hz, 1H), 3.71 (s, 6H), 3.14 (s, 2H), 1.84 (d,  $J = 1.5$  Hz, 3H), 1.76 (s, 3H), 1.45 (dd,  $J_1 = 6.5$  Hz,  $J_2 = 1.5$  Hz, 3H), 1.24 (s, 12H); HRMS (ESI): calc. for  $\text{C}_{21}\text{H}_{31}\text{BNaO}_6$   $[\text{M}+\text{Na}]^+$ : 413.2110; found: 413.2116.

*(E)*-dimethyl 3-(but-1-en-2-yl)-4-(1-(4,4,5,5-tetramethyl-1,3,2-dioxaborolan-2-yl)ethylidene)cyclopent-2-ene-1,1-dicarboxylate (**4c'**)

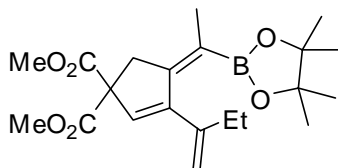

Liquid;  $^1\text{H}$  NMR (500 MHz,  $\text{CDCl}_3$ ):  $\delta$  5.89 (s, 1H), 4.990 (s, 1H), 4.989 (s, 1H), 3.71 (s, 6H), 3.16 (s, 2H), 2.26 (qt,  $J_1 = 7.5$  Hz,  $J_2 = 1.5$  Hz, 2H), 1.76 (s, 3H), 1.02 (t,  $J = 7.5$  Hz, 3H); HRMS (ESI): calc. for  $\text{C}_{21}\text{H}_{31}\text{BNaO}_6$   $[\text{M}+\text{Na}]^+$ : 413.2110; found: 413.2116.

*(E)*-dimethyl 3-(prop-1-en-2-yl)-4-(1-(4,4,5,5-tetramethyl-1,3,2-dioxaborolan-2-yl)-hexylidene)cyclopent-2-ene-1,1-dicarboxylate (**4d**)

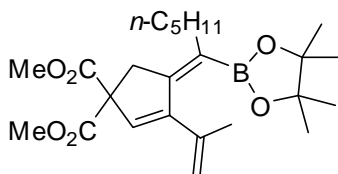

81% isolated yield, liquid.  $^1\text{H}$  NMR (400 MHz,  $\text{CDCl}_3$ ):  $\delta$  5.92 (s, 1H), 5.01-4.99 (m, 2H), 3.72 (s, 6H), 3.19 (s, 2H), 2.18-2.11 (m, 2H), 1.95 (s, 3H), 1.42-1.35 (m, 2H), 1.34-1.26 (m, 4H), 1.25 (s, 12H), 0.88 (t,  $J = 6.8$  Hz, 3H);  $^{13}\text{C}$  NMR (100 MHz,  $\text{CDCl}_3$ ):  $\delta$  171.1, 151.1, 148.0, 139.8, 129.0, 116.5, 83.3, 63.0, 52.8, 37.7, 34.1, 32.0, 28.6, 25.2, 25.0, 23.8, 22.5, 14.0; HRMS (ESI): calc. for  $\text{C}_{24}\text{H}_{37}\text{BNaO}_6$   $[\text{M}+\text{Na}]^+$ : 455.2580; found: 455.2577.

$[D_2]$ -*(E)*-dimethyl 3-(prop-1-en-2-yl)-4-(1-(4,4,5,5-tetramethyl-1,3,2-dioxaborolan-2-yl) hexylidene)cyclopent-2-ene-1,1-dicarboxylate ( $[D_2]$ -**4d**)

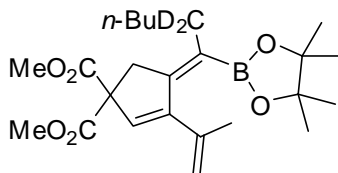

84% isolated yield (Scheme 3b), liquid.  $^1\text{H}$  NMR (400 MHz,  $\text{CDCl}_3$ ):  $\delta$  5.91 (s, 1H), 5.00-4.98 (m, 2H), 3.70 (s, 6H), 3.18 (s, 2H), 1.93 (t,  $J = 1.2$  Hz, 3H), 1.40-1.34 (m, 2H), 1.33-1.25 (m, 4H), 1.23 (s, 12H), 0.87 (t,  $J = 7.2$  Hz, 3H);  $^{13}\text{C}$  NMR (100 MHz,  $\text{CDCl}_3$ ):  $\delta$  171.0, 151.1, 148.0, 139.8, 129.0, 116.5, 83.2, 62.9, 52.8, 37.7, 31.9, 28.4,

25.2, 24.9, 23.7, 22.5, 13.9; HRMS (ESI): calc. for  $C_{24}H_{35}BD_2NaO_6$   $[M+Na]^+$ : 457.2705; found: 457.2706.

Compound **4e** and **4e'** were obtained as an inseparable mixture.

(*E*)-dimethyl 3-((*Z*)-but-2-en-2-yl)-4-(1-(4,4,5,5-tetramethyl-1,3,2-dioxaborolan-2-yl)-hexylidene)cyclopent-2-ene-1,1-dicarboxylate (**Z-4e**)

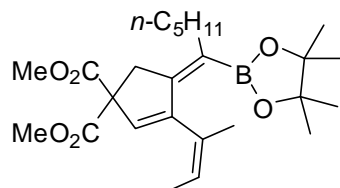

Liquid; <sup>1</sup>H NMR (500 MHz, CDCl<sub>3</sub>): δ 5.82 (s, 1H), 5.37 (qq,  $J_1 = 6.5$  Hz,  $J_2 = 1.5$  Hz, 1H), 3.72 (s, 6H), 3.18 (s, 2H), 2.16-2.10 (m, 2H), 1.86 (t,  $J = 6.5$  Hz, 3H), 1.45 (dq,  $J_1 = 6.5$  Hz,  $J_2 = 1.5$  Hz, 3H), 1.42-1.36 (m, 2H), 1.34-1.26 (m, 4H), 1.25 (s, 12H), 0.88 (t,  $J = 6.8$  Hz, 3H); HRMS (ESI): calc. for  $C_{25}H_{39}BNaO_6$   $[M+Na]^+$ : 469.2736; found: 469.2735.

(*E*)-dimethyl 3-cyclohexenyl-4-(1-(4,4,5,5-tetramethyl-1,3,2-dioxaborolan-2-yl)-hexylidene)cyclopent-2-ene-1,1-dicarboxylate (**4f**)

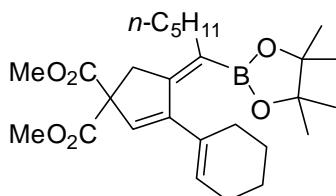

28% isolated yield, liquid. <sup>1</sup>H NMR (500 MHz, CDCl<sub>3</sub>): δ 5.91 (s, 1H), 5.77-5.72 (m, 1H), 3.72 (s, 6H), 3.19 (s, 2H), 2.22-2.14 (m, 4H), 2.11-2.04 (m, 2H), 1.70-1.64 (m, 2H), 1.63-1.55 (m, 2H), 1.44-1.36 (m, 2H), 1.34-1.26 (m, 4H), 1.25 (s, 12H), 0.89 (t,  $J = 7.0$  Hz, 3H); <sup>13</sup>C NMR (125 MHz, CDCl<sub>3</sub>): δ 171.2, 151.7, 147.6, 133.6, 128.0, 126.3, 82.9, 62.5, 52.8, 38.6, 34.3, 32.1, 28.8, 28.2, 25.3, 25.2, 22.5, 22.4, 21.8, 14.0; HRMS (ESI): calc. for  $C_{27}H_{41}BNaO_6$   $[M+Na]^+$ : 495.2893; found: 495.2899.

(*Z*)-Dimethyl 4-cyclohexylidene-3-(1-(4,4,5,5-tetramethyl-1,3,2-dioxaborolan-2-yl)-hex-1-enyl)cyclopent-2-ene-1,1-dicarboxylate (**4f'**) (less polar)

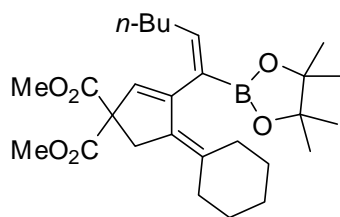

20% isolated yield, liquid.  $^1\text{H}$  NMR (500 MHz,  $\text{CDCl}_3$ ):  $\delta$  5.75 (s, 1H), 5.28-5.22 (m, 1H), 3.73 (s, 6H), 3.10 (s, 2H), 2.21-2.16 (m, 2H), 2.15-2.08 (m, 2H), 2.06-1.97 (m, 2H), 1.68-1.61 (m, 2H), 1.60-1.56 (m, 2H), 1.38-1.32 (m, 2H), 1.31-1.22 (m, 4H), 1.13 (s, 12H), 0.88 (t,  $J = 7.0$  Hz, 3H);  $^{13}\text{C}$  NMR (125 MHz,  $\text{CDCl}_3$ ):  $\delta$  171.4, 152.5, 143.7, 142.9, 125.9, 121.3, 82.8, 63.8, 52.7, 35.1, 31.8, 31.7, 29.5, 29.0, 27.4, 24.6, 22.6, 22.5, 22.1, 14.0; HRMS (ESI): calc. for  $\text{C}_{27}\text{H}_{41}\text{BNaO}_6$   $[\text{M}+\text{Na}]^+$ : 495.2893; found: 495.2902.

*(E)*-2-(1-(4,4-Bis(benzyloxymethyl)-2-(prop-1-en-2-yl)cyclopent-2-enylidene)hexyl)-4,4,5,5-tetramethyl-1,3,2-dioxaborolane (**4g**)

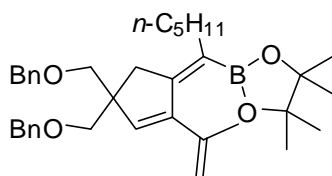

57% isolated yield, liquid.  $^1\text{H}$  NMR (500 MHz,  $\text{CDCl}_3$ ):  $\delta$  7.35-7.24 (m, 10H), 5.88 (s, 1H), 4.99 (s, 1H), 4.97 (s, 1H), 4.53 (s, 4H), 3.47 (s, 4H), 2.49 (s, 2H), 2.14 (t,  $J = 8.0$  Hz, 2H), 1.95 (s, 3H), 1.42-1.35 (m, 2H), 1.34-1.28 (m, 4H), 1.28 (s, 12H), 0.90 (t,  $J = 7.0$  Hz, 3H);  $^{13}\text{C}$  NMR (125 MHz,  $\text{CDCl}_3$ ):  $\delta$  150.9, 149.4, 141.1, 138.9, 136.1, 128.2, 127.4, 127.3, 115.4, 83.1, 73.4, 73.2, 51.4, 37.6, 33.9, 32.1, 29.0, 25.2, 24.0, 22.6, 14.1; HRMS (ESI): calc. for  $\text{C}_{36}\text{H}_{49}\text{BNaO}_4$   $[\text{M}+\text{Na}]^+$ : 579.3622; found: 579.3630.



**General procedure for oxidative carbocyclization/borylation for the formation of vinylallenes 5**

Representative procedure B for the synthesis of **5**. Dimethyl 4-(prop-1-enylidene)-3-(2-(4,4,5,5-tetramethyl-1,3,2-dioxaborolan-2-yl)propan-2-yl)cyclopent-2-ene-1,1-dicarboxylate (**5a**)

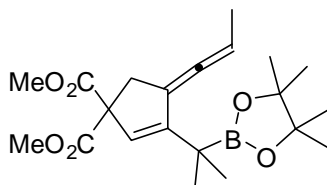

To a mixture of B<sub>2</sub>pin<sub>2</sub> (66.2 mg, 0.26 mmol), BQ (24.0 mg, 0.22 mmol), Pd(OAc)<sub>2</sub> (1.0 mg, 0.004 mmol), and BF<sub>3</sub>·Et<sub>2</sub>O (6 μL, 0.04 mmol) were added **1a** (52.7 mg, 0.20 mmol) and 1.0 mL of THF at rt. The reaction was stirred at 50 °C for 20 h. After the reaction was complete as monitored by TLC, evaporation and column chromatography on silica gel (pentane/ethyl acetate = 10/1) afforded **5a** (59.6 mg, 77%) as a liquid; <sup>1</sup>H NMR (400 MHz, CDCl<sub>3</sub>): δ 5.55 (d, *J* = 1.6 Hz, 1H), 5.34-5.23 (m, 1H), 3.716 (s, 3H), 3.715 (s, 3H), 3.19-3.17 (m, 2H), 1.68 (d, *J* = 7.2 Hz, 3H), 1.18 (s, 12H), 1.17 (s, 3H), 1.13 (s, 3H); <sup>13</sup>C NMR (100 MHz, CDCl<sub>3</sub>): δ 199.1, 171.5, 171.3, 153.8, 122.9, 107.1, 91.2, 83.1, 63.5, 52.7, 36.5, 25.0, 24.7, 24.5, 23.9, 23.8, 14.8; HRMS (ESI): calc. for C<sub>21</sub>H<sub>31</sub>BNaO<sub>6</sub> [M+Na]<sup>+</sup>: 413.2106; found: 413.2103.

Dimethyl 3-(2'-(4,4,5,5-tetramethyl-1,3,2-dioxaborolan-2-yl)propan-2'-yl)-4-vinylidenecyclopent-2-ene-1,1-dicarboxylate (**5b**)

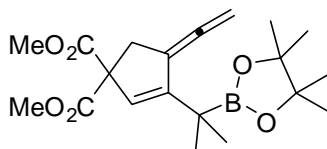

73% isolated yield, liquid. <sup>1</sup>H NMR (500 MHz, CDCl<sub>3</sub>): δ 5.57 (t, *J* = 1.5 Hz, 1H), 5.02 (t, *J* = 4.0 Hz, 1H), 5.01 (t, *J* = 4.0 Hz, 1H), 3.74 (s, 6H), 3.25 (t, *J* = 4.0 Hz, 2H), 1.20 (s, 12H), 1.19 (s, 6H); <sup>13</sup>C NMR (125 MHz, CDCl<sub>3</sub>): δ 203.1, 171.2, 153.2, 123.0, 107.4, 83.2, 81.0, 63.7, 52.8, 36.4, 24.6, 23.9; HRMS (ESI): calc. for C<sub>20</sub>H<sub>29</sub>BNaO<sub>6</sub> [M+Na]<sup>+</sup>: 399.1949; found: 399.1952.

*Dimethyl 3-(2-(4,4,5,5-tetramethyl-1,3,2-dioxaborolan-2-yl)butan-2-yl)-4-vinylidene-cyclopent-2-ene-1,1-dicarboxylate (5c)*

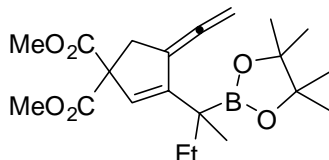

56% isolated yield, liquid.  $^1\text{H}$  NMR (400 MHz,  $\text{CDCl}_3$ ):  $\delta$  5.58 (s, 1H), 5.04-4.94 (m, 2H), 3.73 (s, 3H), 3.71 (s, 3H), 3.25 (dt,  $J_1 = 16.0$  Hz,  $J_2 = 4.0$  Hz, 1H), 3.18 (dt,  $J_1 = 16.0$  Hz,  $J_2 = 4.0$  Hz, 1H), 1.83-1.73 (m, 1H), 1.64-1.54 (m, 1H), 1.192 (s, 6H), 1.188 (s, 6H), 1.14 (s, 3H), 0.74 (t,  $J = 7.2$  Hz, 3H);  $^{13}\text{C}$  NMR (100 MHz,  $\text{CDCl}_3$ ):  $\delta$  203.0, 171.3, 171.1, 151.1, 124.8, 107.2, 83.1, 80.8, 63.7, 52.7, 36.5, 28.1, 24.7, 24.6, 19.6, 8.6; HRMS (ESI): calc. for  $\text{C}_{21}\text{H}_{31}\text{BNaO}_6$   $[\text{M}+\text{Na}]^+$ : 413.2106; found: 413.2112.

*Dimethyl 4-(hex-1-enylidene)-3-(2-(4,4,5,5-tetramethyl-1,3,2-dioxaborolan-2-yl)propan-2-yl)cyclopent-2-ene-1,1-dicarboxylate (5d)*

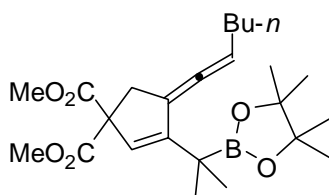

79% isolated yield, liquid.  $^1\text{H}$  NMR (400 MHz,  $\text{CDCl}_3$ ):  $\delta$  5.55 (d,  $J = 1.6$  Hz, 1H), 5.32-5.25 (m, 1H), 3.71 (s, 6H), 3.21 (dd,  $J_1 = 16.0$  Hz,  $J_2 = 3.6$  Hz, 1H), 3.14 (dd,  $J_1 = 16.0$  Hz,  $J_2 = 3.6$  Hz, 1H), 2.09-2.01 (m, 2H), 1.42-1.28 (m, 4H), 1.18 (s, 9H), 1.17 (s, 6H), 1.13 (s, 3H), 0.88 (t,  $J = 7.2$  Hz, 3H);  $^{13}\text{C}$  NMR (100 MHz,  $\text{CDCl}_3$ ):  $\delta$  198.0, 171.5, 171.3, 153.9, 122.9, 107.5, 96.6, 83.1, 63.5, 52.7, 36.8, 31.1, 29.2, 24.7, 24.5, 24.0, 23.8, 22.2, 13.8; HRMS (ESI): calc. for  $\text{C}_{24}\text{H}_{37}\text{BNaO}_6$   $[\text{M}+\text{Na}]^+$ : 455.2580; found: 455.2582.

*[D<sub>6</sub>]-Dimethyl 4-(hex-1-enylidene)-3-(2-(4,4,5,5-tetramethyl-1,3,2-dioxaborolan-2-yl)propan-2-yl)cyclopent-2-ene-1,1-dicarboxylate ([D<sub>6</sub>]-5d)*

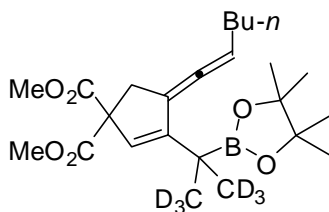

54% isolated yield (Scheme 3c), liquid.  $^1\text{H}$  NMR (500 MHz,  $\text{CDCl}_3$ ):  $\delta$  5.56 (s, 1H), 5.32-5.26 (m, 1H), 3.73 (s, 6H), 3.23 (dd,  $J_1 = 16.0$  Hz,  $J_2 = 3.5$  Hz, 1H), 3.15 (dd,  $J_1 = 16.0$  Hz,  $J_2 = 3.5$  Hz, 1H), 2.09-2.01 (m, 2H), 1.42-1.28 (m, 4H), 1.19 (s, 6H), 1.18 (s, 6H), 0.89 (t,  $J = 7.5$  Hz, 3H);  $^{13}\text{C}$  NMR (125 MHz,  $\text{CDCl}_3$ ):  $\delta$  198.0, 171.6, 171.3, 153.9, 122.8, 107.5, 96.6, 83.1, 63.5, 52.7, 36.9, 31.1, 29.3, 24.8, 24.5, 22.2, 13.9; HRMS (ESI): calc. for  $\text{C}_{24}\text{H}_{31}\text{BD}_6\text{NaO}_6$   $[\text{M}+\text{Na}]^+$ : 461.2956; found: 461.2951.

*Dimethyl 4-(hex-1-enylidene)-3-(2-(4,4,5,5-tetramethyl-1,3,2-dioxaborolan-2-yl)-butan-2-yl)cyclopent-2-ene-1,1-dicarboxylate (5e)*

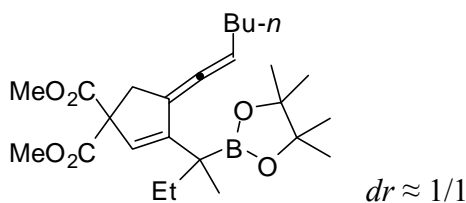

77% isolated yield, liquid.  $^1\text{H}$  NMR (400 MHz,  $\text{CDCl}_3$ ):  $\delta$  5.61-5.55 (m, 1H), 5.32-5.22 (m, 1H), 3.72-3.68 (m, 6H), 3.25-3.06 (m, 2H), 2.09-1.96 (m, 2H), 1.88-1.76 (m, 0.5H), 1.72-1.62 (m, 1H), 1.51-1.41 (m, 0.5H), 1.40-1.41 (m, 4H), 1.22-1.10 (m, 15H), 0.91-0.82 (m, 3H), 0.81 (t,  $J = 7.2$  Hz, 1.5H), 0.66 (t,  $J = 7.2$  Hz, 1.5H);  $^{13}\text{C}$  NMR (100 MHz,  $\text{CDCl}_3$ ):  $\delta$  198.0, 197.9, 171.5, 171.4, 171.3, 171.2, 152.2, 151.4, 125.0, 124.4, 107.5, 107.2, 96.4, 96.1, 83.1, 83.0, 63.5, 63.4, 52.6, 37.0, 36.9, 31.1, 30.8, 29.2, 29.1, 29.0, 27.4, 25.0, 24.9, 24.7, 24.6, 24.4, 22.2, 20.2, 19.4, 13.8, 9.5, 8.0; HRMS (ESI): calc. for  $\text{C}_{25}\text{H}_{39}\text{BNaO}_6$   $[\text{M}+\text{Na}]^+$ : 469.2732; found: 469.2728.

*Dimethyl 4-(hex-1-enylidene)-3-(1-(4,4,5,5-tetramethyl-1,3,2-dioxaborolan-2-yl)-cyclohexyl)cyclopent-2-ene-1,1-dicarboxylate (5f)*

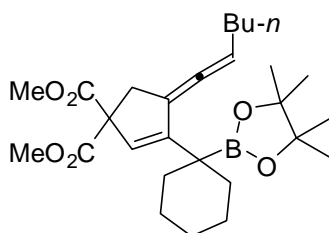

70% isolated yield, liquid.  $^1\text{H}$  NMR (400 MHz,  $\text{CDCl}_3$ ):  $\delta$  5.59 (d,  $J = 1.2$  Hz, 1H), 5.30-5.22 (m, 1H), 3.714 (s, 3H), 3.705 (s, 3H), 3.16 (dd,  $J_1 = 16.0$  Hz,  $J_2 = 3.6$  Hz, 1H), 3.09 (dd,  $J_1 = 16.0$  Hz,  $J_2 = 3.6$  Hz, 1H), 2.19-2.01 (m, 4H), 1.70-1.61 (m, 1H), 1.60-1.45 (m, 3H), 1.44-1.25 (m, 8H), 1.19 (s, 6H), 1.18 (s, 6H), 0.89 (t,  $J = 7.2$  Hz, 3H);  $^{13}\text{C}$  NMR (100 MHz,  $\text{CDCl}_3$ ):  $\delta$  198.5, 171.5, 171.2, 151.8, 124.2, 106.6, 95.8, 83.1, 63.3, 52.6, 37.2, 32.8, 32.6, 31.0, 29.1, 26.4, 25.0, 24.71, 24.66, 24.5, 24.4, 22.1, 13.9; HRMS (ESI): calc. for  $\text{C}_{27}\text{H}_{41}\text{BNaO}_6$   $[\text{M}+\text{Na}]^+$ : 495.2888; found: 495.2877.

*2-(2-(3,3-Bis(benzyloxymethyl)-5-(hex-1-enylidene)cyclopent-1-enyl)propan-2-yl)-4,4,5,5-tetramethyl-1,3,2-dioxaborolane (5g)*

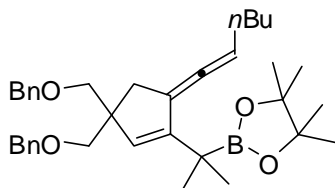

37% isolated yield, liquid.  $^1\text{H}$  NMR (500 MHz,  $\text{CDCl}_3$ ):  $\delta$  7.35-7.24 (m, 10H), 5.51 (d,  $J = 1.5$  Hz, 1H), 5.25-5.20 (m, 1H), 4.55 (s, 4H), 3.53-3.42 (m, 4H), 2.54-2.42 (m, 2H), 2.09-2.01 (m, 2H), 1.44-1.30 (m, 4H), 1.21 (s, 6H), 1.20 (s, 6H), 1.18 (s, 3H), 1.14 (s, 3H), 0.91 (t,  $J = 7.0$  Hz, 3H);  $^{13}\text{C}$  NMR (125 MHz,  $\text{CDCl}_3$ ):  $\delta$  198.3, 151.0, 139.1, 139.0, 129.2, 128.2, 127.34, 127.29, 127.21, 127.19, 108.9, 95.2, 82.9, 73.8, 73.7, 73.2, 52.0, 37.0, 31.3, 29.5, 24.8, 24.5, 24.1, 24.0, 22.2, 13.9; HRMS (ESI): calc. for  $\text{C}_{36}\text{H}_{49}\text{BNaO}_4$   $[\text{M}+\text{Na}]^+$ : 579.3622; found: 579.3623.

### Explanation for the formation of 4f' from 4f.

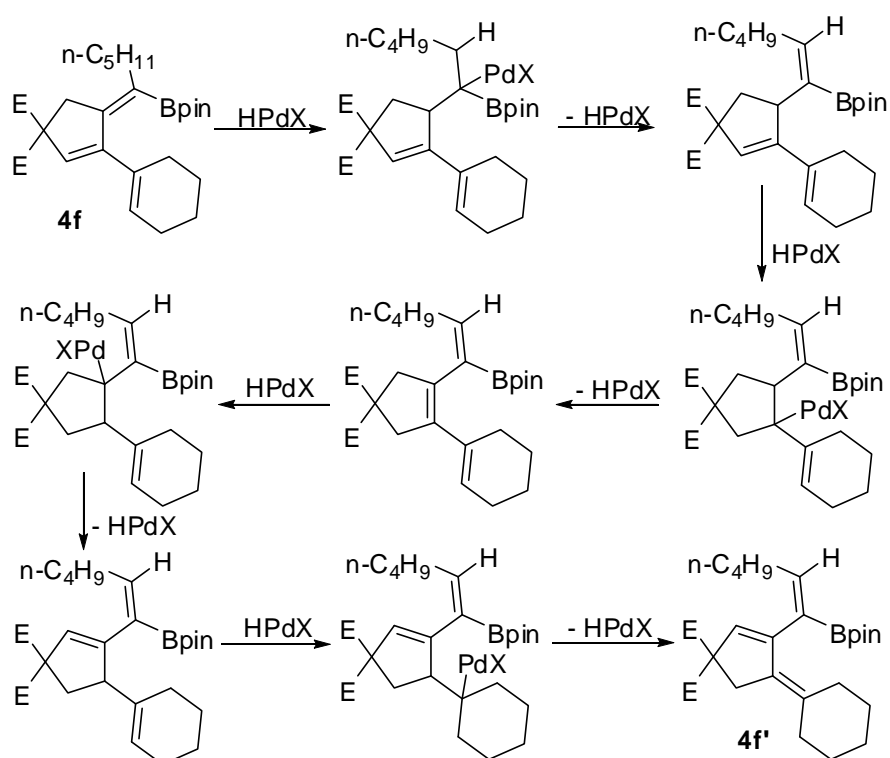

**Scheme S1**

**Application:**<sup>3a</sup>

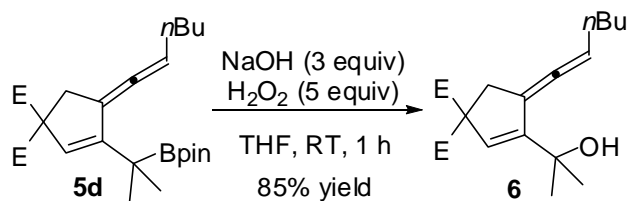

*Dimethyl 4-(hex-1-enylidene)-3-(2-hydroxypropan-2-yl)cyclopent-2-ene-1,1-dicarboxylate (6)*<sup>3c</sup>

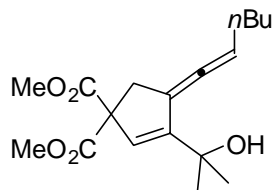

To a solution of **5d** (367.7 mg, 0.85 mmol) in THF (17 mL) were added H<sub>2</sub>O<sub>2</sub> (0.48 mL, 30% in H<sub>2</sub>O, 4.25 mmol), NaOH aqueous solution (0.85 mL, 3M, 2.55 mmol) sequentially at rt for 1 h. When the reaction was complete as monitored by TLC, the mixture was diluted with Et<sub>2</sub>O (20 mL) and H<sub>2</sub>O (10 mL). The organic layer was separated and the aqueous layer was extracted with diethyl ether (2 x 20 mL). The combined organic layers were dried over Na<sub>2</sub>SO<sub>4</sub>. Concentration and column chromatography on silica gel (pentane/ethyl acetate = 3:1) afforded **6** (232.1 mg, 85%): liquid; <sup>1</sup>H NMR (500 MHz, CDCl<sub>3</sub>): 5.84 (s, 1H), 5.50-5.41 (m, 1H), 3.75 (s, 3H), 3.74 (s, 3H), 3.30-3.20 (m, 2H), 2.14 (s, 1H), 2.13-2.02 (m, 2H), 1.43 (s, 6H), 1.42-1.30 (m, 4H), 0.90 (t, *J* = 7.0 Hz, 3H).

## Kinetic Isotope Effect (KIE) Experiments

### 1. Determination of Intermolecular Competition KIE of the triene formation.

To a mixture of B<sub>2</sub>pin<sub>2</sub> (66.0 mg, 0.26 mmol), BQ (24.0 mg, 0.22 mmol), Pd(OAc)<sub>2</sub> (0.9 mg, 0.004 mmol), and LiOAc·2H<sub>2</sub>O (4.1 mg, 0.04 mmol) were added **1a** (30.6 mg, 0.10 mmol), 0.5 mL of DCE, [D<sub>2</sub>]-**1a** (30.8 mg, 0.10 mmol), and 0.5 mL of DCE sequentially in a vial at rt. Then the reaction was stirred at 50 °C for 1 h, quenched with Et<sub>2</sub>O (5 mL), and concentrated under reduced pressure. The yields of **4d** and [D<sub>5</sub>]-**4d** were analyzed by <sup>1</sup>H NMR measurement using anisole as the internal standard (11 μL, 0.1 mmol) and the ratio of **4d**/[D<sub>5</sub>]-**4d** was analyzed by HRMS and determined by comparing the abundance of the corresponding [M+Na] and [M+5+Na] peaks (assuming **4d** and [D<sub>5</sub>]-**4d** have similar ionization pattern).

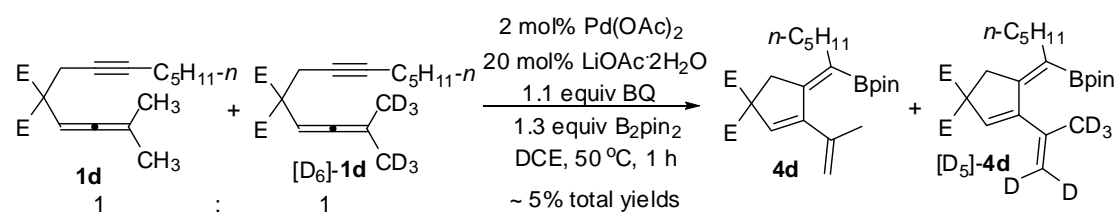

**Table S1.**

|                                                                                  | 1st    | 2nd    | average |
|----------------------------------------------------------------------------------|--------|--------|---------|
| Abundance of <b>4d</b>                                                           | 173744 | 102314 |         |
| Abundance of [D <sub>5</sub> ]- <b>4d</b>                                        | 27420  | 14671  |         |
| Abundance of <b>1d</b> in the end of the reaction                                | 625356 | 441152 |         |
| Abundance of [D <sub>6</sub> ]- <b>1d</b> in the end of the reaction             | 624172 | 456367 |         |
| The ratio ( <b>1d</b> /[D <sub>6</sub> ]- <b>1d</b> ) in the end of the reaction | 1.00   | 0.97   |         |
| KIE                                                                              | 6.34   | 6.97   | 6.66    |

# Display Report

**Analysis Info**

Analysis Name E:\Data2\Youqian\dyq-4-178000001.d  
 Method Tune\_low\_pos.m  
 Sample Name dyq-4-178  
 Comment

Acquisition Date 2012-12-03 20:54:04

Operator Carin Larsson  
 Instrument / Ser# microTOF 125

**Acquisition Parameter**

|             |            |                      |          |                  |           |
|-------------|------------|----------------------|----------|------------------|-----------|
| Source Type | ESI        | Ion Polarity         | Positive | Set Nebulizer    | 0.4 Bar   |
| Focus       | Not active |                      |          | Set Dry Heater   | 180 °C    |
| Scan Begin  | 50 m/z     | Set Capillary        | 4000 V   | Set Dry Gas      | 4.0 l/min |
| Scan End    | 2000 m/z   | Set End Plate Offset | -500 V   | Set Divert Valve | Source    |

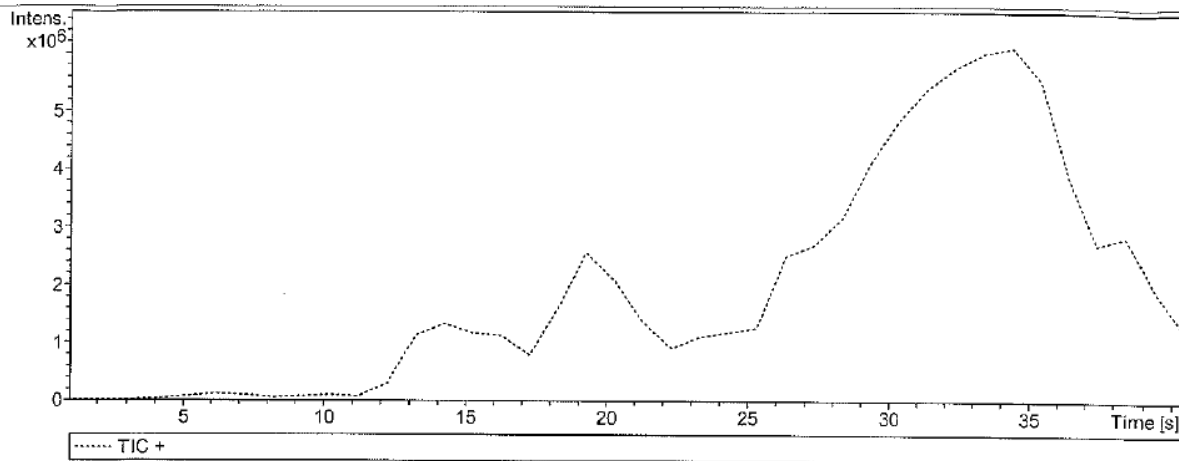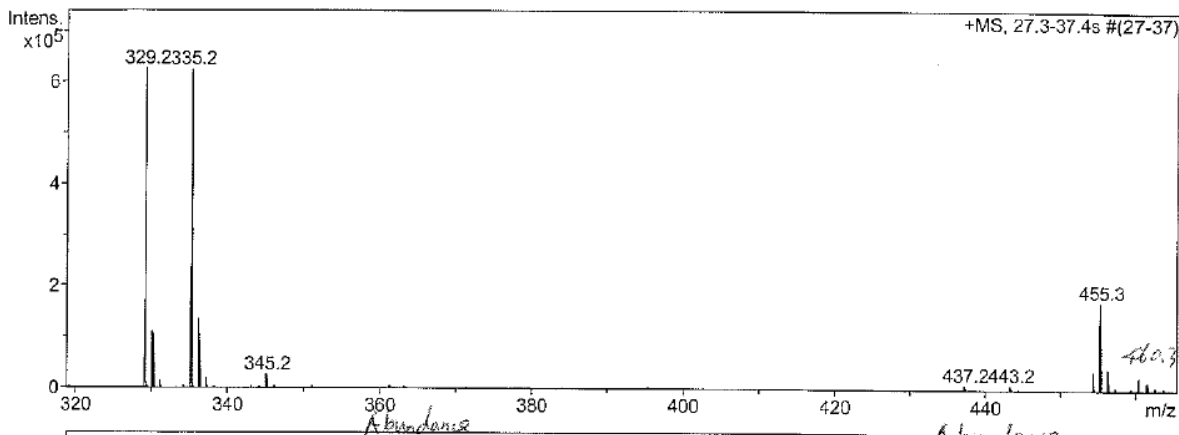

|                                                                                                              |                                                                                                                         |
|--------------------------------------------------------------------------------------------------------------|-------------------------------------------------------------------------------------------------------------------------|
| <p>For mw 329 = <math>\frac{625356}{(1d)} = 1</math></p> <p>mw 335 = <math>\frac{624172}{(Dd)-1d}</math></p> | <p>For mw = 455.3 = <math>\frac{173748}{(4d)} = 6.3</math></p> <p>MW = 860 = <math>\frac{17420}{(Dd)-4d} = 1</math></p> |
|--------------------------------------------------------------------------------------------------------------|-------------------------------------------------------------------------------------------------------------------------|



## 2. Determination of Intermolecular Competition KIE of the vinylallene formation.

To a mixture of B<sub>2</sub>pin<sub>2</sub> (66.0 mg, 0.26 mmol), BQ (24.0 mg, 0.22 mmol), Pd(OAc)<sub>2</sub> (0.9 mg, 0.004 mmol), and BF<sub>3</sub>·Et<sub>2</sub>O (6 μL, 0.04 mmol) were added **1a** (30.6 mg, 0.10 mmol), 0.5 mL of THF, [D<sub>2</sub>]-**1a** (30.8 mg, 0.10 mmol), and 0.5 mL of THF sequentially in a vial at rt. Then the reaction was stirred at 50 °C for 1 h, quenched with Et<sub>2</sub>O (5 mL), and concentrated under reduced pressure. The yields and the ratio of **5d** and [D<sub>1</sub>]-**5d** were analyzed by <sup>1</sup>H NMR measurement using anisole as the internal standard (11 μL, 0.1 mmol).

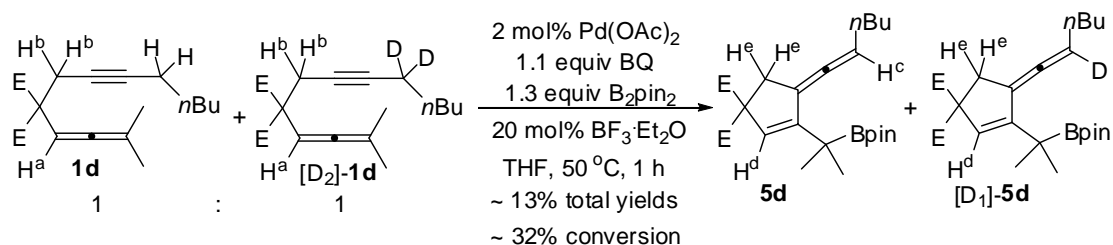

**Table S2.**

|                                                                                             | 1st  | 2nd  | 3rd  | 4th  | average |
|---------------------------------------------------------------------------------------------|------|------|------|------|---------|
| Yield of <b>5d</b> (%)                                                                      | 7.4  | 9.6  | 9.9  | 9.8  |         |
| Total yields of <b>5d</b> + <b>[D<sub>1</sub>]-5d</b> (%)                                   | 10.5 | 15.0 | 12.9 | 13.6 | 13.0    |
| Yield of <b>[D<sub>1</sub>]-5d</b> (%) (from calculation)                                   | 3.1  | 5.4  | 3.0  | 3.8  |         |
| Conversion (%)                                                                              | 26   | 37   | 33   | 30   | 31.5    |
| Ratio between <b>5d</b> / <b>[D<sub>1</sub>]-5d</b>                                         | 2.39 | 1.78 | 3.30 | 2.58 | 2.43    |
| The estimated ratio ( <b>[D<sub>2</sub>]-1d</b> / <b>1d</b> )<br>in the end of the reaction | 1.12 | 1.14 | 1.23 | 1.09 | 1.15    |
| KIE                                                                                         | 2.53 | 1.90 | 3.66 | 2.81 | 2.73    |

Since the ratio of the starting material continuously changes during the reaction, the isotope effect is obtained after a slight correction of this factor. Taking the experiment 1 for example, the ratio (**1d**/**[D<sub>2</sub>]-1d**) in the end of the reaction was estimated to be 1:1.12. The yield of (**5d** + **[D<sub>1</sub>]-5d**) was 10.5% at a 26% conversion. Here, we assume the 15.5% (26%-10.5%) of the starting materials were converted to by-products without any isotope effect. Then the remaining **1d** should be 50%-(15.5%/2)-7.4% = 34.8% and the remaining **[D<sub>2</sub>]-1a** should be 50%-(15.5%/2)-3.1% = 39.1%, respectively. Therefore, the isotope effect calculated from the product ratio and the

change of the starting material ratio is approximately 2.53 (namely,  $2.39 \times [(1+1.12)/2]$ ).

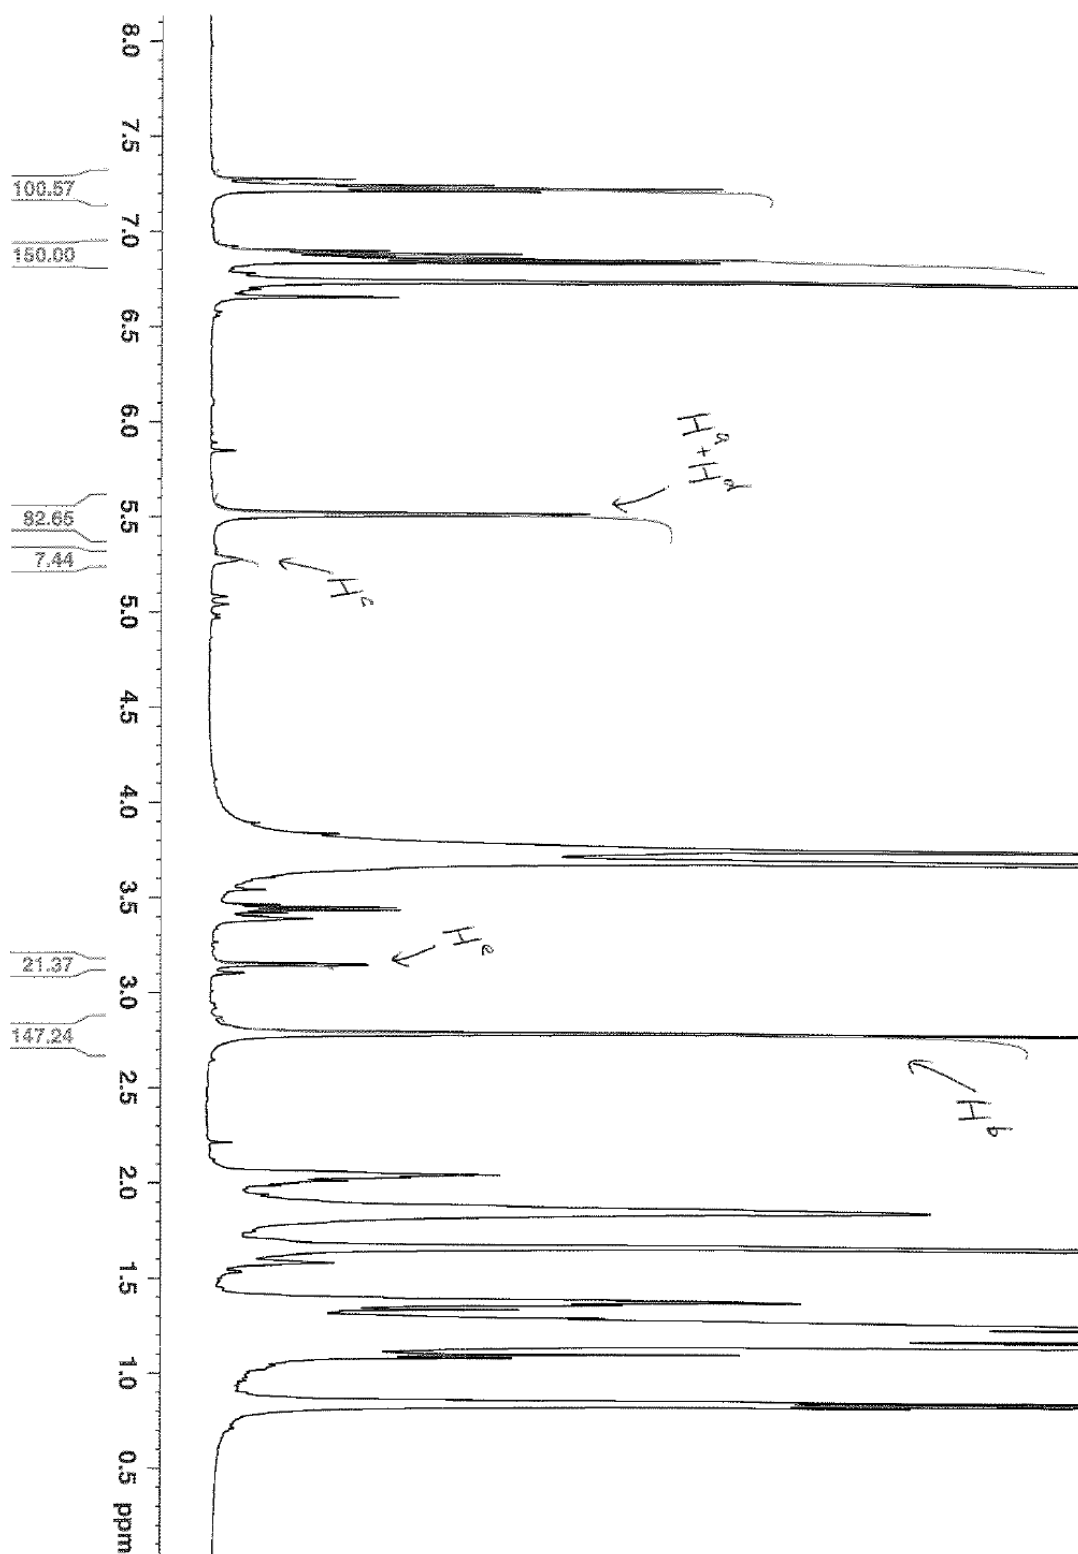

### 3. Determination of Intramolecular KIE of the vinylallene formation.

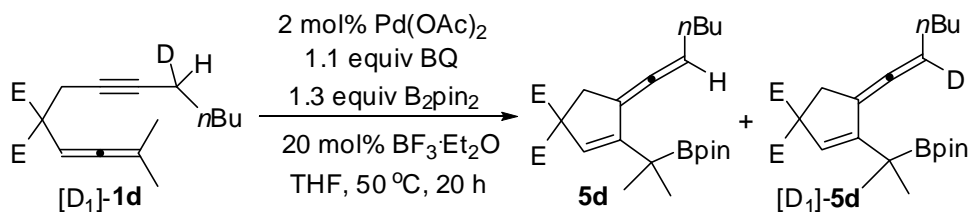

To a mixture of  $B_2pin_2$  (66.0 mg, 0.26 mmol), BQ (24.0 mg, 0.22 mmol),  $Pd(OAc)_2$  (0.9 mg, 0.004 mmol), and  $BF_3 \cdot Et_2O$  (6  $\mu L$ , 0.04 mmol) were added  $[D_1]-1d$  (61.4 mg, 0.20 mmol) and 1.0 mL of THF sequentially in a vial at rt. Then the reaction was stirred at 50 °C for 20 h, quenched with  $Et_2O$  (5 mL), and concentrated under reduced pressure. The yields and the ratio of  $5d$  and  $[D_1]-5d$  were analyzed by  $^1H$  NMR measurement using anisole as the internal standard (22  $\mu L$ , 0.2 mmol).

**Table S3.**

|                         | 1st  | 2nd  | 3rd  | average |
|-------------------------|------|------|------|---------|
| Yield of $5d$ (%)       | 12   | 11   | 9    |         |
| Yield of $[D_1]-5d$ (%) | 54   | 55   | 57   |         |
| Total yields (%)        | 66   | 66   | 66   | 66      |
| KIE                     | 4.50 | 5.00 | 6.33 | 5.28    |

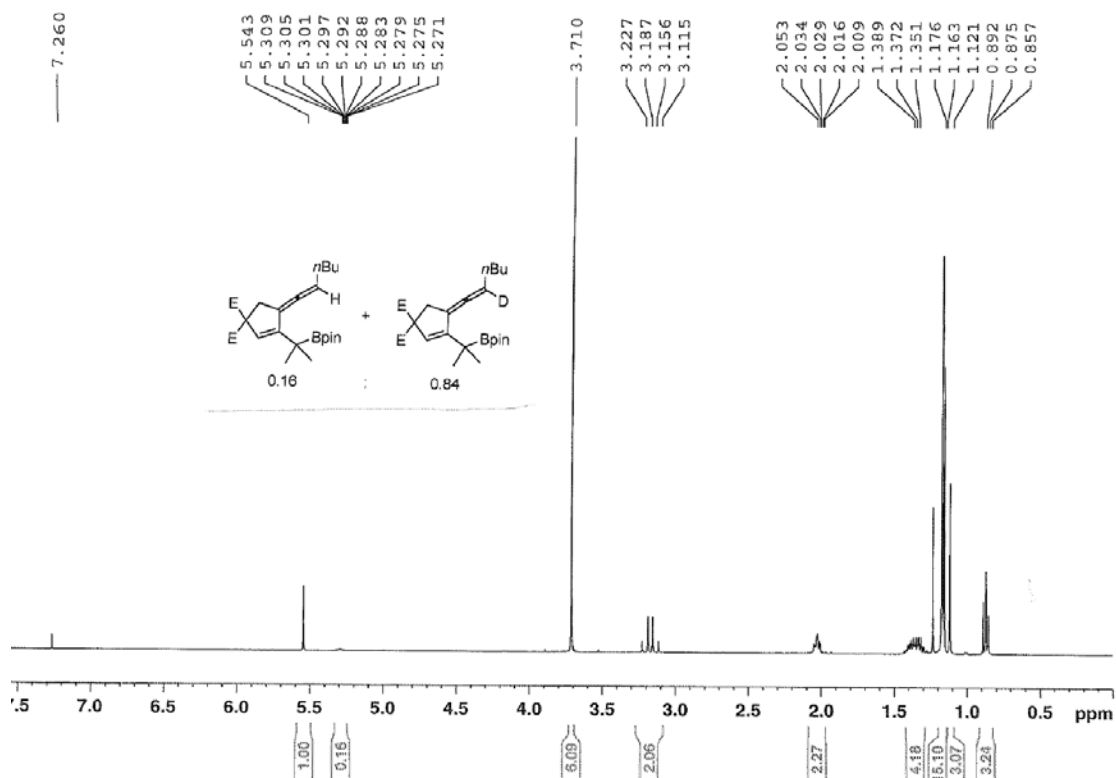

#### 4. Effect of isotope substitution at the alkyne part on product distribution.

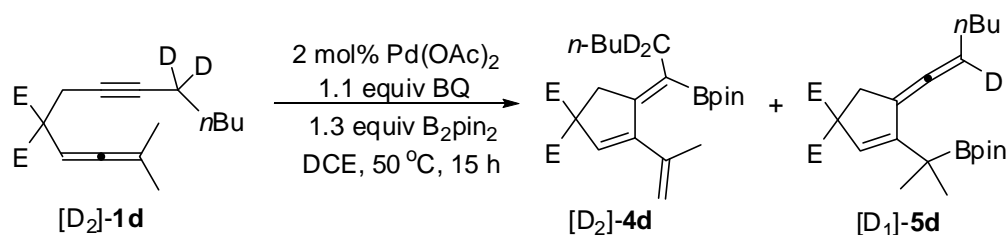

To a mixture of  $\text{B}_2\text{pin}_2$  (33.0 mg, 0.13 mmol), BQ (12.0 mg, 0.11 mmol), and  $\text{Pd(OAc)}_2$  (0.5 mg, 0.002 mmol) were added  $[\text{D}_2]\text{-1d}$  (30.8 mg, 0.10 mmol) and 0.5 mL of DCE sequentially in a vial at rt. Then the reaction was stirred at 50 °C for 15 h, quenched with  $\text{Et}_2\text{O}$  (2.5 mL), and concentrated under reduced pressure. The yields and the ratio of  $[\text{D}_2]\text{-4d}$  and  $[\text{D}_1]\text{-5d}$  were analyzed by  $^1\text{H}$  NMR measurement using anisole as the internal standard (11  $\mu\text{L}$ , 0.1 mmol).

**Table S4.**

|                                                       | 1st | 2nd | average |
|-------------------------------------------------------|-----|-----|---------|
| Yield of $[\text{D}_2]\text{-4d}$ (%)                 | 73  | 75  | 74      |
| Yield of $[\text{D}_1]\text{-5d}$ (%)                 | 6   | 6   | 6       |
| Ratio $[\text{D}_2]\text{-4d}/[\text{D}_1]\text{-5d}$ |     |     | 12.3/1  |

#### 5. Effect of isotope substitution at allene part on product distribution.

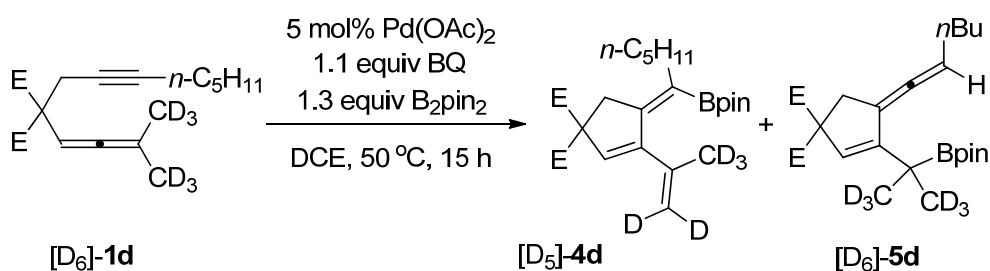

To a mixture of  $\text{B}_2\text{pin}_2$  (33.0 mg, 0.13 mmol), BQ (12.0 mg, 0.11 mmol), and  $\text{Pd(OAc)}_2$  (1.2 mg, 0.005 mmol) were added  $[\text{D}_6]\text{-1d}$  (31.2 mg, 0.10 mmol) and 0.5 mL of DCE sequentially in a vial at rt. Then the reaction was stirred at 50 °C for 15 h, quenched with  $\text{Et}_2\text{O}$  (2.5 mL), and concentrated under reduced pressure. The yields and the ratio of  $[\text{D}_5]\text{-4d}$  and  $[\text{D}_6]\text{-5d}$  were analyzed by  $^1\text{H}$  NMR measurement using anisole as the internal standard (11  $\mu\text{L}$ , 0.1 mmol).

The product ratio for this experiment was obtained from the integration of the overlapping CH<sub>2</sub> signals at ca. 3.20 ppm. To enhance accuracy of the integration, the ratio was determined as the average of two methods of integrating the signal, which led to [D<sub>5</sub>]-**4d**/[D<sub>6</sub>]-**5d** is 1/5.0, and the <sup>1</sup>H NMR yield is 12% and 60%, respectively.

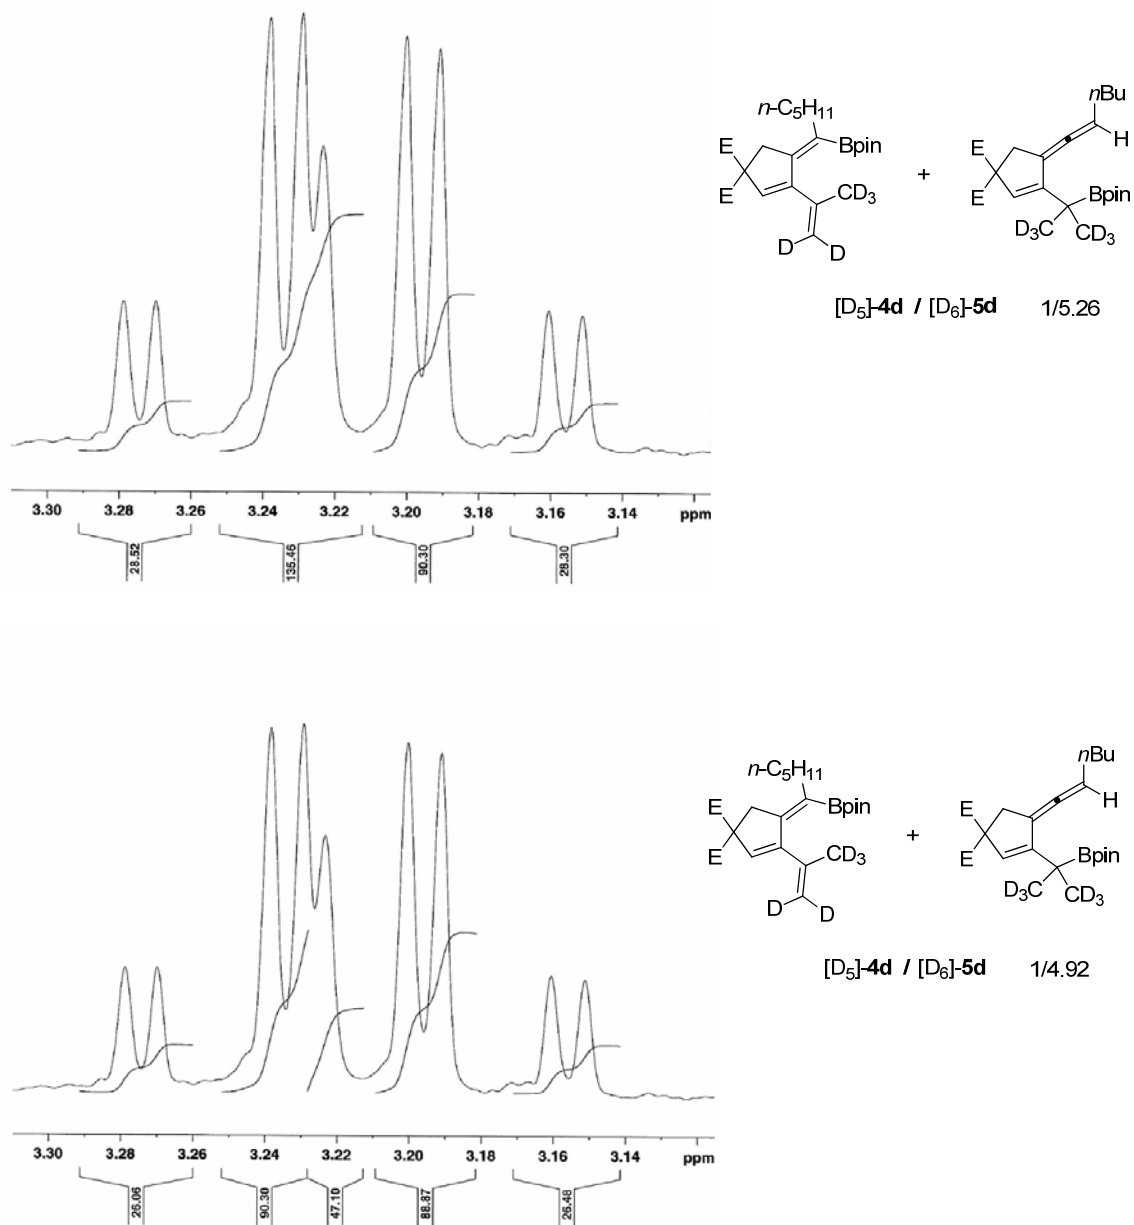

Figure S1.

### Alternative mechanism to that proposed in Scheme 5 for oxidative carbocyclization/borylation of allene **1**

A mechanism involving a pallada(IV)cyclopentene intermediate **F** is also possible, which would generate intermediates **C** and **E** selectively via  $\beta$ -H elimination and subsequent loss of HOAc leading to products **4** and **5**, respectively.

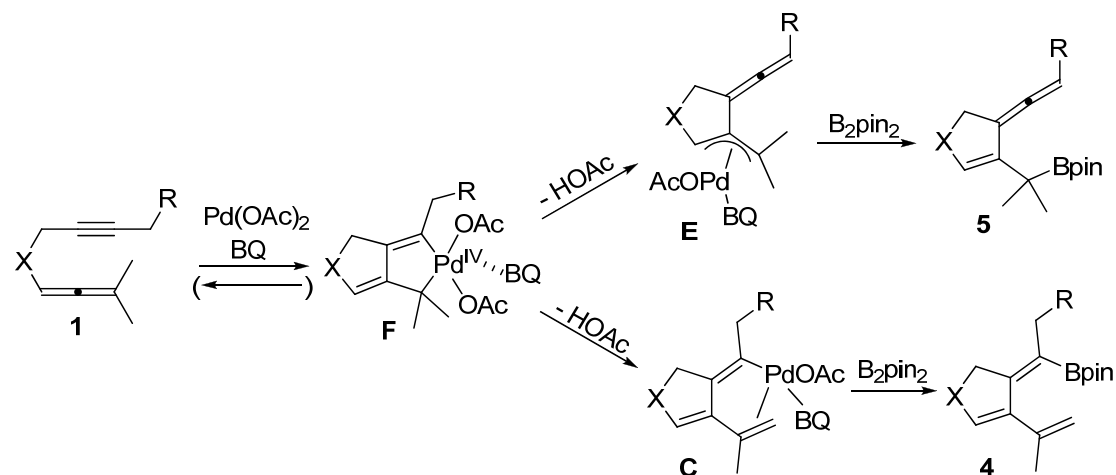

**Scheme S2.** Proposed alternative mechanism for palladium-catalyzed oxidative selective carbocyclization/borylation of allenes **1**.

### References:

1. a) D. K. Black, S. R. Landor, A. N. Patel, P. F. Whiter, *Tetrahedron Lett.* **1963**, *4*, 483; b) A. K. Å. Persson, E. V. Johnston, J.-E. Bäckvall, *Org. Lett.* **2009**, *11*, 3814.
2. C. Sperger, L. H. S. Strand, A. Fiksdahl, *Tetrahedron* **2010**, *66*, 7749.
3. a) V. Pardo-Rodríguez, J. Marco-Martínez, E. Buñuel, D. J. Cárdenas, *Org. Lett.* **2009**, *11*, 4548; b) Y. Deng, T. Bartholomeyzik, A. K. Å. Persson, J. Sun, J.-E. Bäckvall, *Angew. Chem.* **2012**, *124*, 2757; *Angew. Chem. Int. Ed.* **2012**, *51*, 2703; c) Y. Deng, J.-E. Bäckvall, *Angew. Chem. Int. Ed.* **2013**, DOI: 10.1002/anie.201208718.

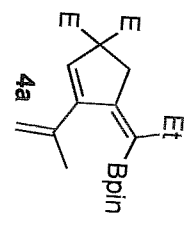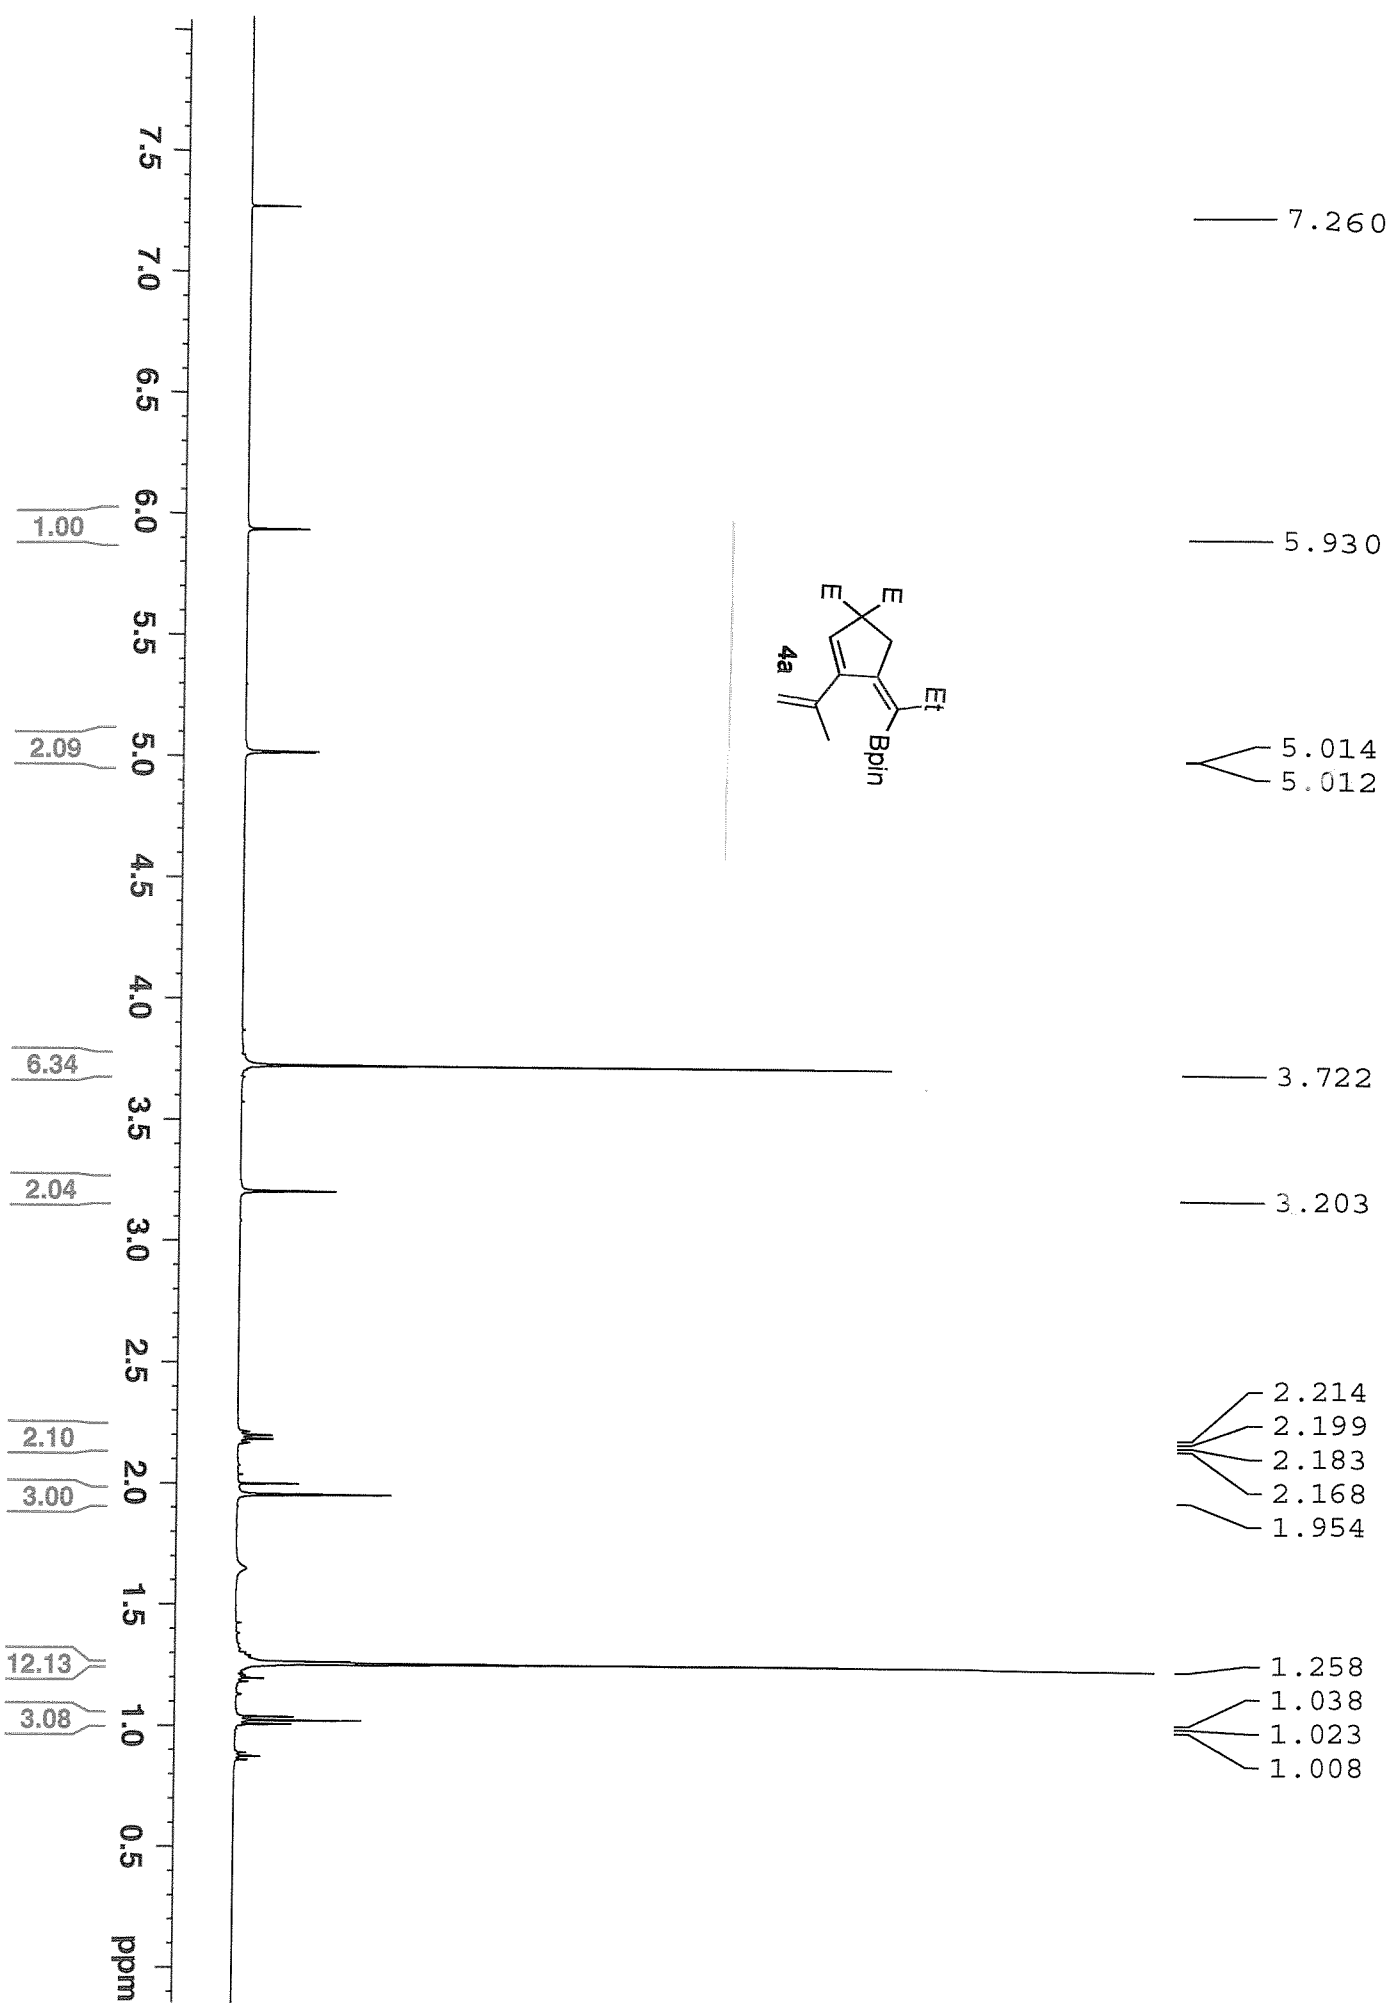

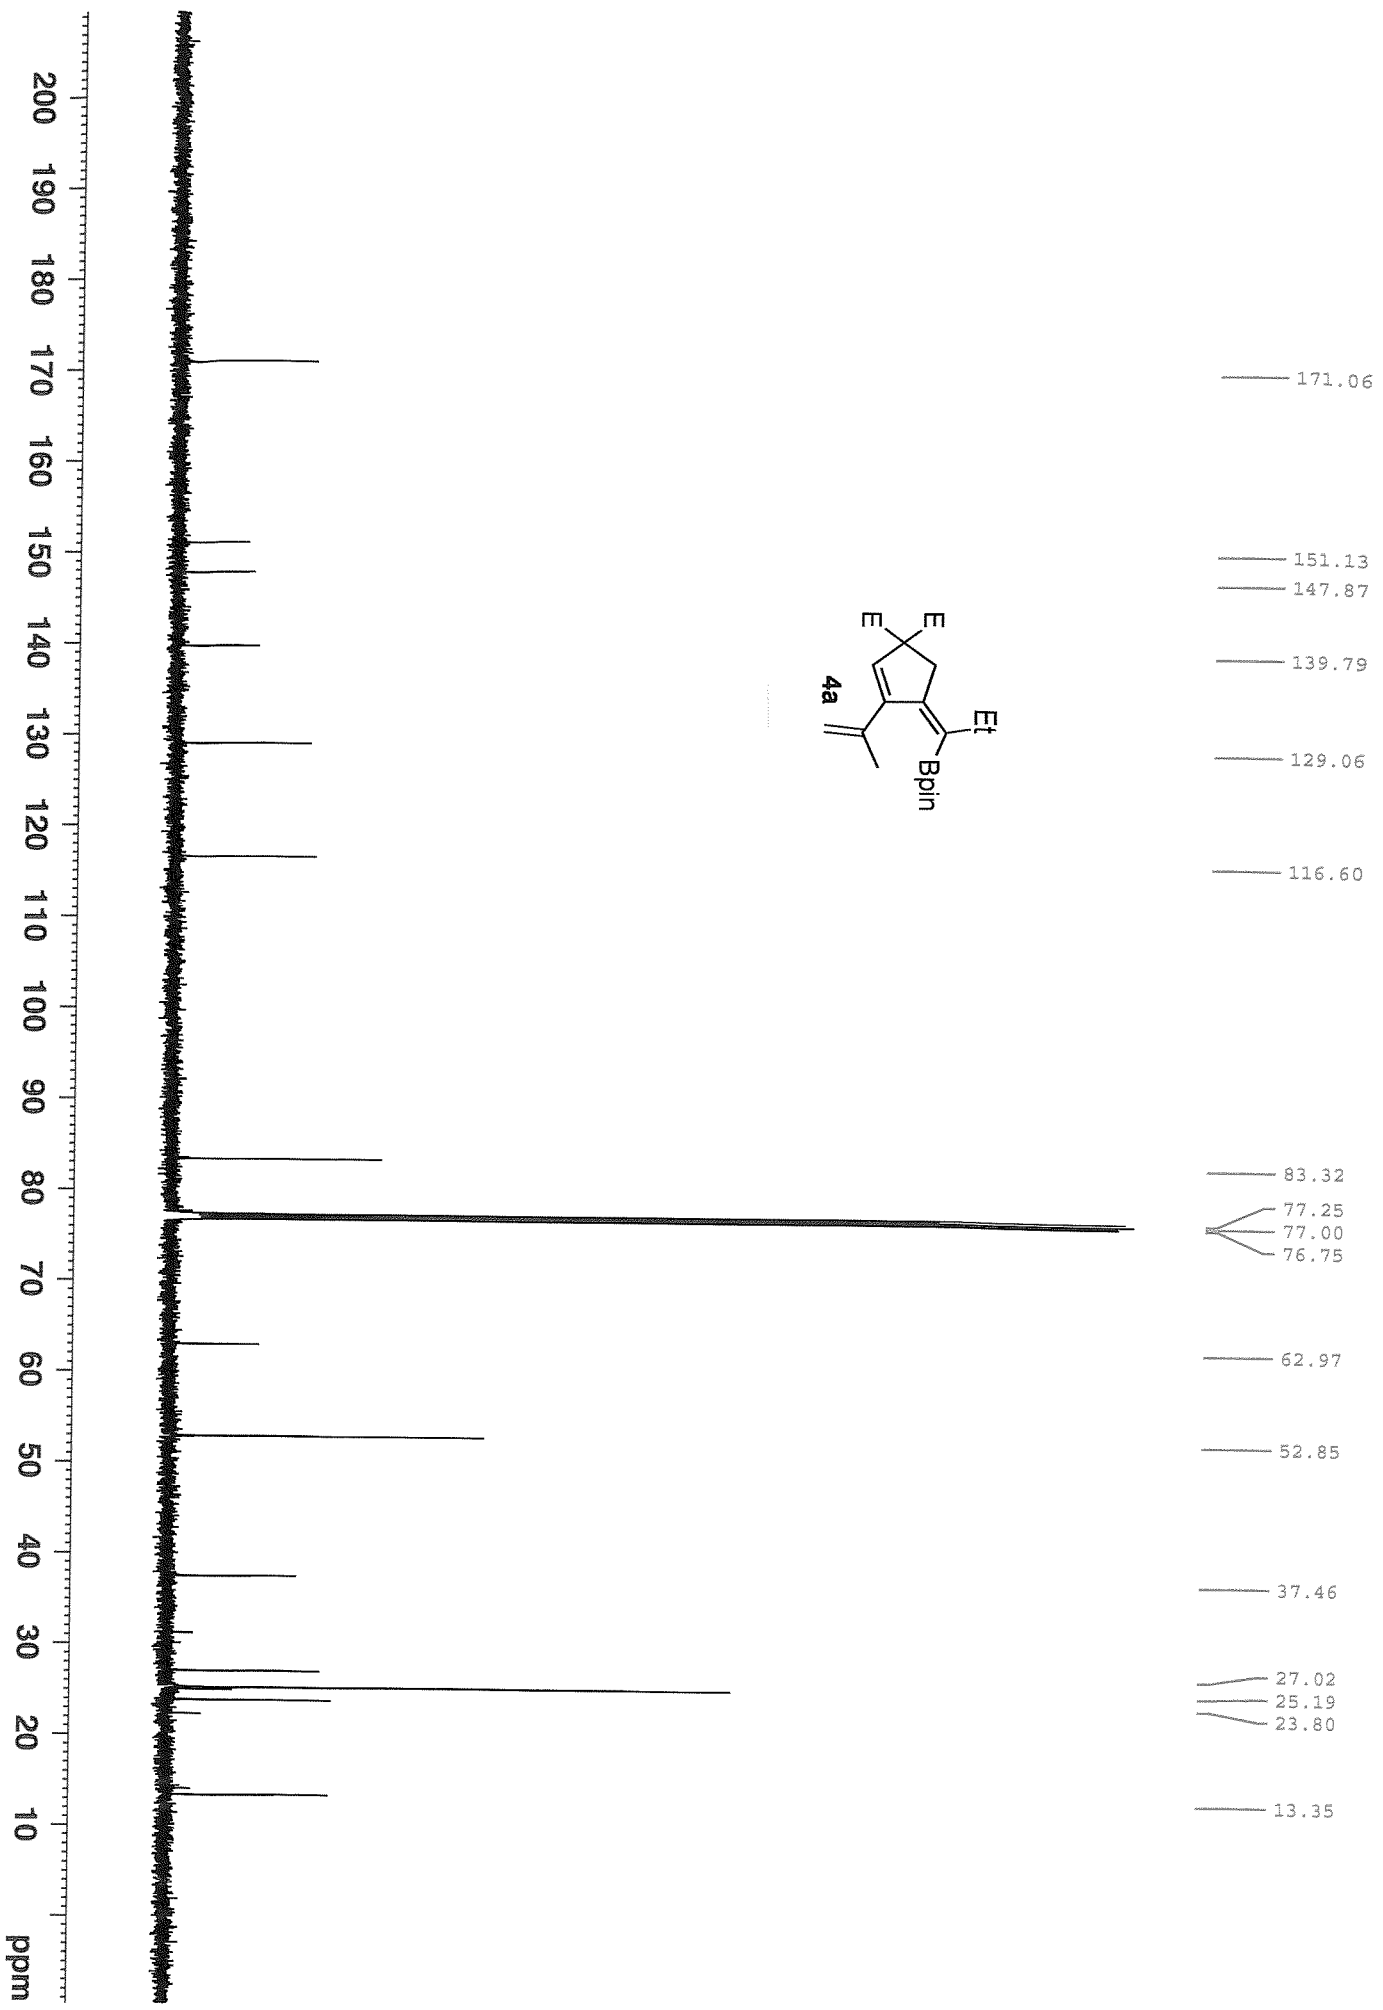



# Mass Spectrum SmartFormula Report

## Analysis Info

Analysis Name E:\Data2\Youqian\dyq-4-155000001.d  
Method Tune\_wide\_pos.m  
Sample Name dyq-4-155  
Comment

Acquisition Date 2012-11-13 14:42:51

Operator Carin Larsson  
Instrument / Ser# micrOTOF 125

## Acquisition Parameter

|             |            |                      |          |                  |           |
|-------------|------------|----------------------|----------|------------------|-----------|
| Source Type | ESI        | Ion Polarity         | Positive | Set Nebulizer    | 0.3 Bar   |
| Focus       | Not active |                      |          | Set Dry Heater   | 180 °C    |
| Scan Begin  | 50 m/z     | Set Capillary        | 4500 V   | Set Dry Gas      | 4.0 l/min |
| Scan End    | 3000 m/z   | Set End Plate Offset | -500 V   | Set Divert Valve | Source    |

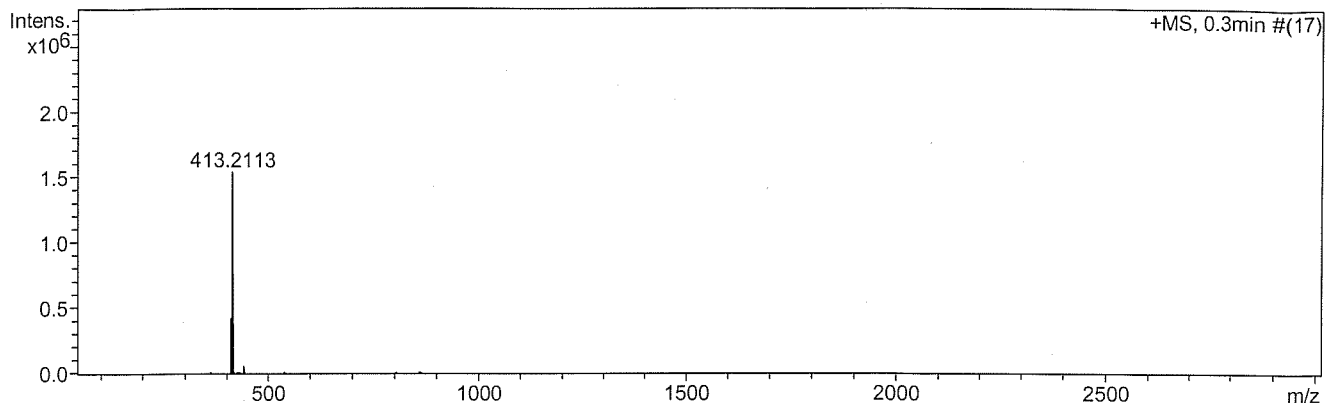

| Meas. m/z | # | Formula                                           | Score  | m/z      | err [mDa] | err [ppm] | mSigma | rdb | e <sup>-</sup> Conf | N-Rule |
|-----------|---|---------------------------------------------------|--------|----------|-----------|-----------|--------|-----|---------------------|--------|
| 413.2113  | 1 | C <sub>21</sub> H <sub>31</sub> BNaO <sub>6</sub> | 100.00 | 413.2110 | -0.3      | -0.8      | 37.7   | 6.5 | even                | ok     |

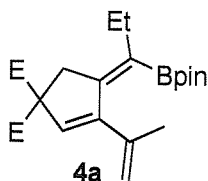

dyq-4-160noe-re 16 1 C:\Bruker\TOPSPIN

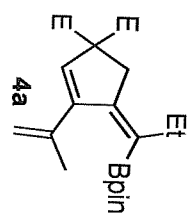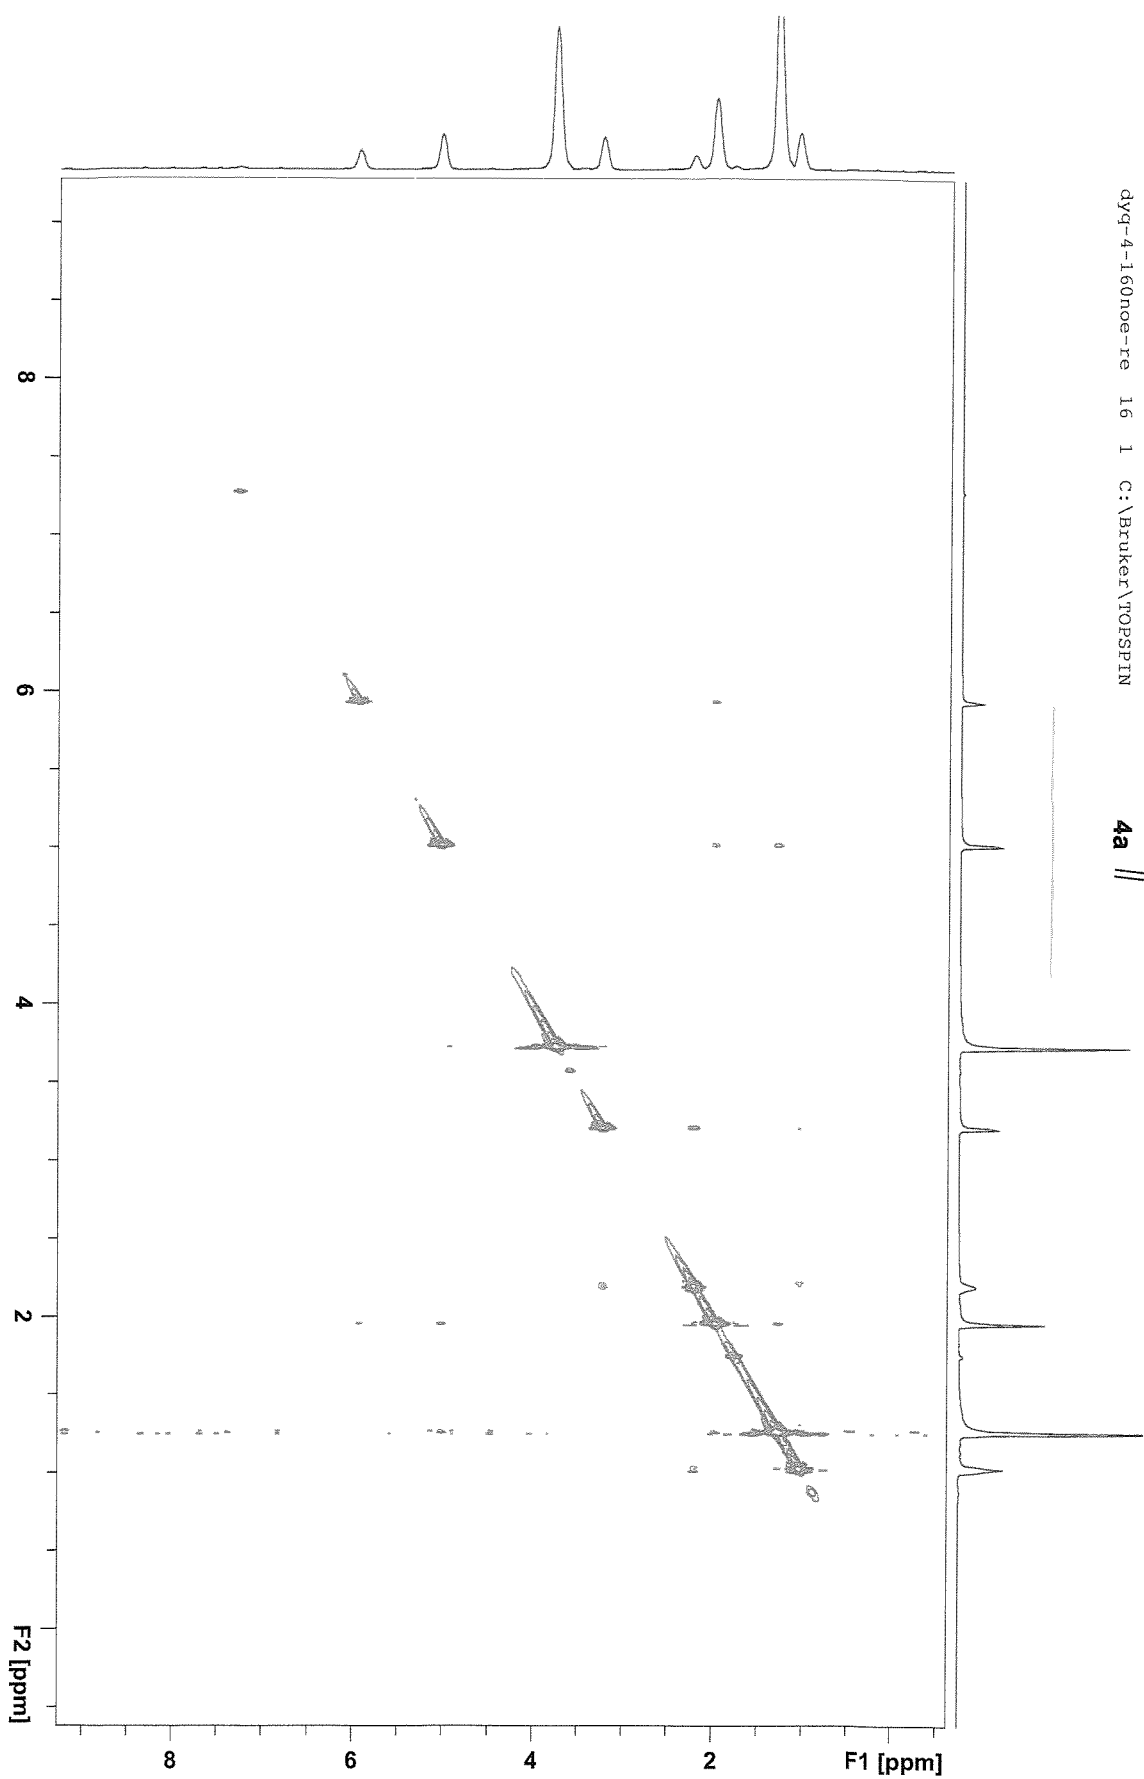

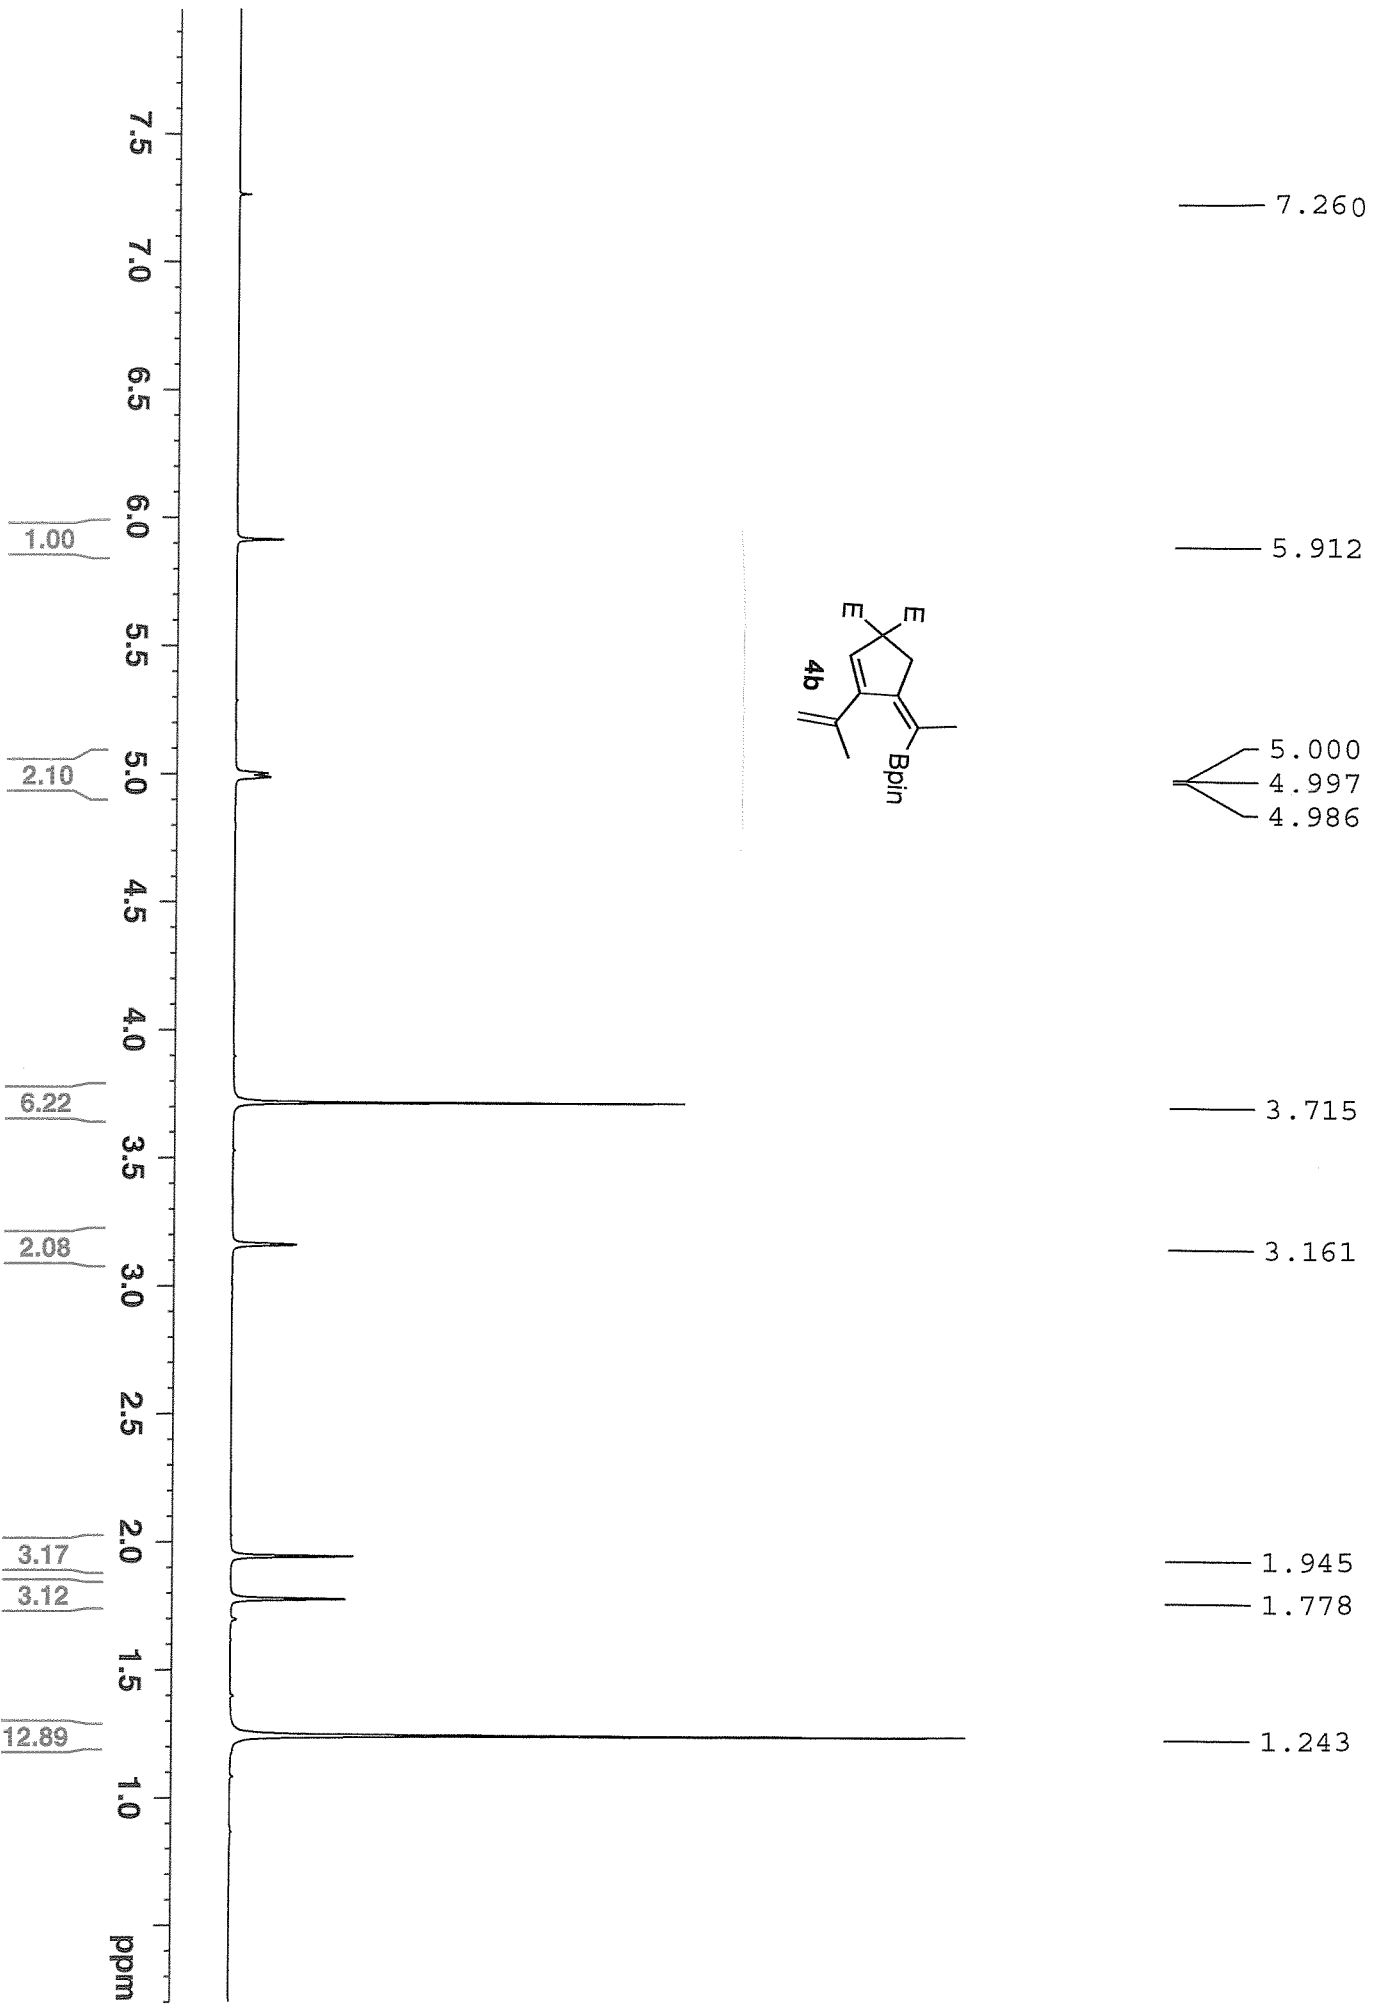

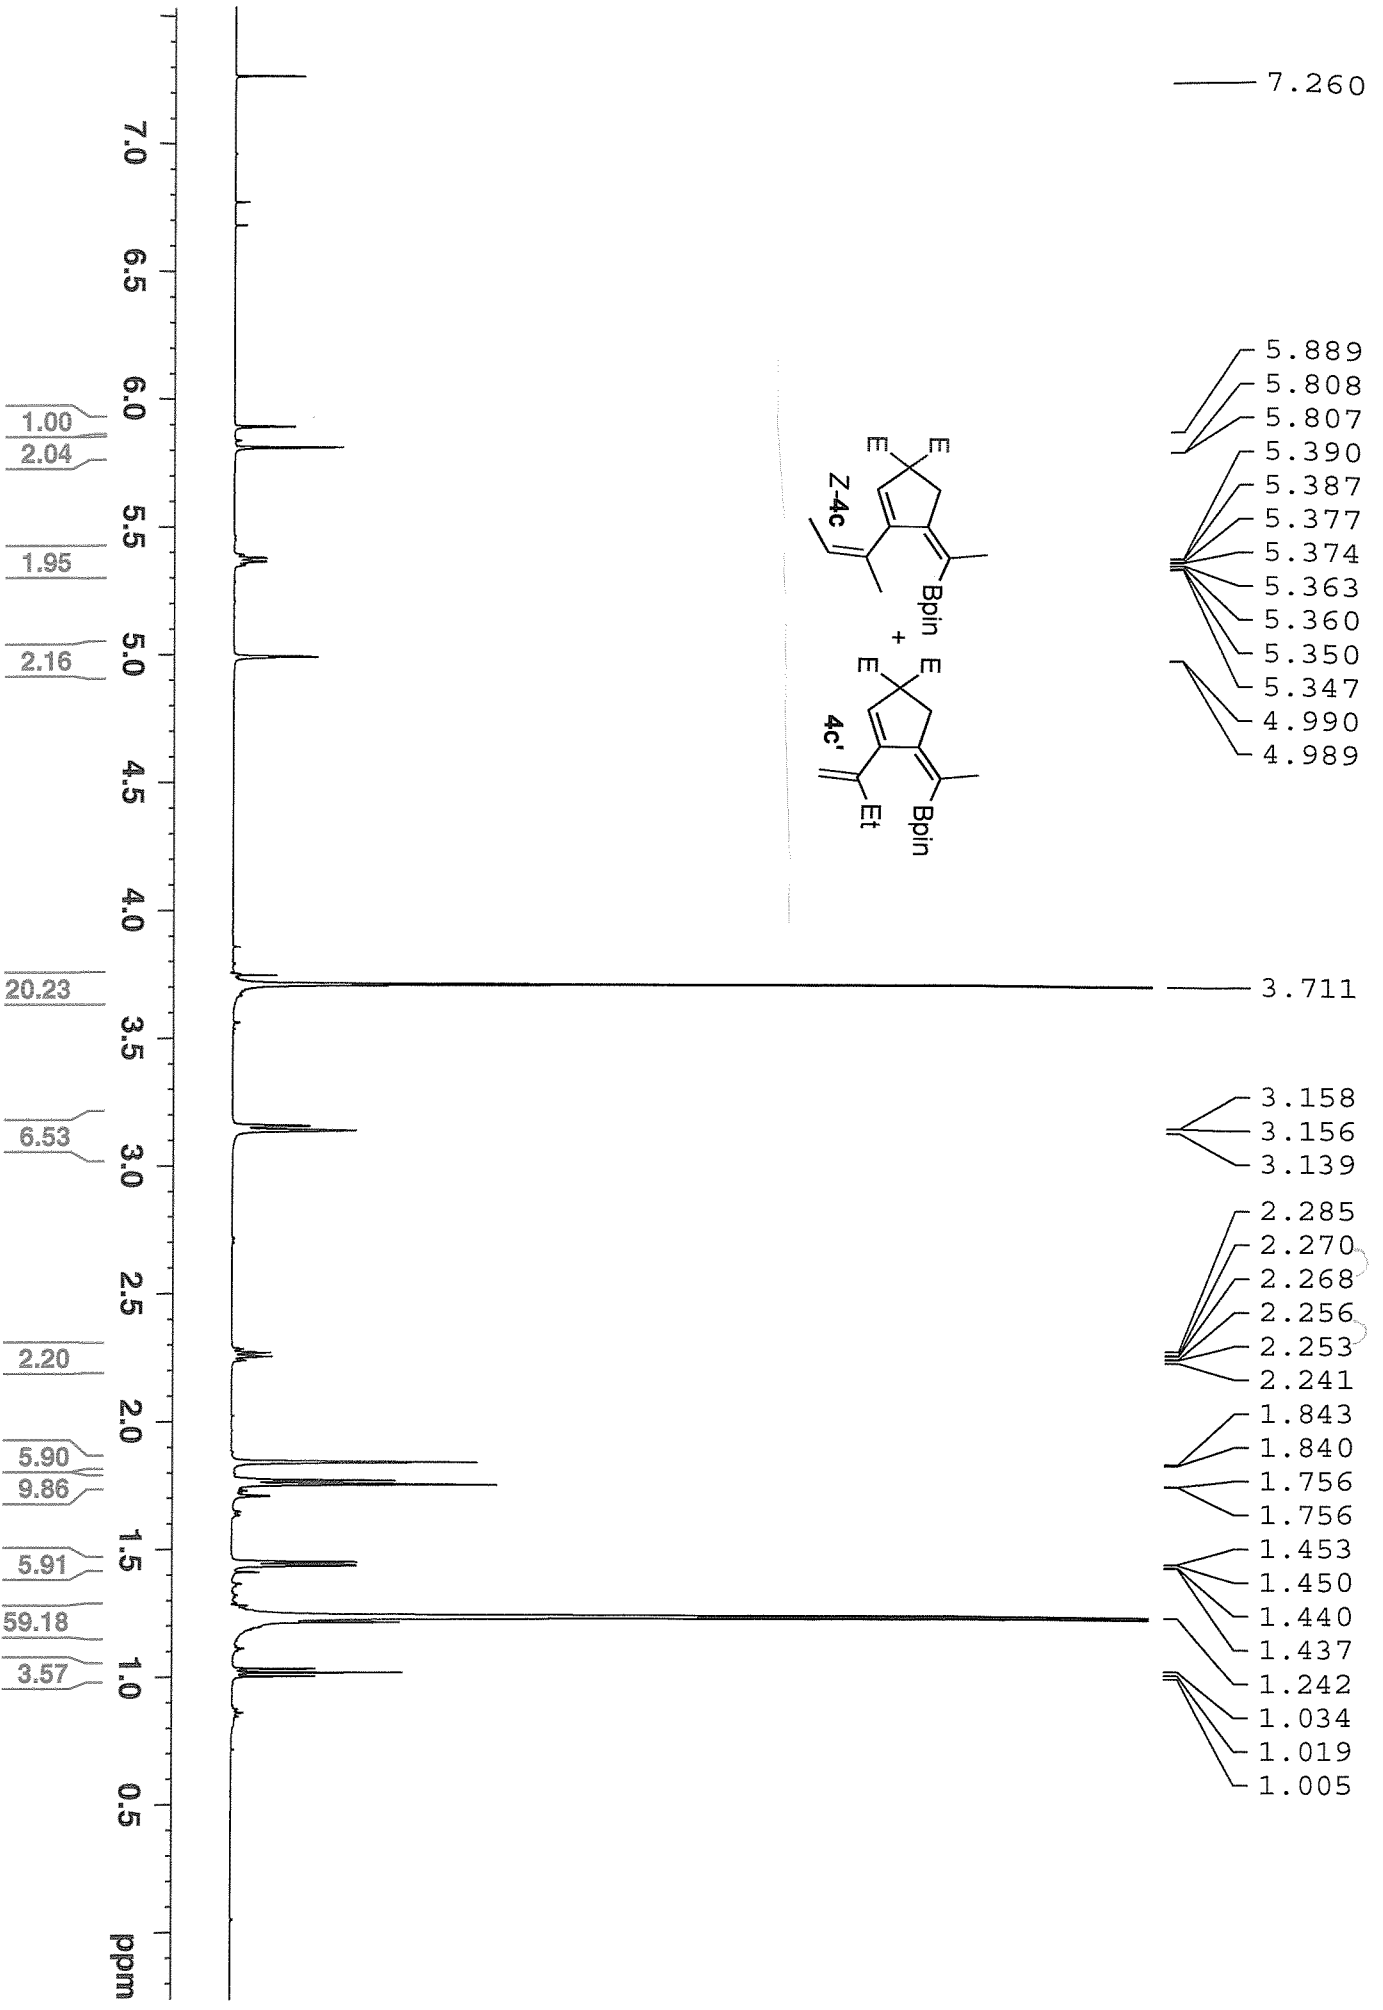

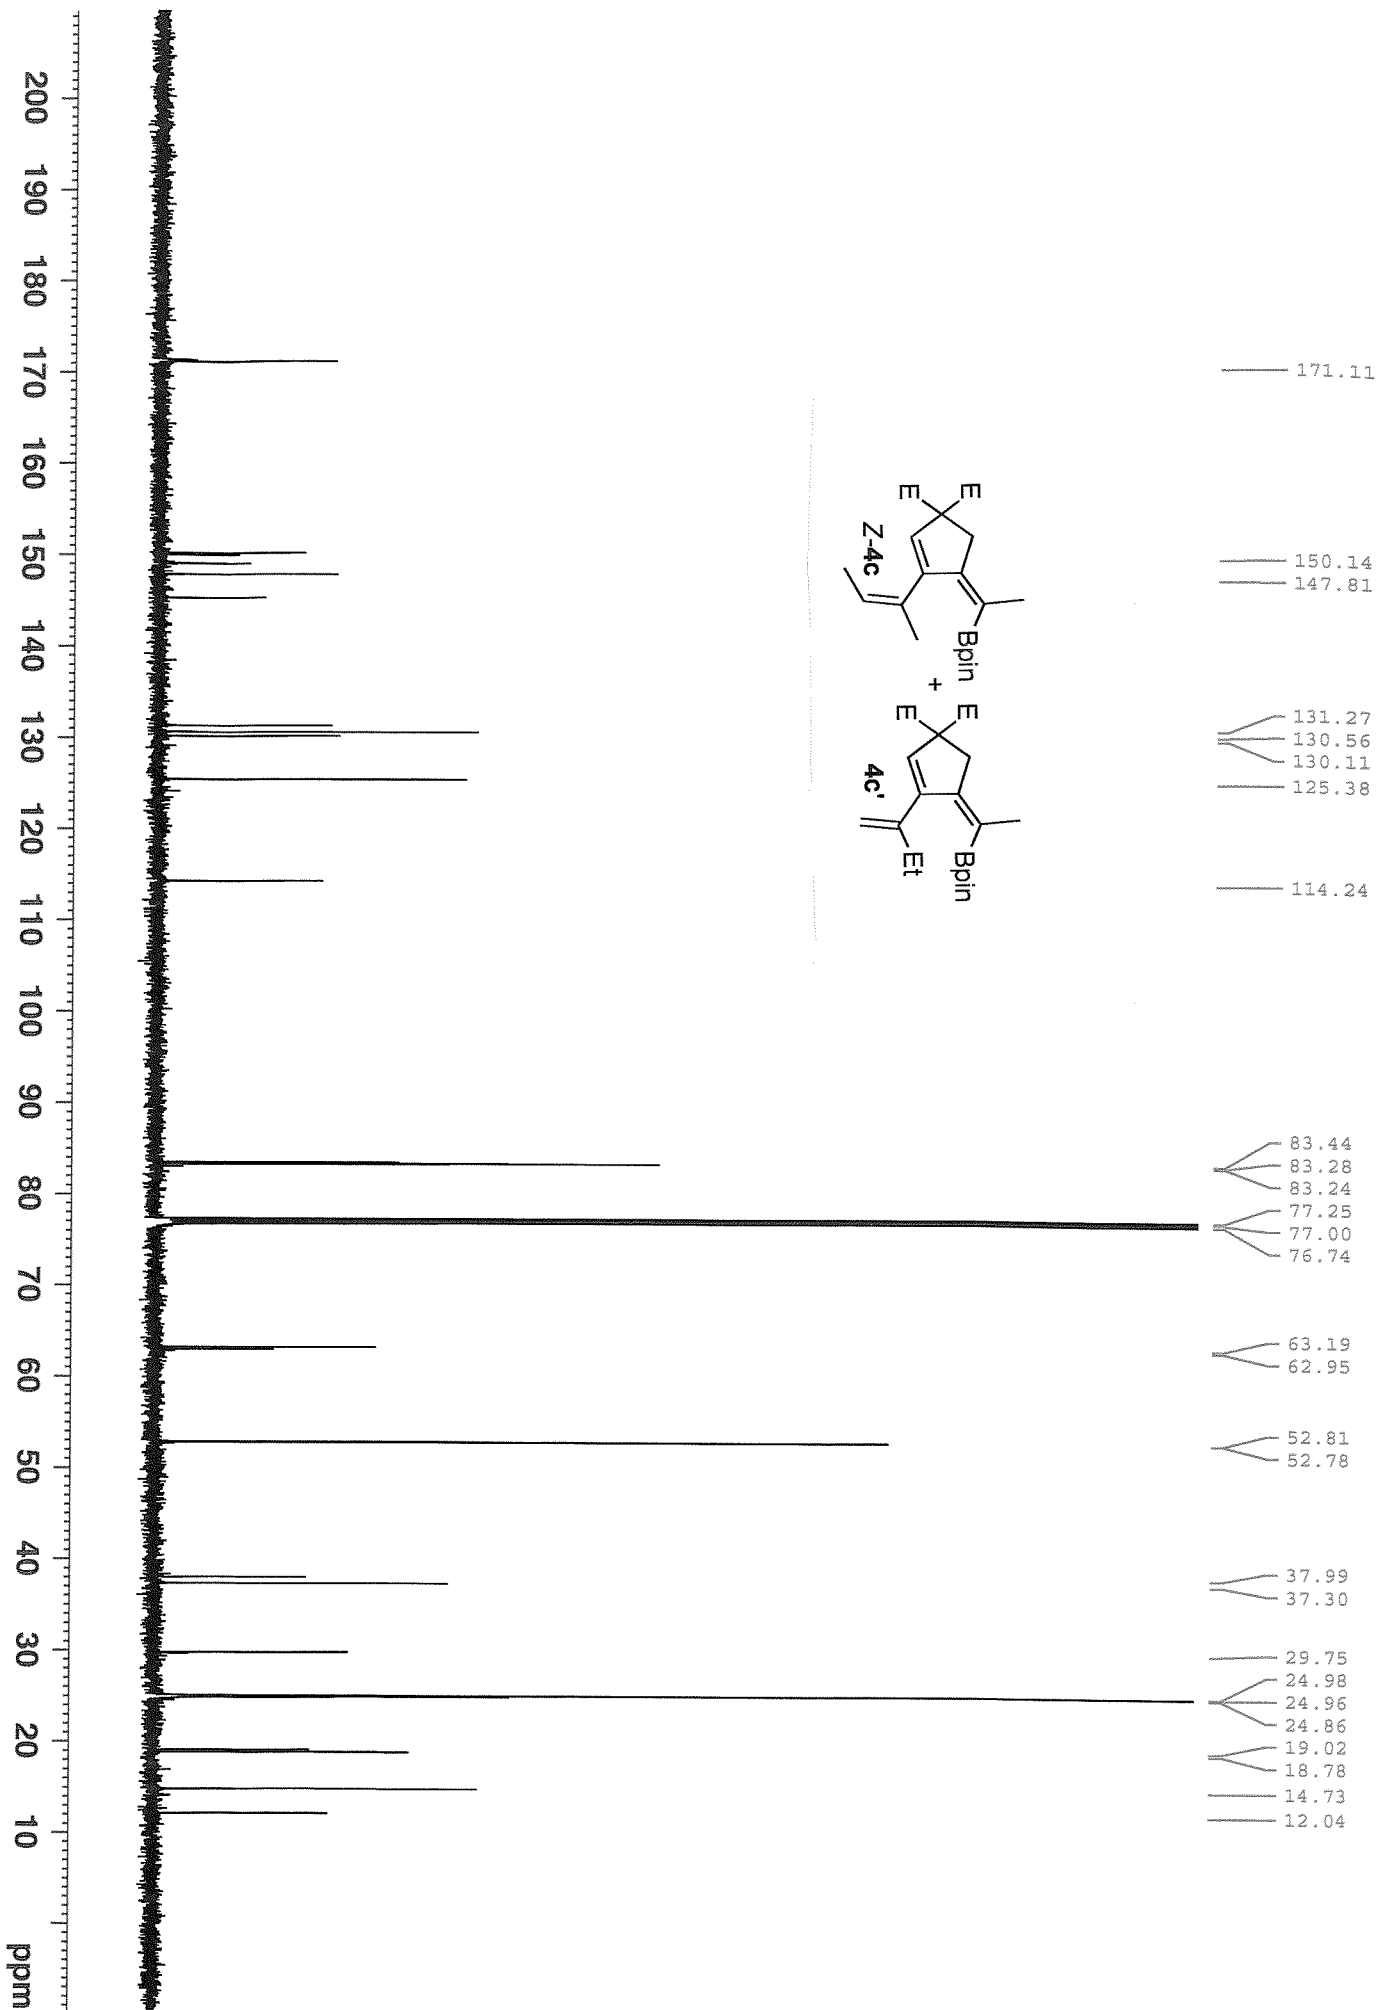

# Mass Spectrum SmartFormula Report

## Analysis Info

Analysis Name E:\Data2\Youqian\Teb-c-45000001.d  
Method Tune\_wide\_pos.m  
Sample Name Teb-c-45  
Comment

Acquisition Date 2012-11-16 18:00:56

Operator Carin Larsson  
Instrument / Ser# micrOTOF 125

## Acquisition Parameter

|             |            |                      |          |                  |           |
|-------------|------------|----------------------|----------|------------------|-----------|
| Source Type | ESI        | Ion Polarity         | Positive | Set Nebulizer    | 0.3 Bar   |
| Focus       | Not active |                      |          | Set Dry Heater   | 180 °C    |
| Scan Begin  | 50 m/z     | Set Capillary        | 4500 V   | Set Dry Gas      | 4.0 l/min |
| Scan End    | 3000 m/z   | Set End Plate Offset | -500 V   | Set Divert Valve | Source    |

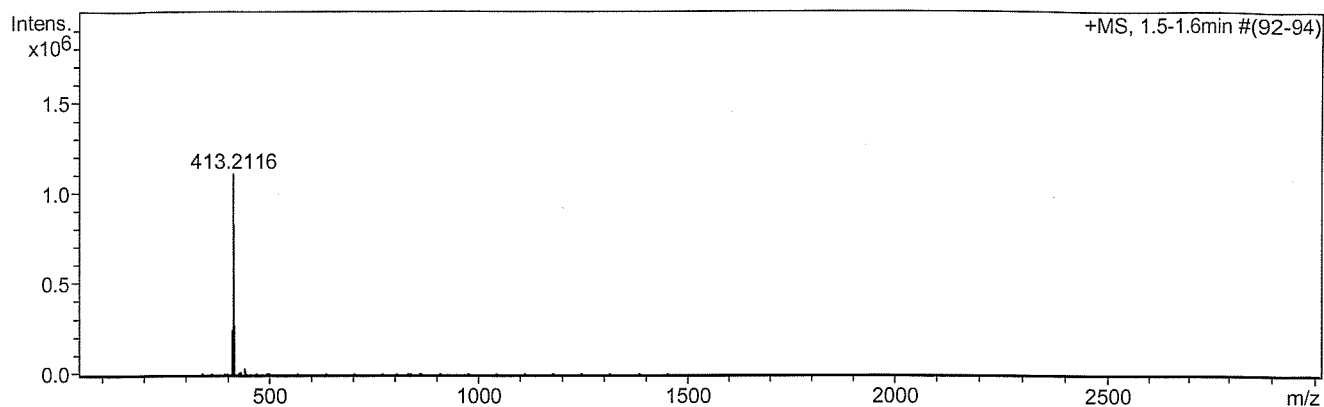

| Formula            | Meas. m/z | m/z      | err [ppm] | Mean err [ppm] |
|--------------------|-----------|----------|-----------|----------------|
| C 21 H 31 B Na O 6 | 413.2116  | 413.2110 | -1.6      | -1.0           |

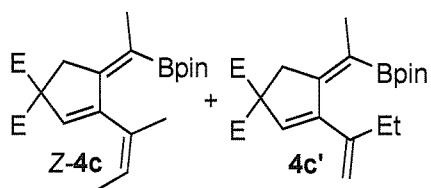

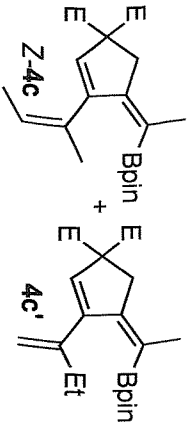

Teb-c-45-1-noe 16 1 C:\Bruker\TOPSPIN dyq

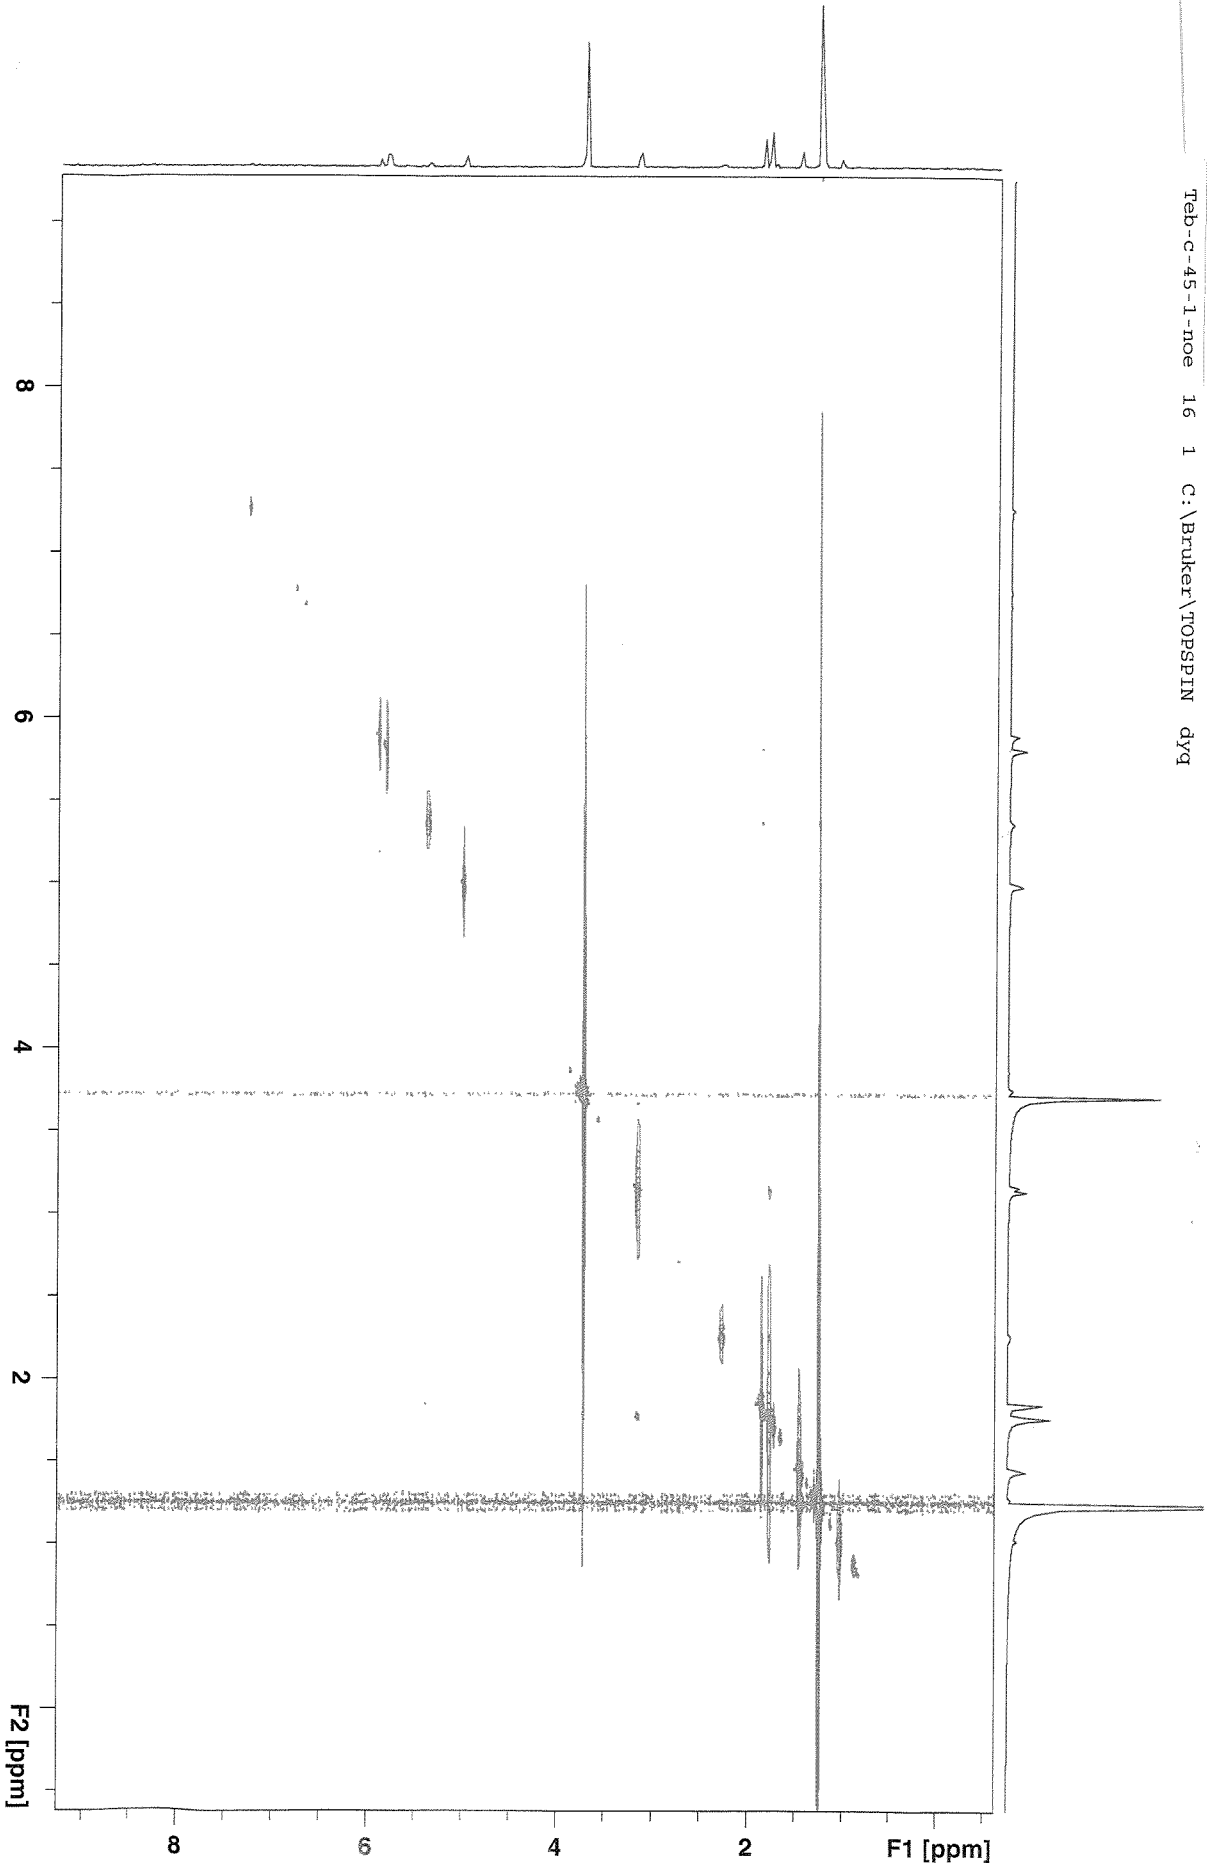

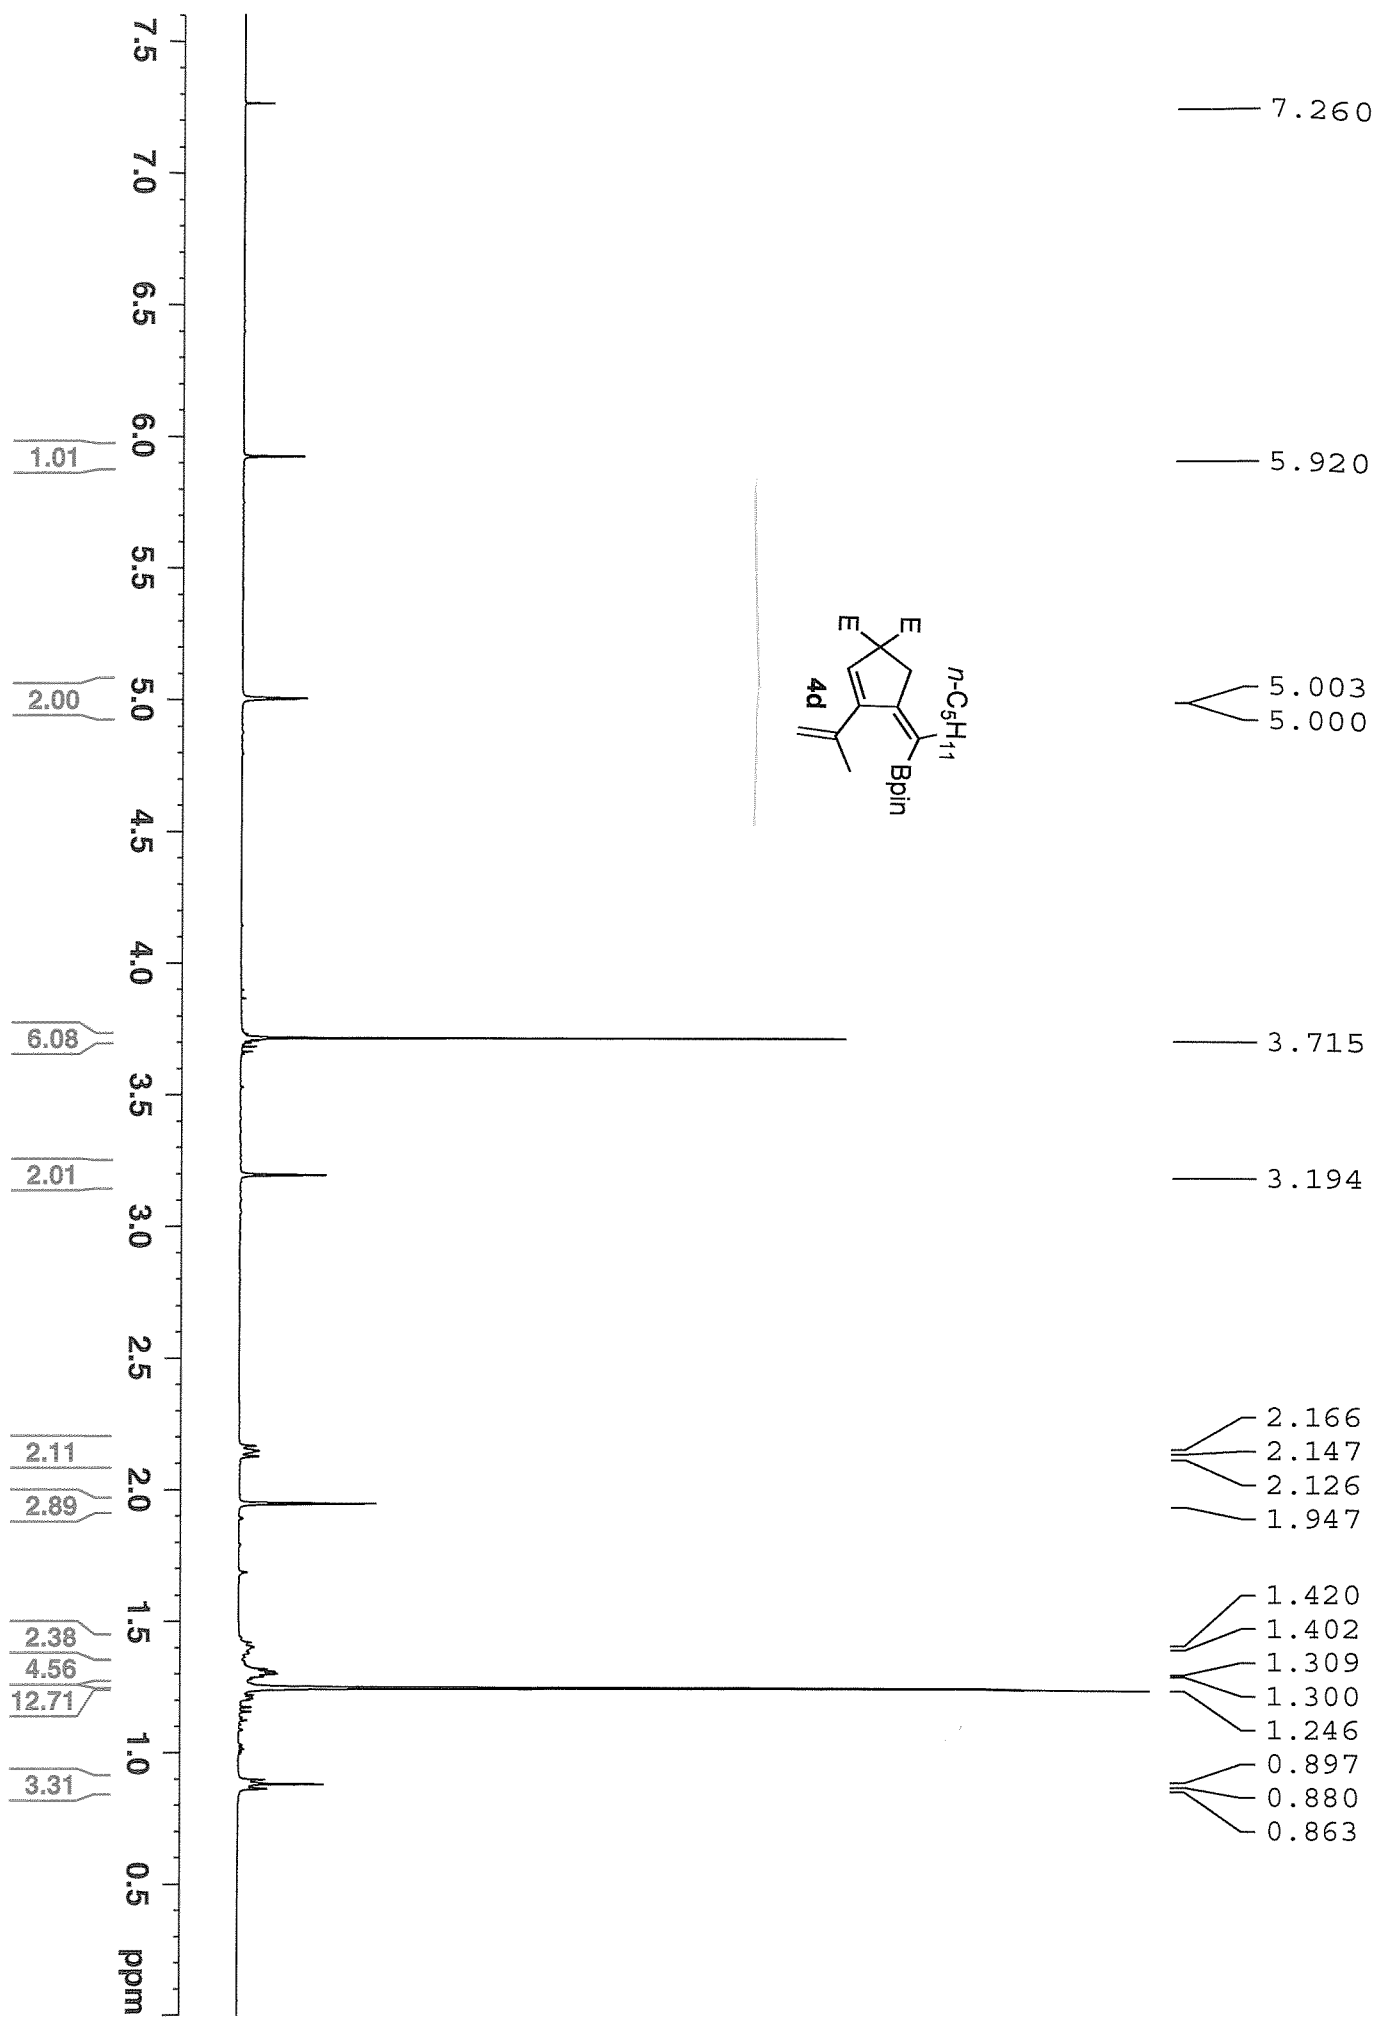



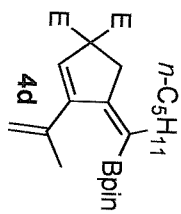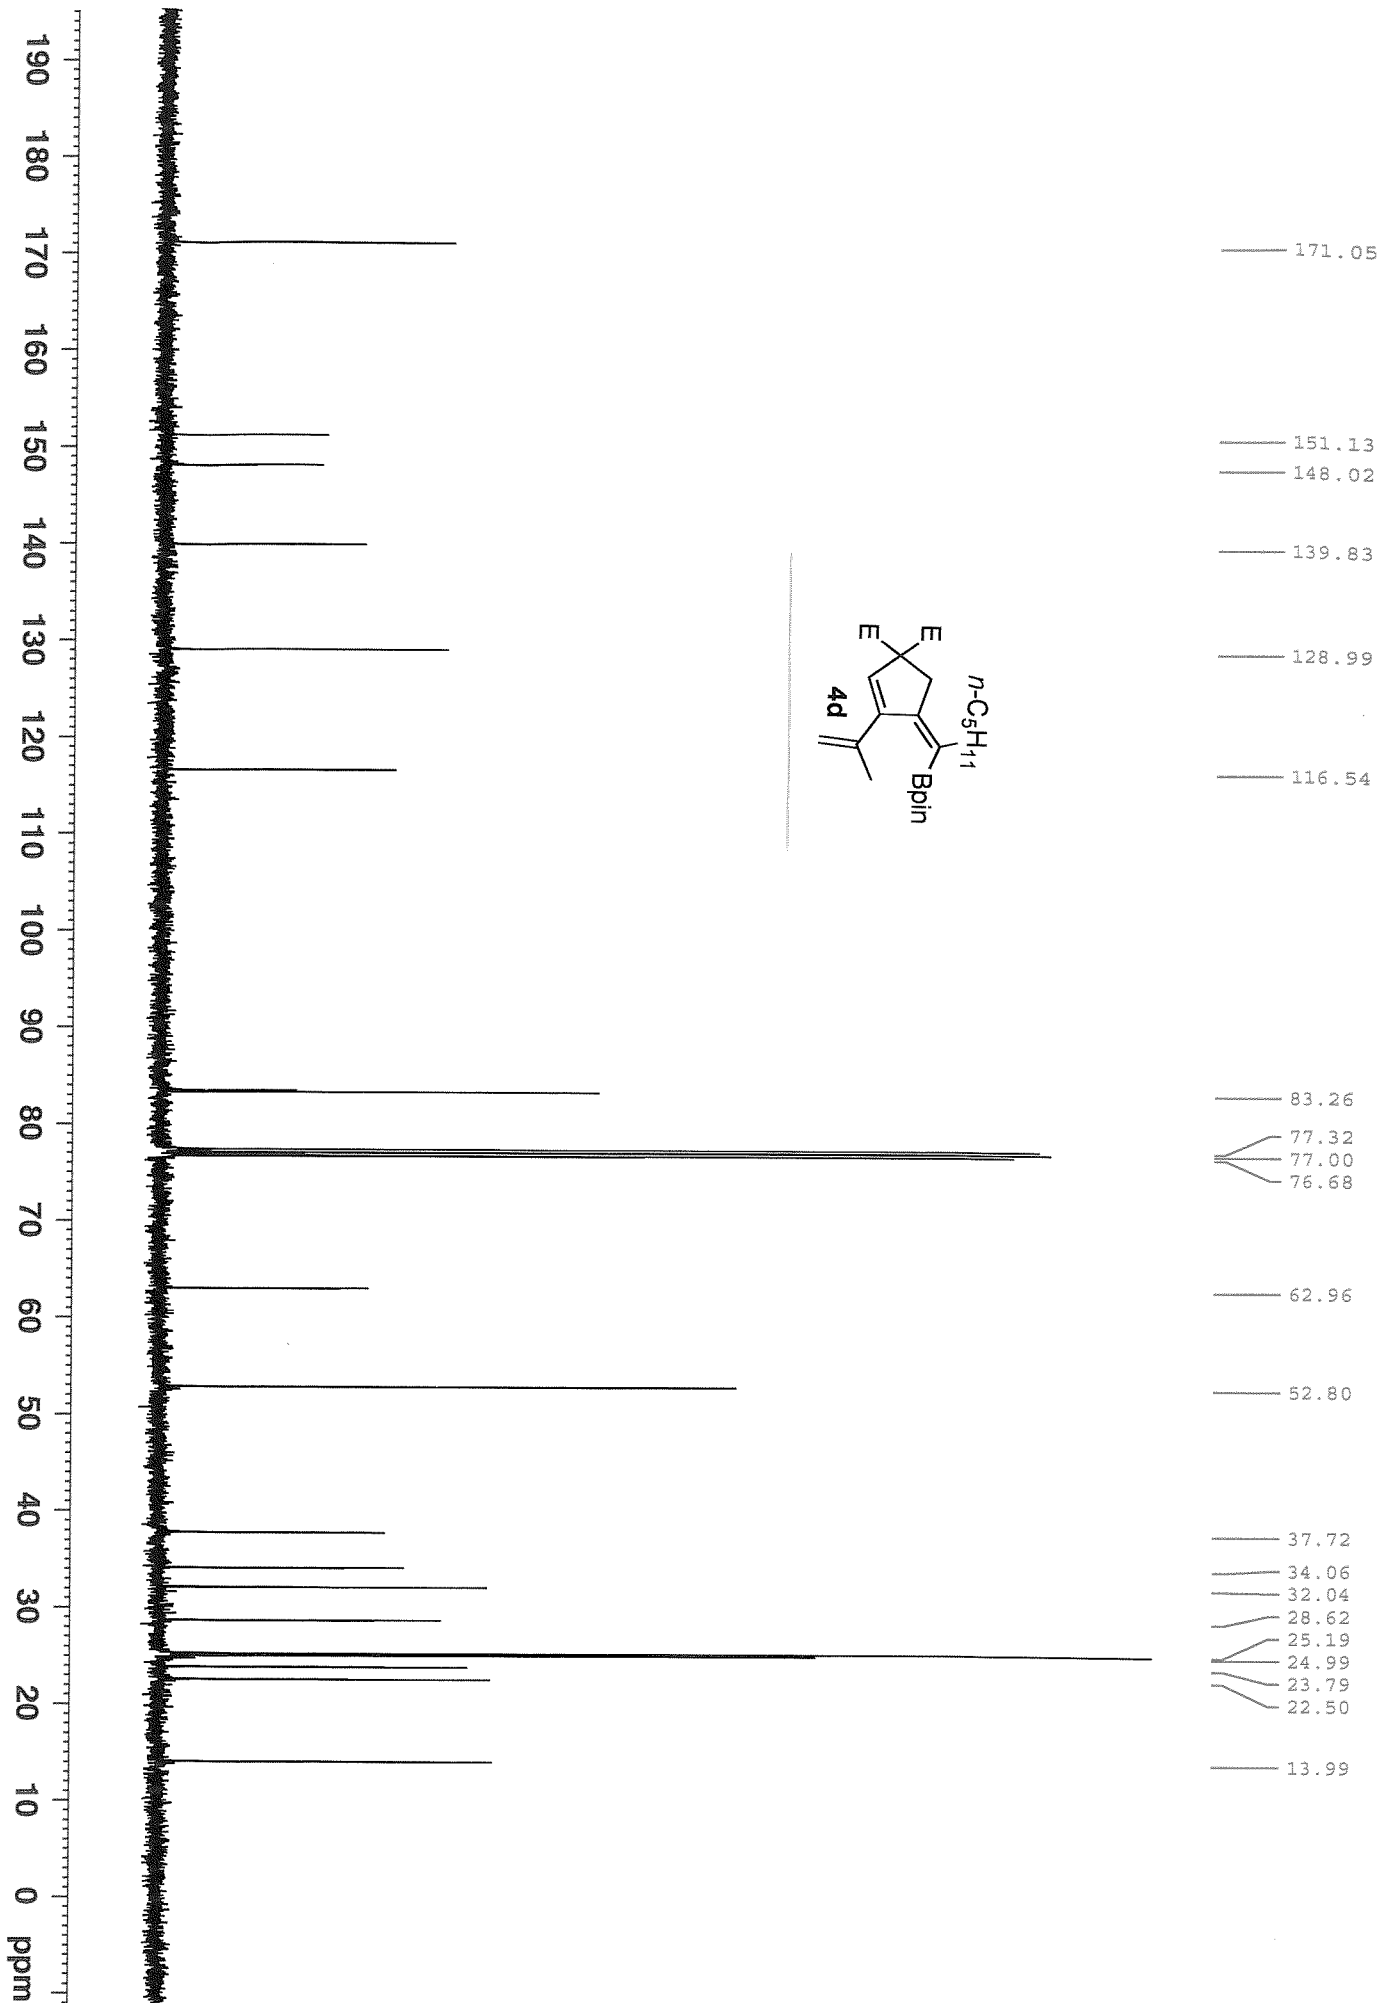

# Mass Spectrum SmartFormula Report

## Analysis Info

Analysis Name E:\Data2\Youqian\dyq-4-158-1000003.d  
Method Tune\_wide\_pos.m  
Sample Name dyq-4-158-1  
Comment

Acquisition Date 2012-11-13 19:03:54

Operator Carin Larsson  
Instrument / Ser# micrOTOF 125

## Acquisition Parameter

|             |            |                      |          |                  |           |
|-------------|------------|----------------------|----------|------------------|-----------|
| Source Type | ESI        | Ion Polarity         | Positive | Set Nebulizer    | 0.3 Bar   |
| Focus       | Not active |                      |          | Set Dry Heater   | 180 °C    |
| Scan Begin  | 50 m/z     | Set Capillary        | 4500 V   | Set Dry Gas      | 4.0 l/min |
| Scan End    | 3000 m/z   | Set End Plate Offset | -500 V   | Set Divert Valve | Source    |

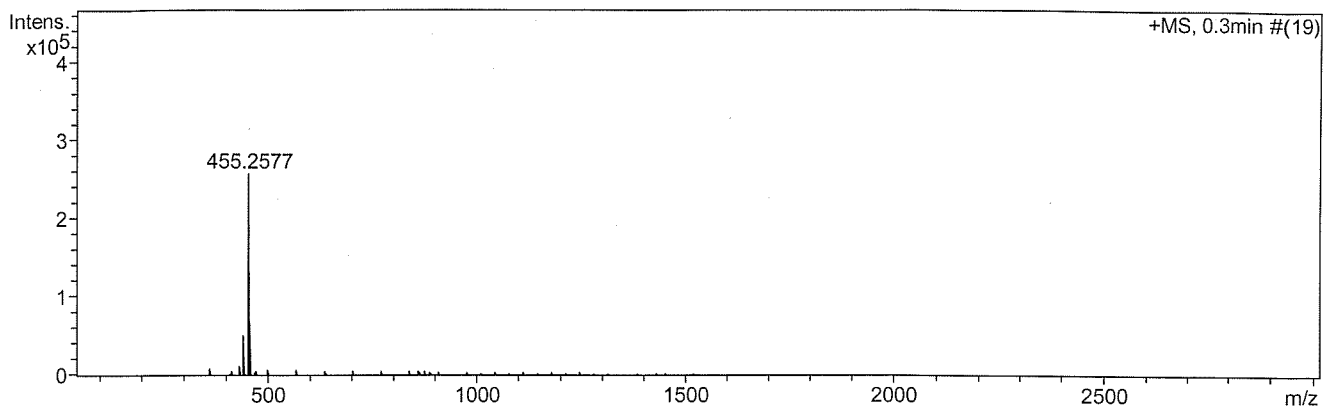

| Meas. m/z | # | Formula                                           | Score  | m/z      | err [mDa] | err [ppm] | mSigma | rdb | e <sup>-</sup> Conf | N-Rule |
|-----------|---|---------------------------------------------------|--------|----------|-----------|-----------|--------|-----|---------------------|--------|
| 455.2577  | 1 | C <sub>24</sub> H <sub>37</sub> BNaO <sub>6</sub> | 100.00 | 455.2580 | 0.2       | 0.5       | 14.2   | 6.5 | even                | ok     |

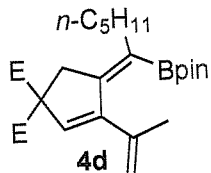

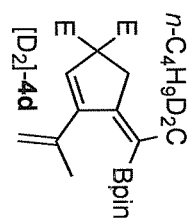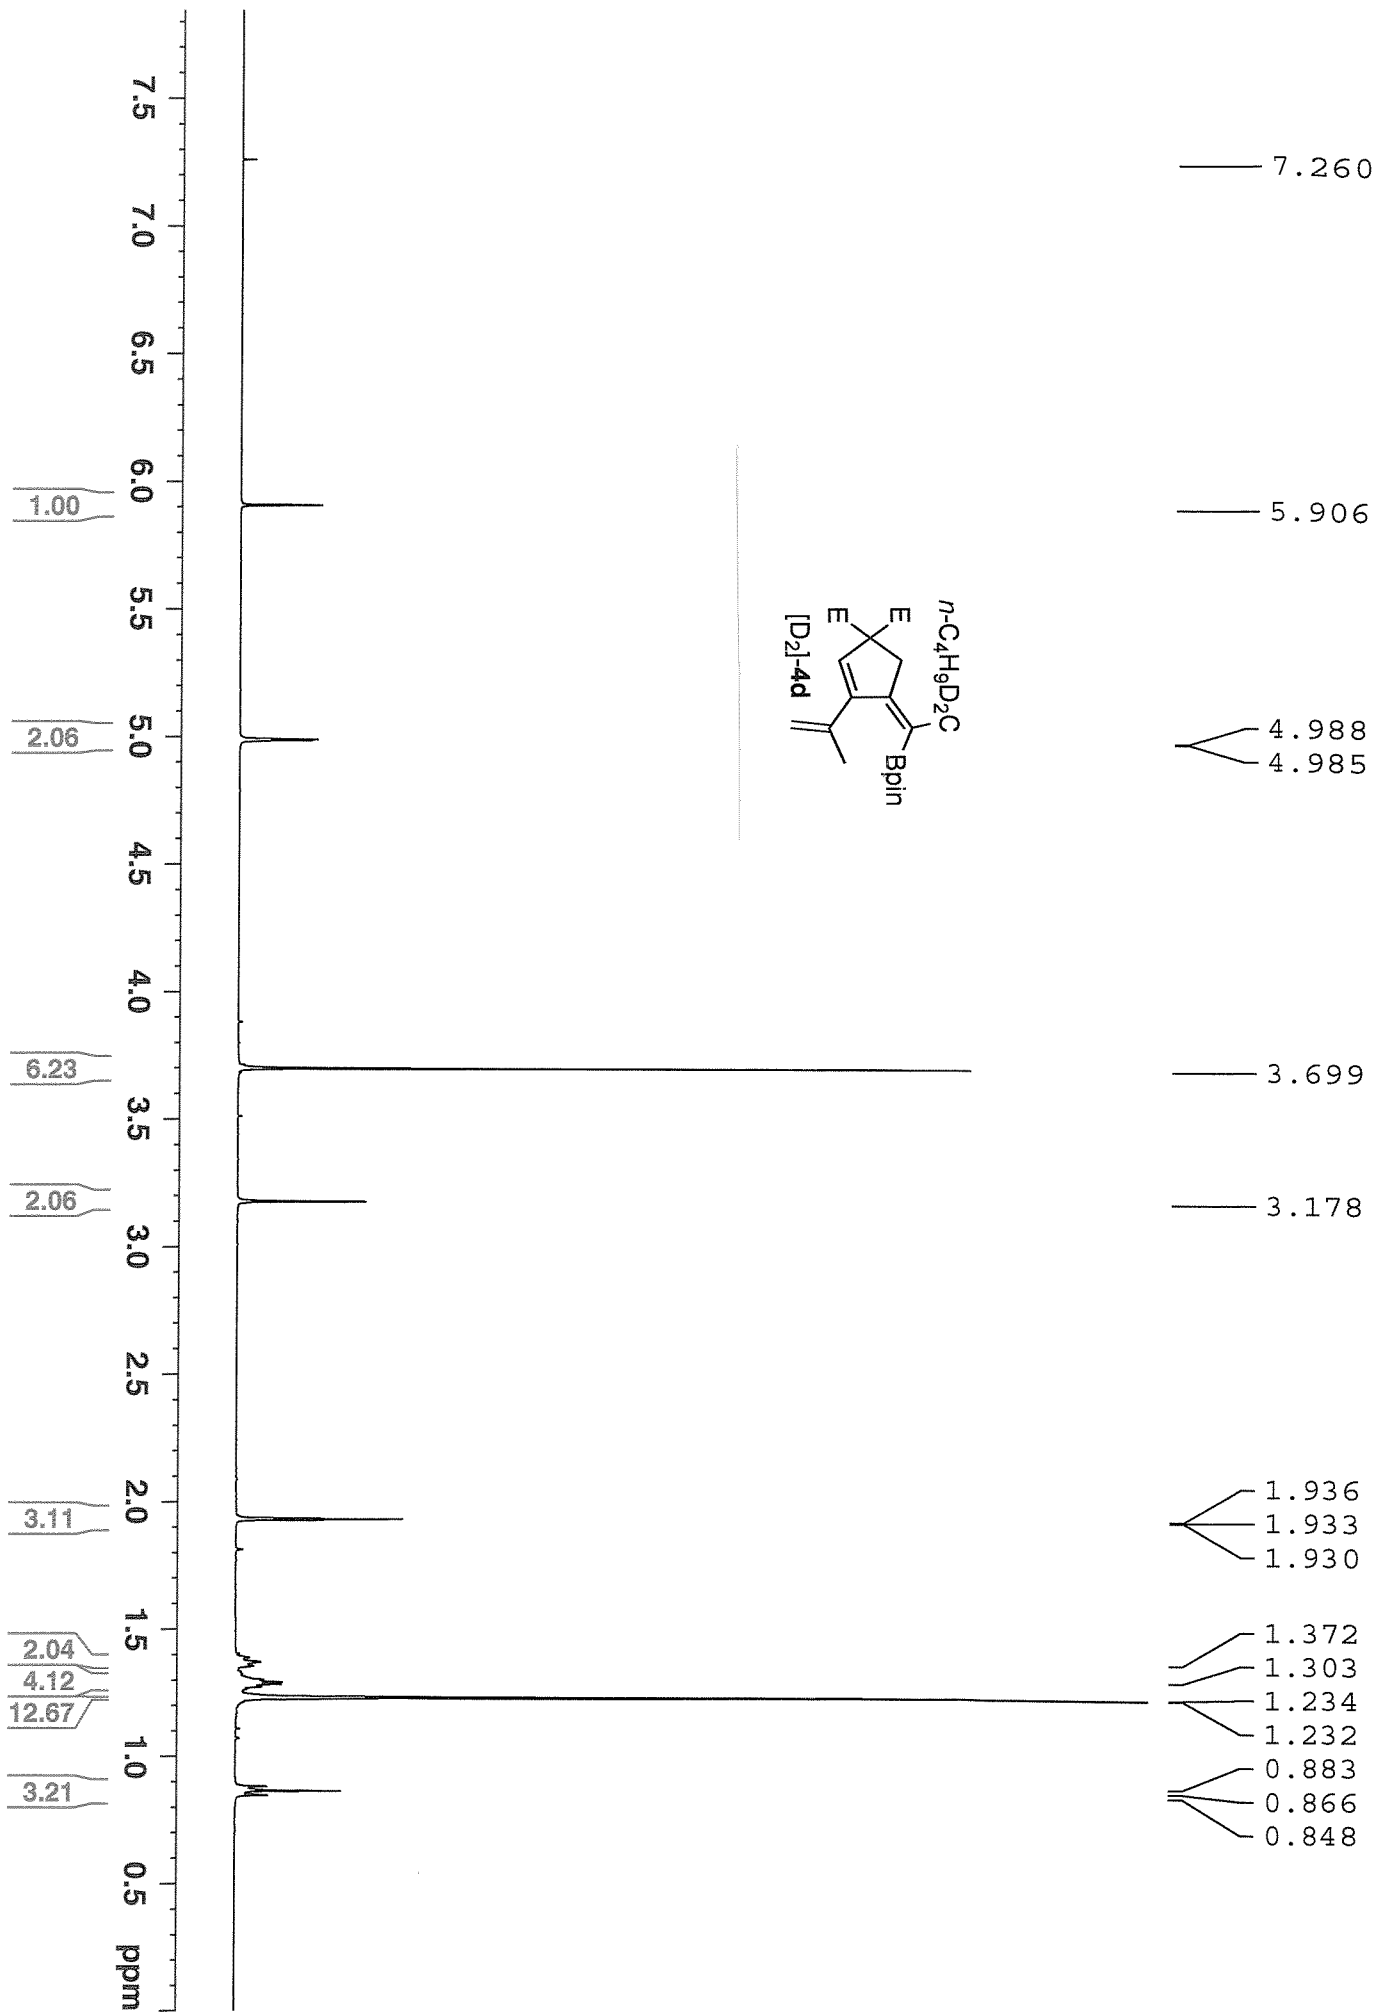

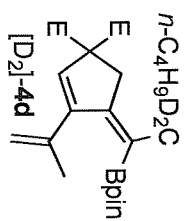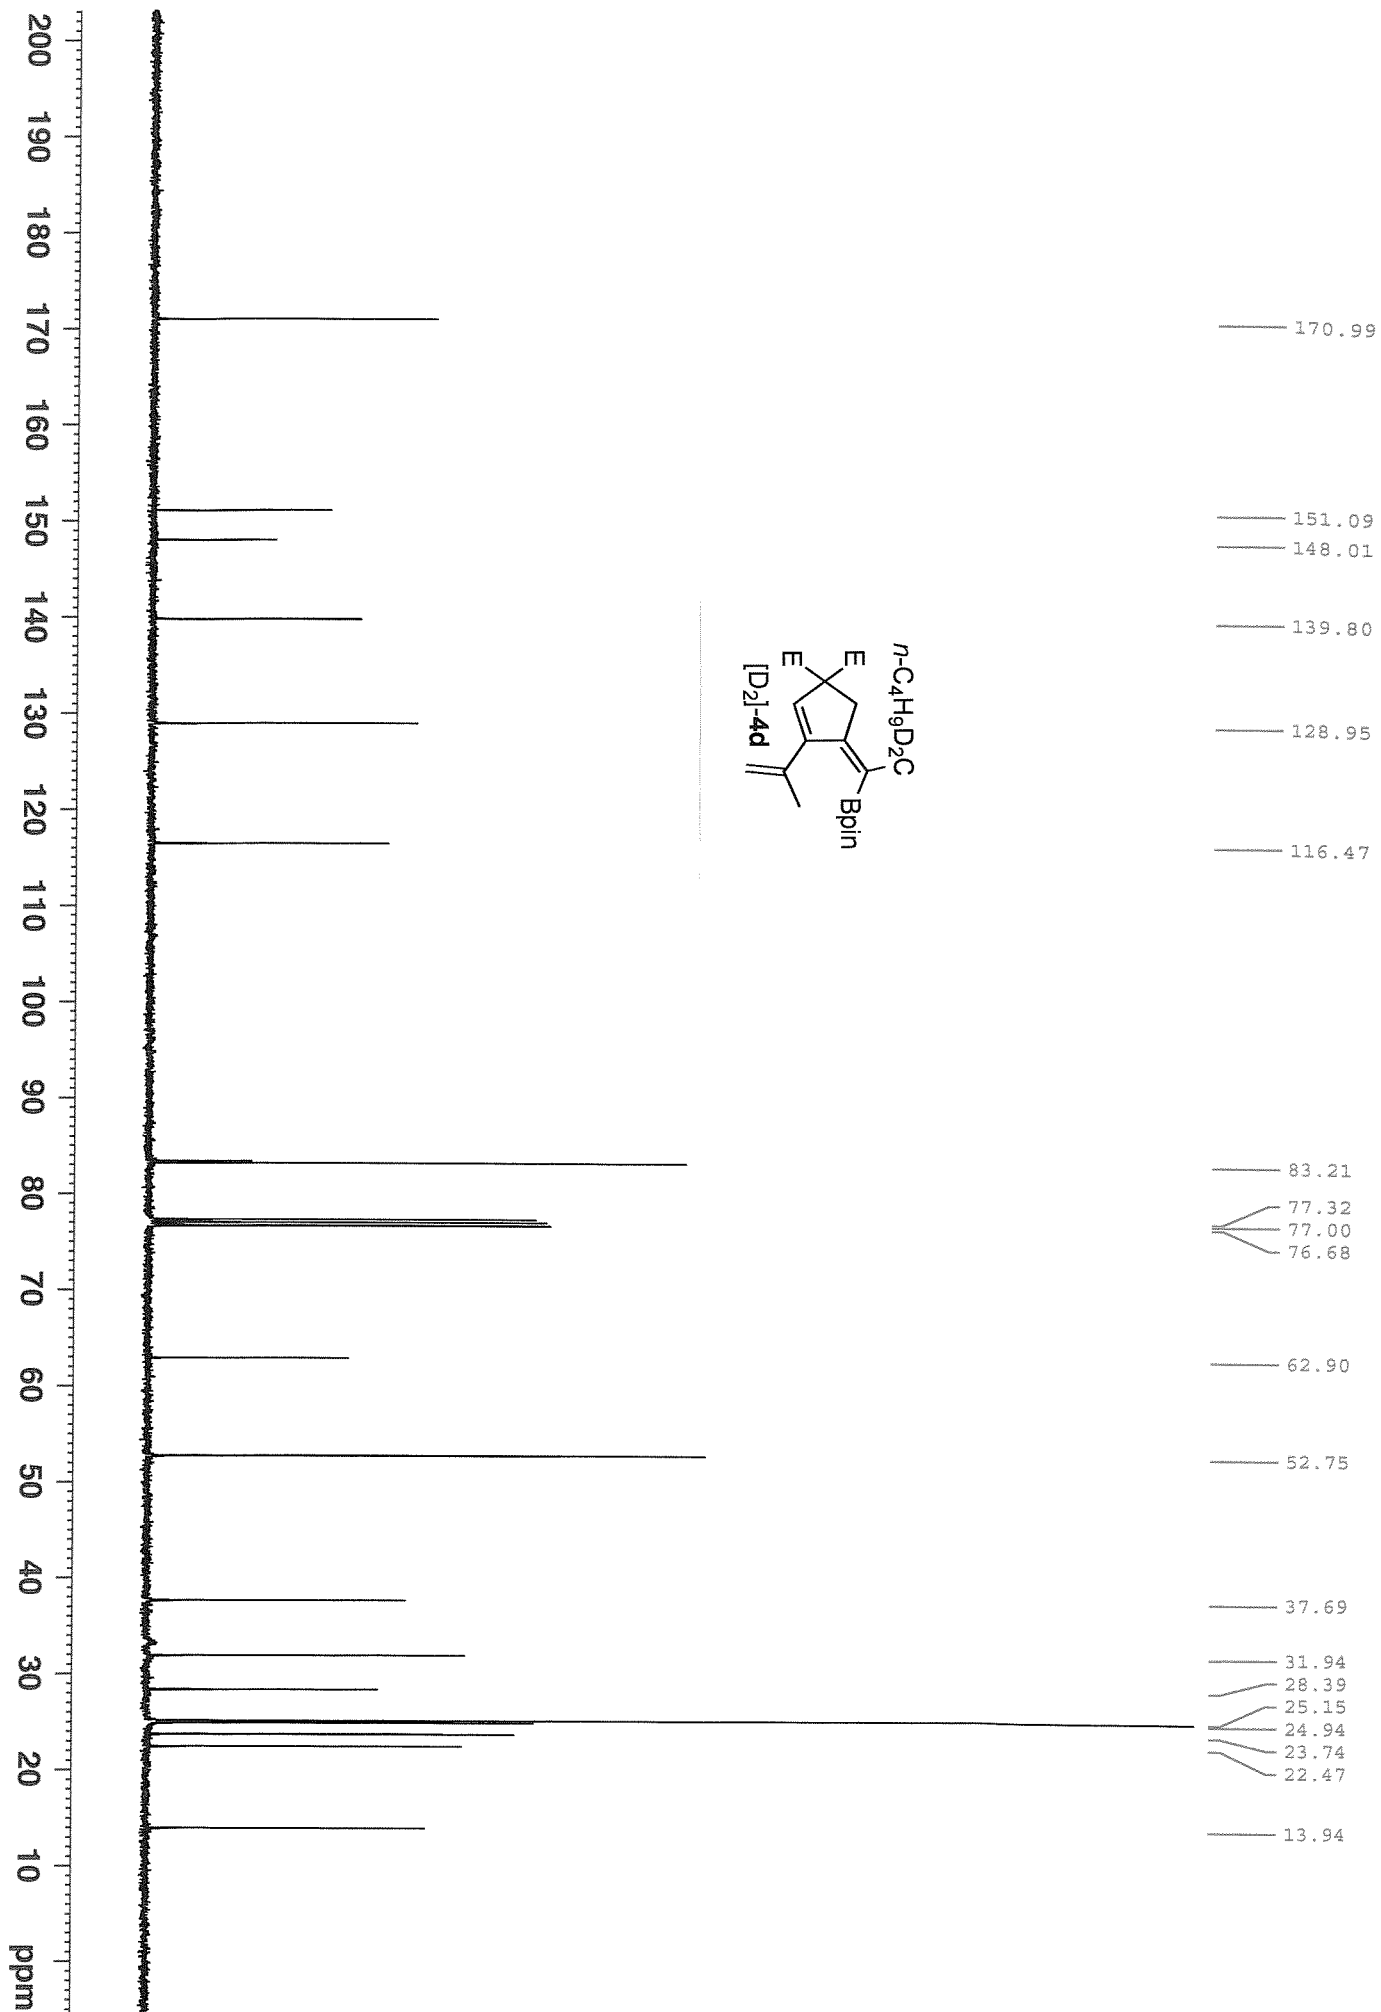

# Mass Spectrum SmartFormula Report

## Analysis Info

Analysis Name E:\Data2\Youqian\dyq-4-182000001.d  
Method Tune\_low\_pos.m  
Sample Name dyq-4-182  
Comment

Acquisition Date 2012-12-07 18:28:51

Operator Carin Larsson  
Instrument / Ser# micrOTOF 125

## Acquisition Parameter

|             |            |                      |          |                  |           |
|-------------|------------|----------------------|----------|------------------|-----------|
| Source Type | ESI        | Ion Polarity         | Positive | Set Nebulizer    | 0.4 Bar   |
| Focus       | Not active |                      |          | Set Dry Heater   | 180 °C    |
| Scan Begin  | 50 m/z     | Set Capillary        | 4000 V   | Set Dry Gas      | 4.0 l/min |
| Scan End    | 1000 m/z   | Set End Plate Offset | -500 V   | Set Divert Valve | Source    |

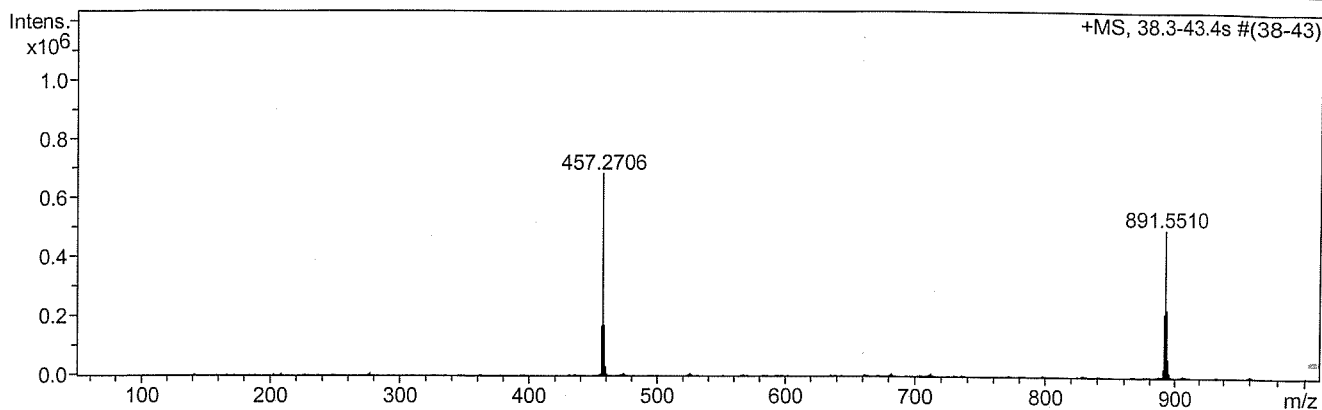

| Formula                | Meas. m/z | m/z      | err [ppm] | Mean err [ppm] |
|------------------------|-----------|----------|-----------|----------------|
| C 24 H 35 B D 2 Na O 6 | 457.2706  | 457.2705 | -0.2      | 0.0            |

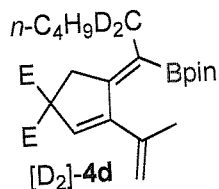

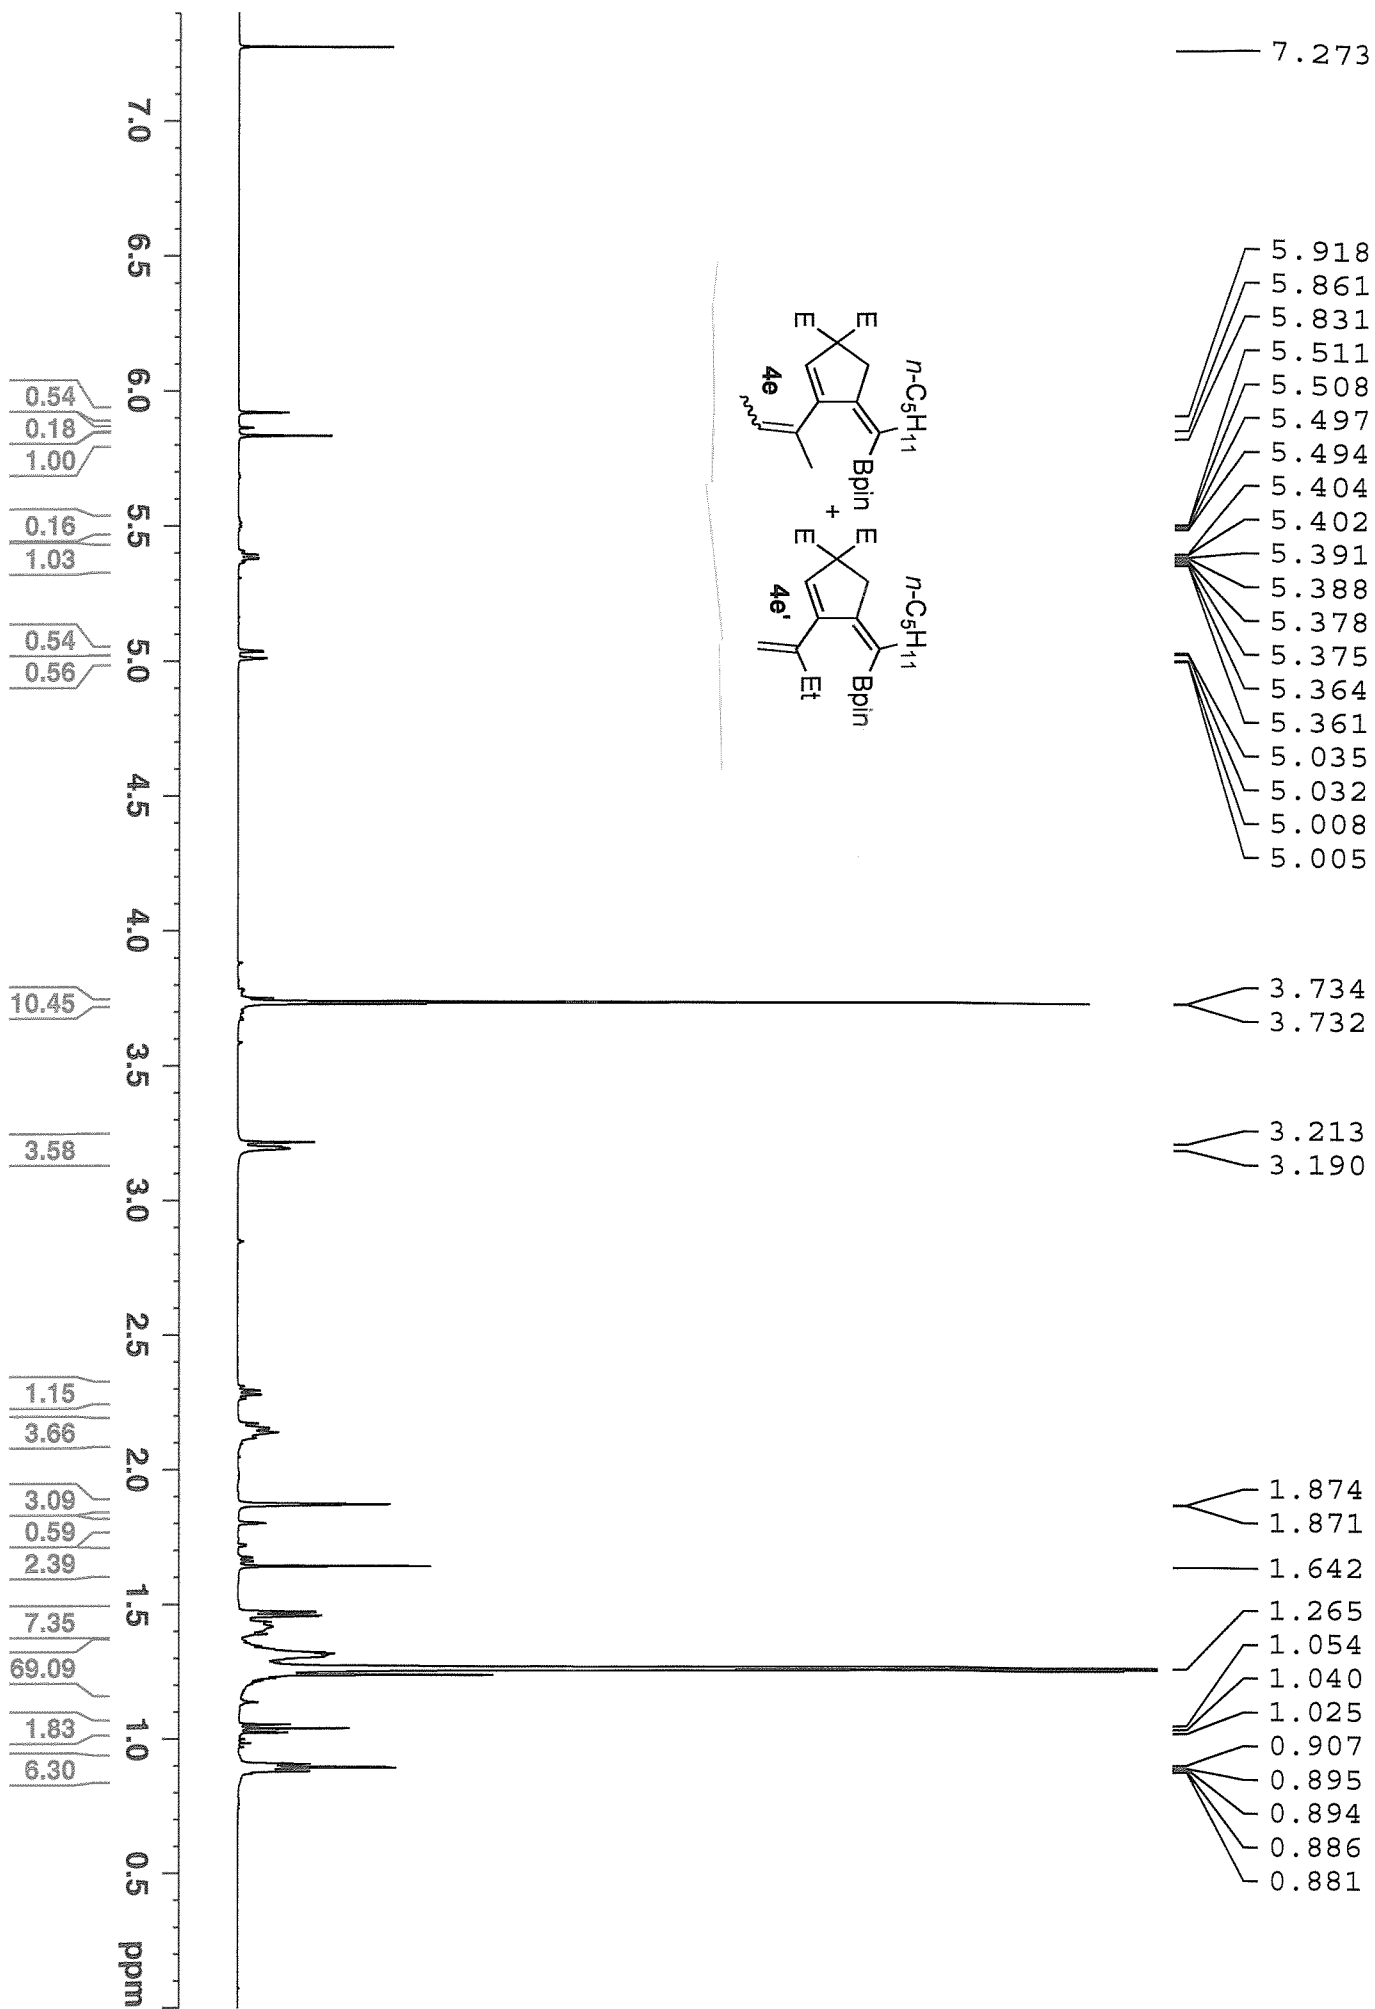

# Mass Spectrum SmartFormula Report

## Analysis Info

Analysis Name E:\Data2\Youqian\dyq-4-163-1000001.d  
Method Tune\_wide\_pos.m  
Sample Name dyq-4-163-1  
Comment

Acquisition Date 2012-11-17 14:45:16

Operator Carin Larsson  
Instrument / Ser# micrOTOF 125

## Acquisition Parameter

|             |            |                      |          |                  |           |
|-------------|------------|----------------------|----------|------------------|-----------|
| Source Type | ESI        | Ion Polarity         | Positive | Set Nebulizer    | 0.3 Bar   |
| Focus       | Not active |                      |          | Set Dry Heater   | 180 °C    |
| Scan Begin  | 50 m/z     | Set Capillary        | 4500 V   | Set Dry Gas      | 4.0 l/min |
| Scan End    | 3000 m/z   | Set End Plate Offset | -500 V   | Set Divert Valve | Source    |

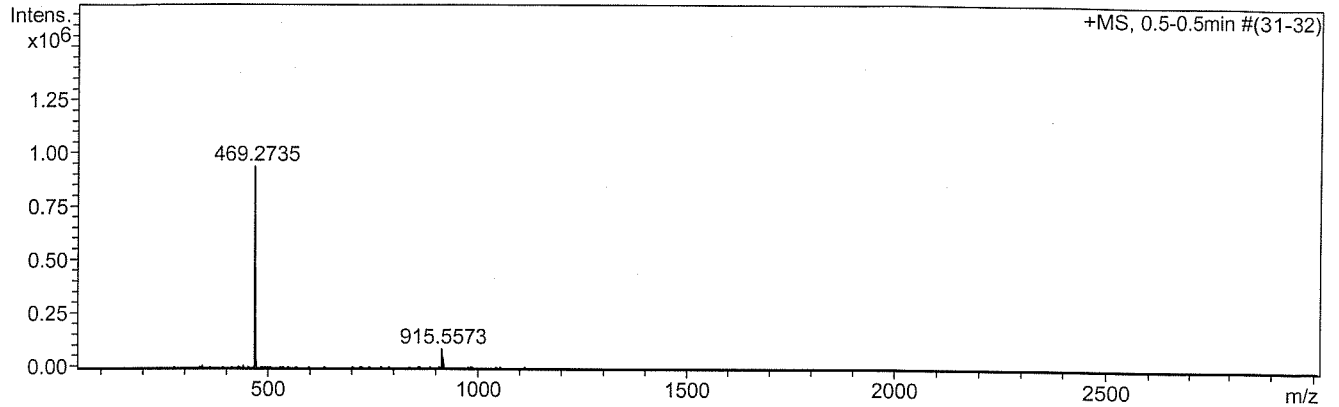

| Formula            | Meas. m/z | m/z      | err [ppm] | Mean err [ppm] |
|--------------------|-----------|----------|-----------|----------------|
| C 25 H 39 B Na O 6 | 469.2735  | 469.2736 | 0.3       | 0.4            |

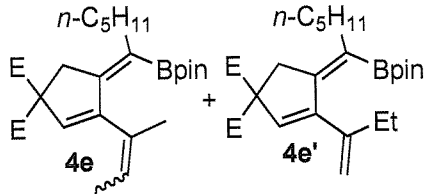

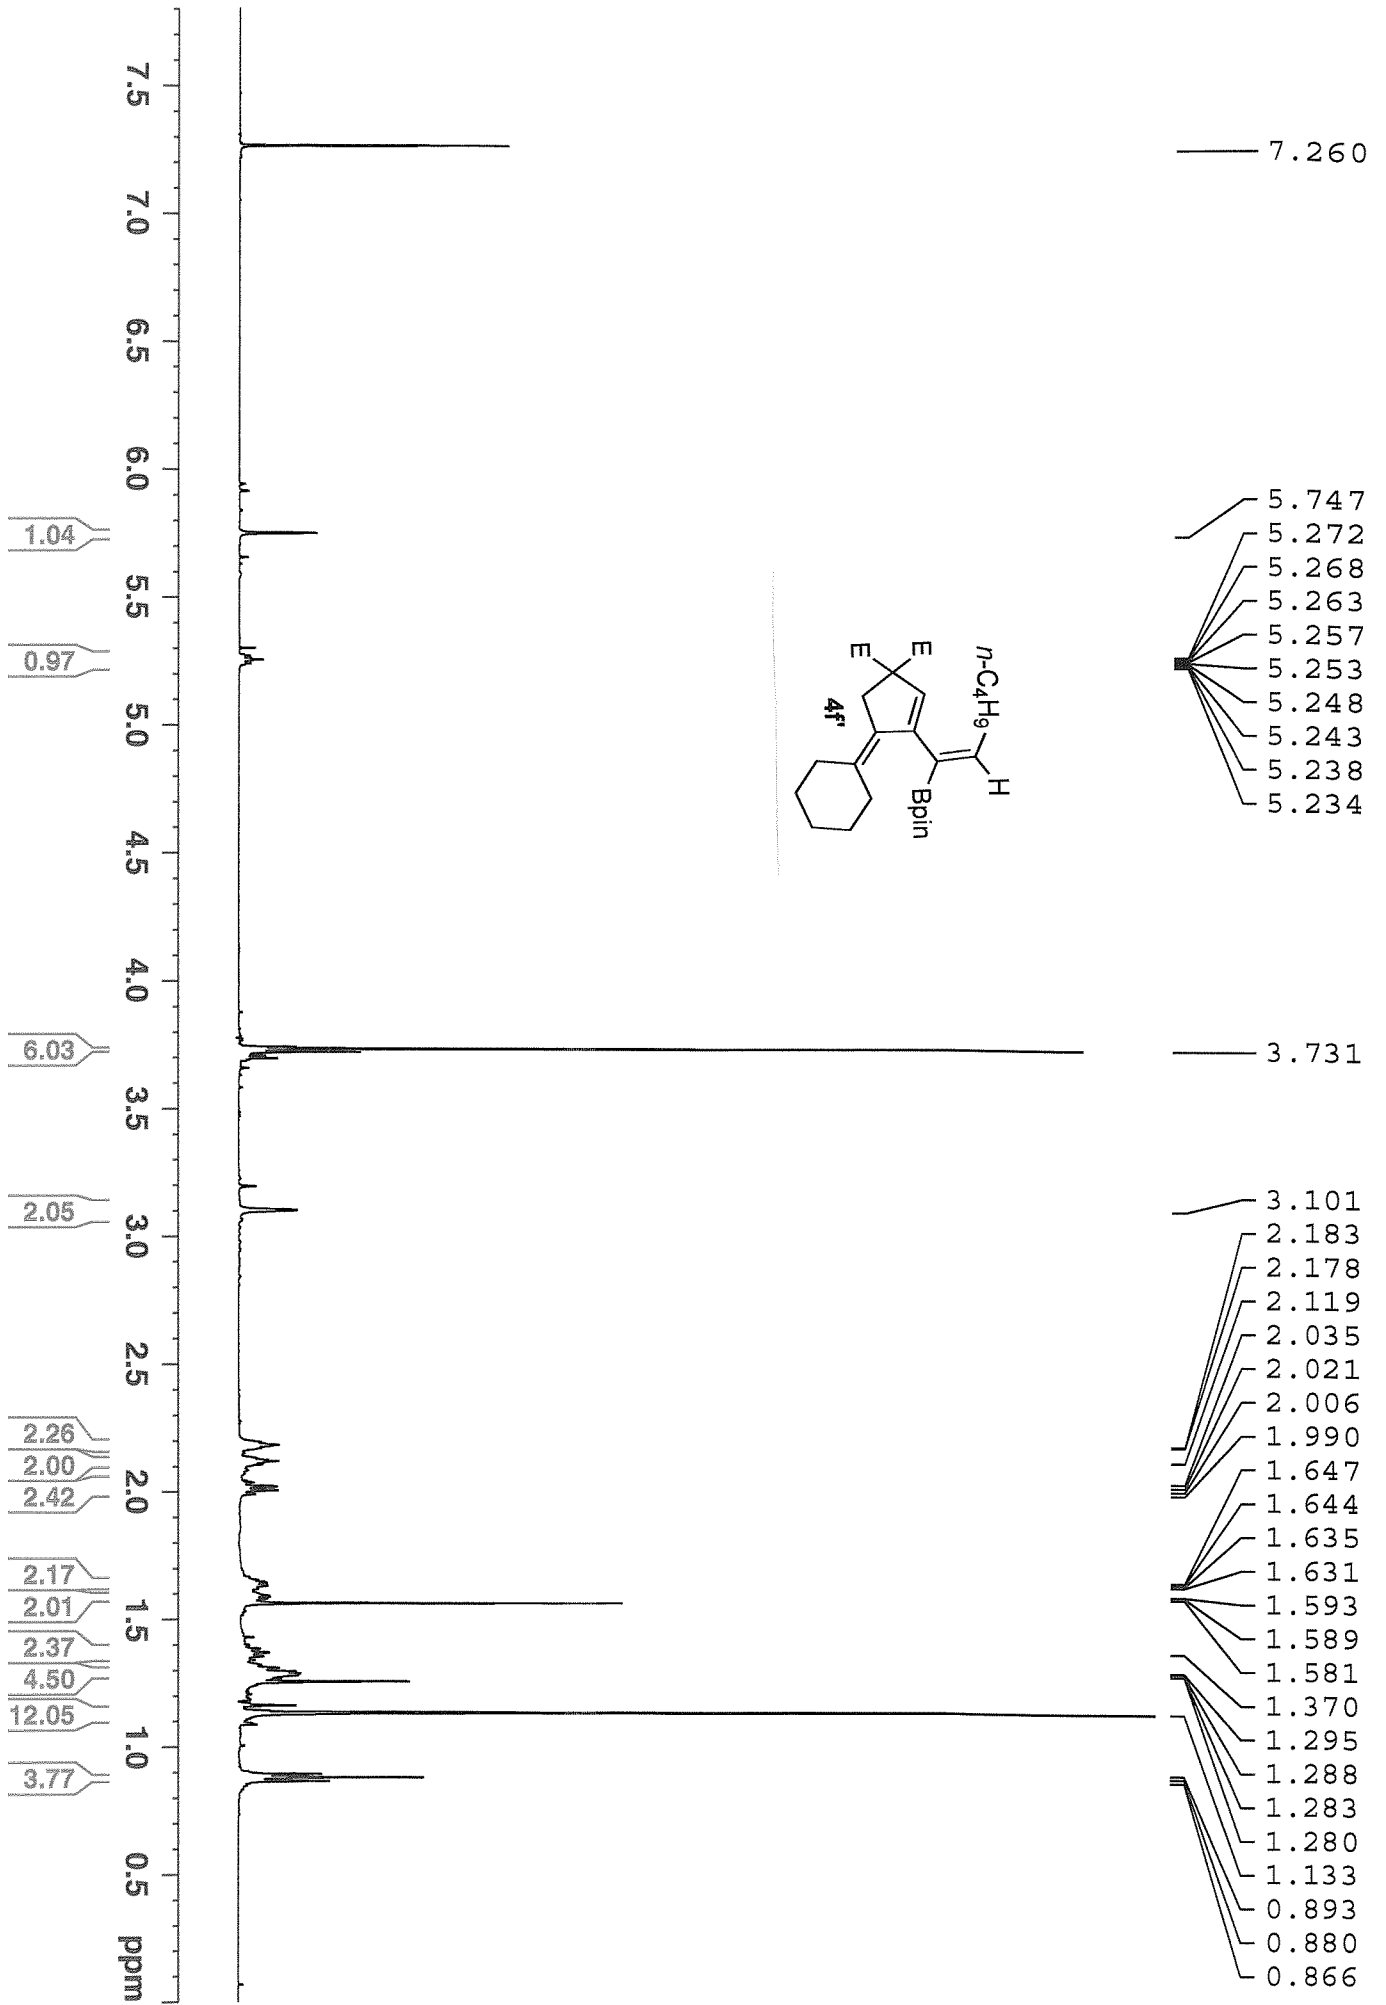



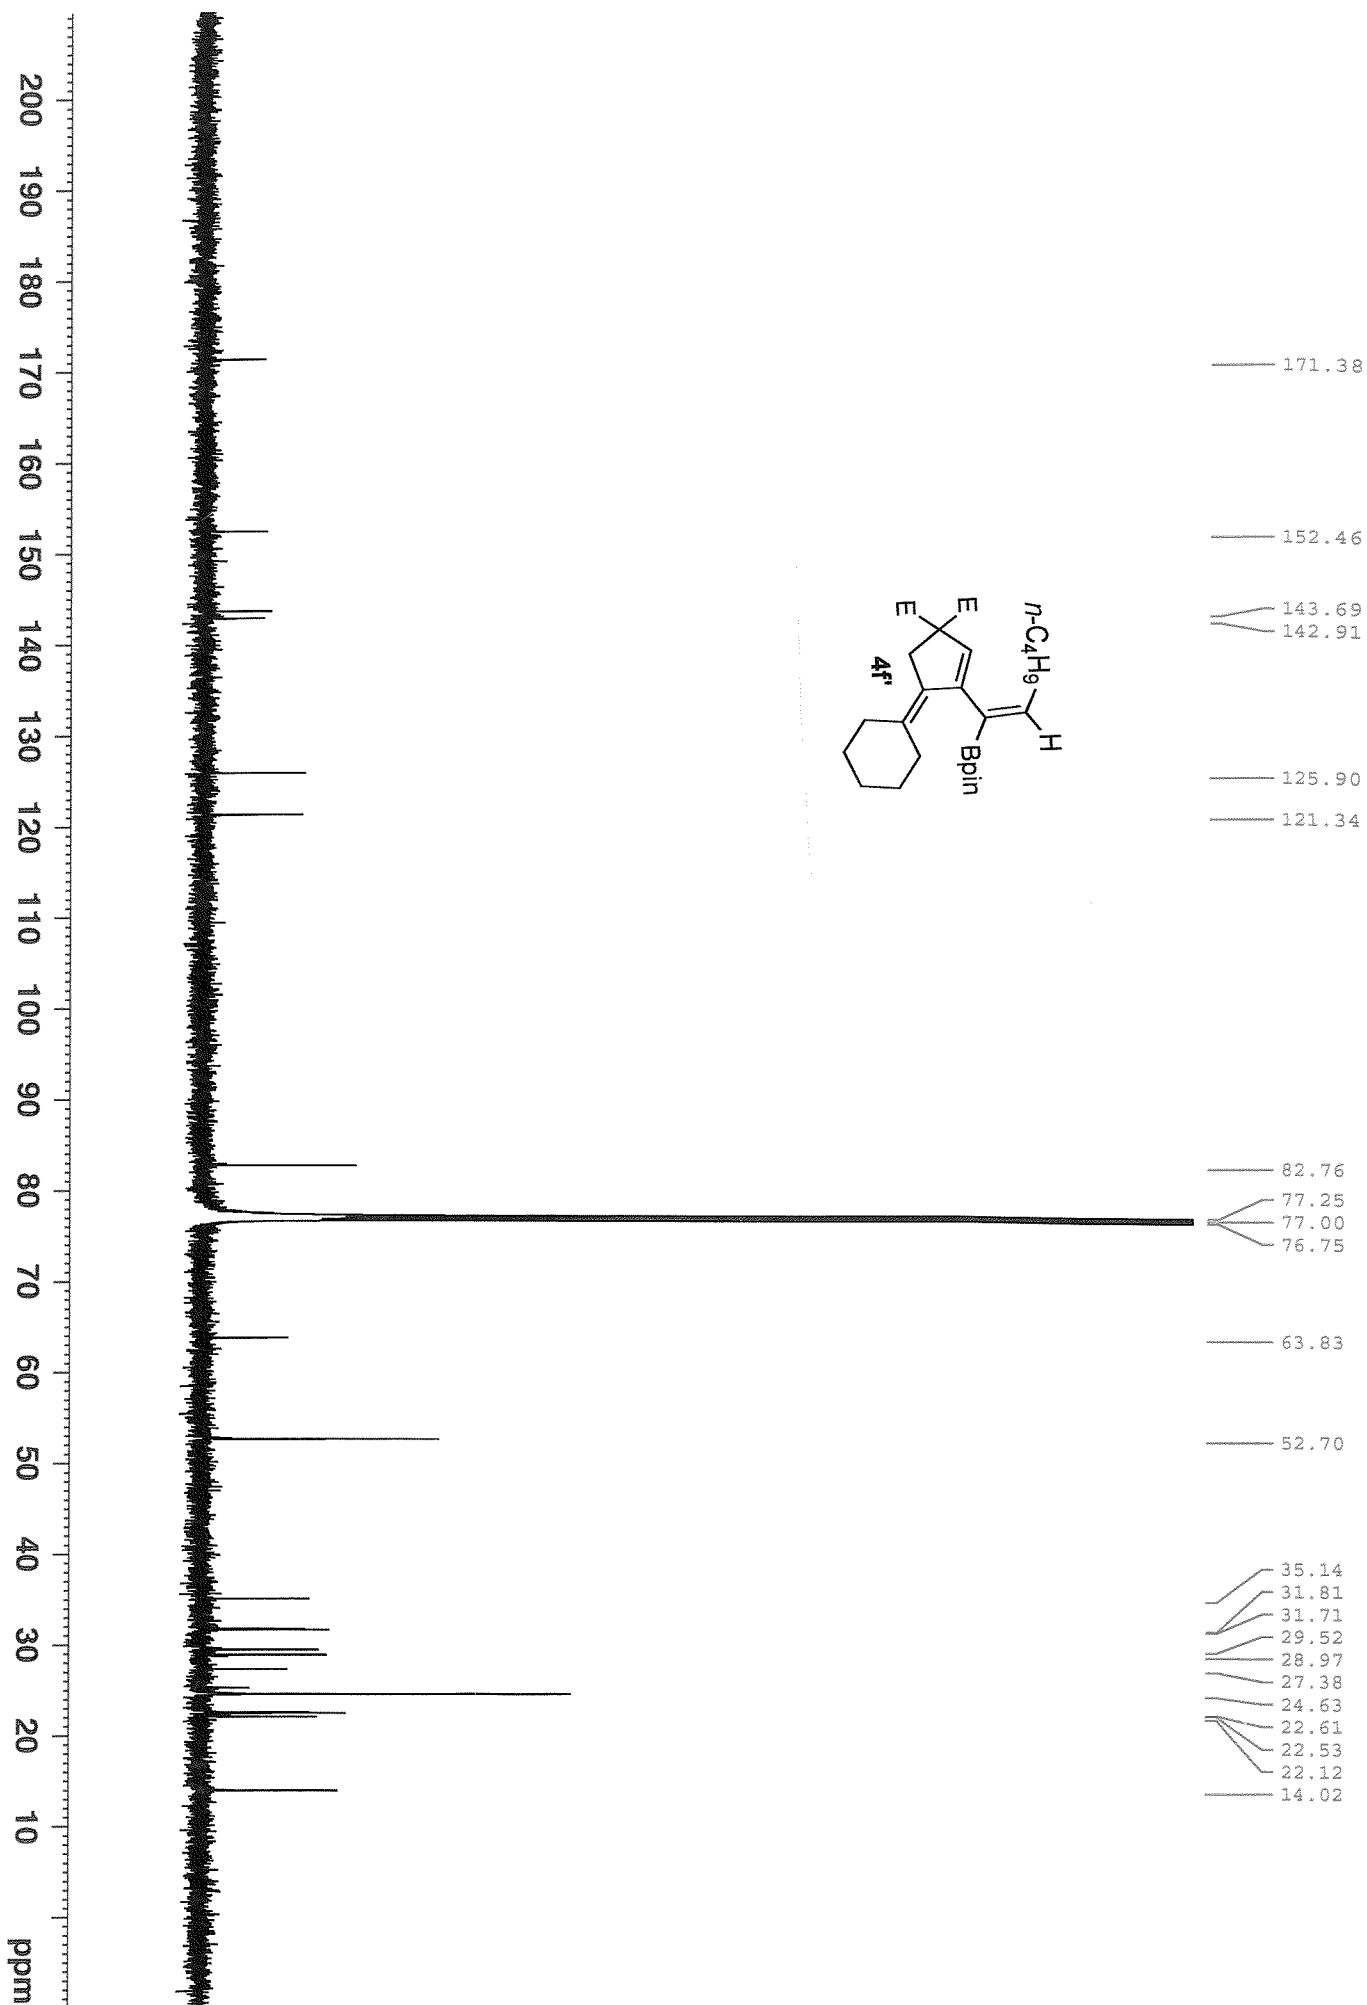

# Mass Spectrum SmartFormula Report

## Analysis Info

Analysis Name E:\Data2\Youqian\dyq-4-162-1000001.d  
Method Tune\_wide\_pos.m  
Sample Name dyq-4-162-1  
Comment

Acquisition Date 2012-11-16 14:00:49

Operator Carin Larsson  
Instrument / Ser# micrOTOF 125

## Acquisition Parameter

|             |            |                      |          |                  |           |
|-------------|------------|----------------------|----------|------------------|-----------|
| Source Type | ESI        | Ion Polarity         | Positive | Set Nebulizer    | 0.3 Bar   |
| Focus       | Not active |                      |          | Set Dry Heater   | 180 °C    |
| Scan Begin  | 50 m/z     | Set Capillary        | 4500 V   | Set Dry Gas      | 4.0 l/min |
| Scan End    | 3000 m/z   | Set End Plate Offset | -500 V   | Set Divert Valve | Source    |

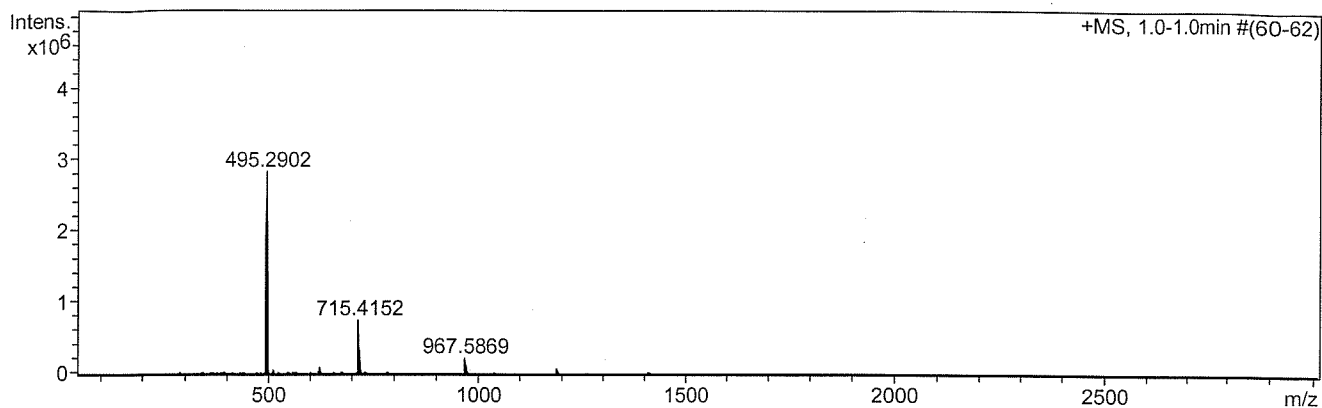

| Formula            | Meas. m/z | m/z      | err [ppm] | Mean err [ppm] |
|--------------------|-----------|----------|-----------|----------------|
| C 27 H 41 B Na O 6 | 495.2902  | 495.2893 | -1.9      | -2.1           |

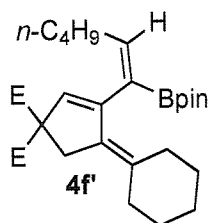

dyg-4-162-Inoe 16 1 C:\Bruker\TOPK

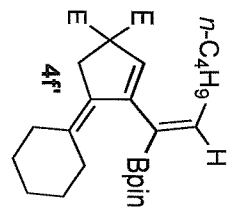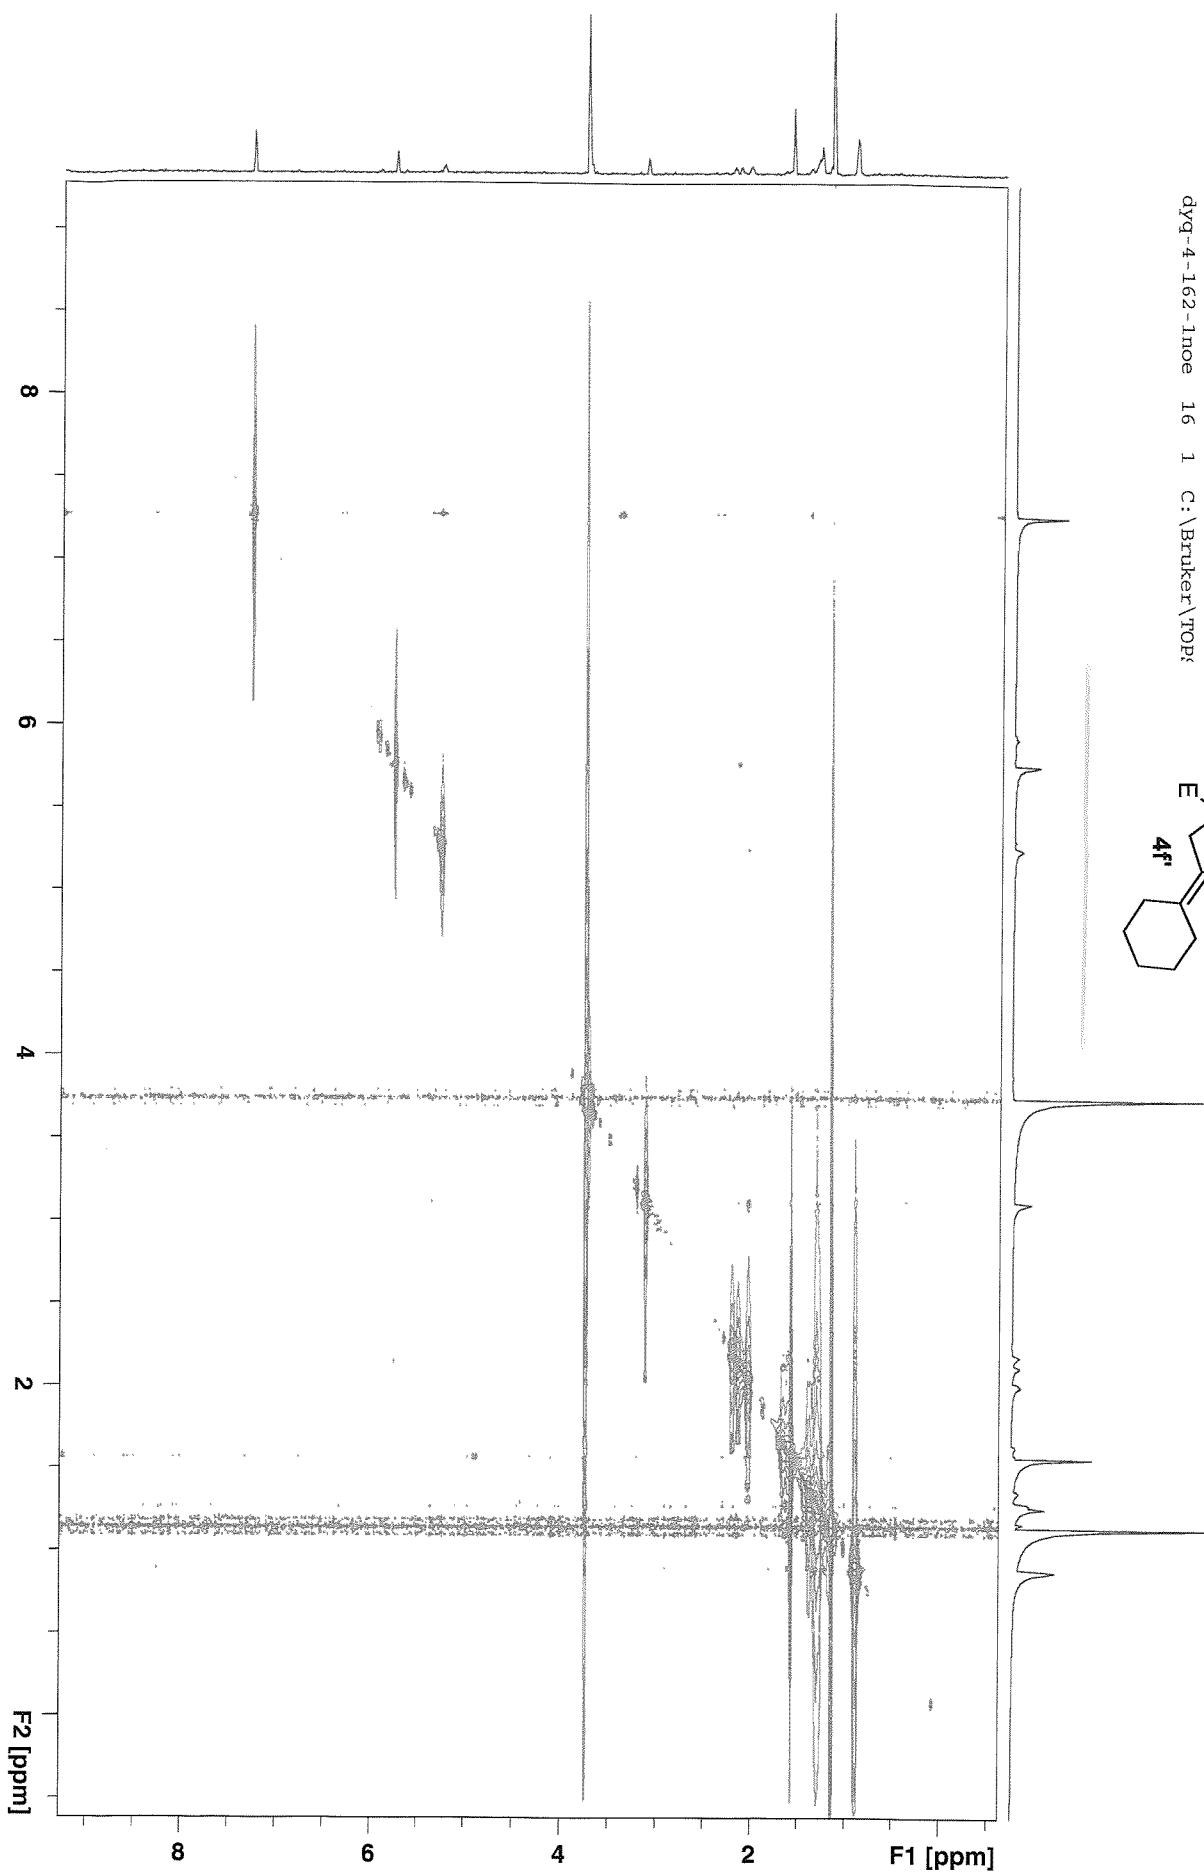

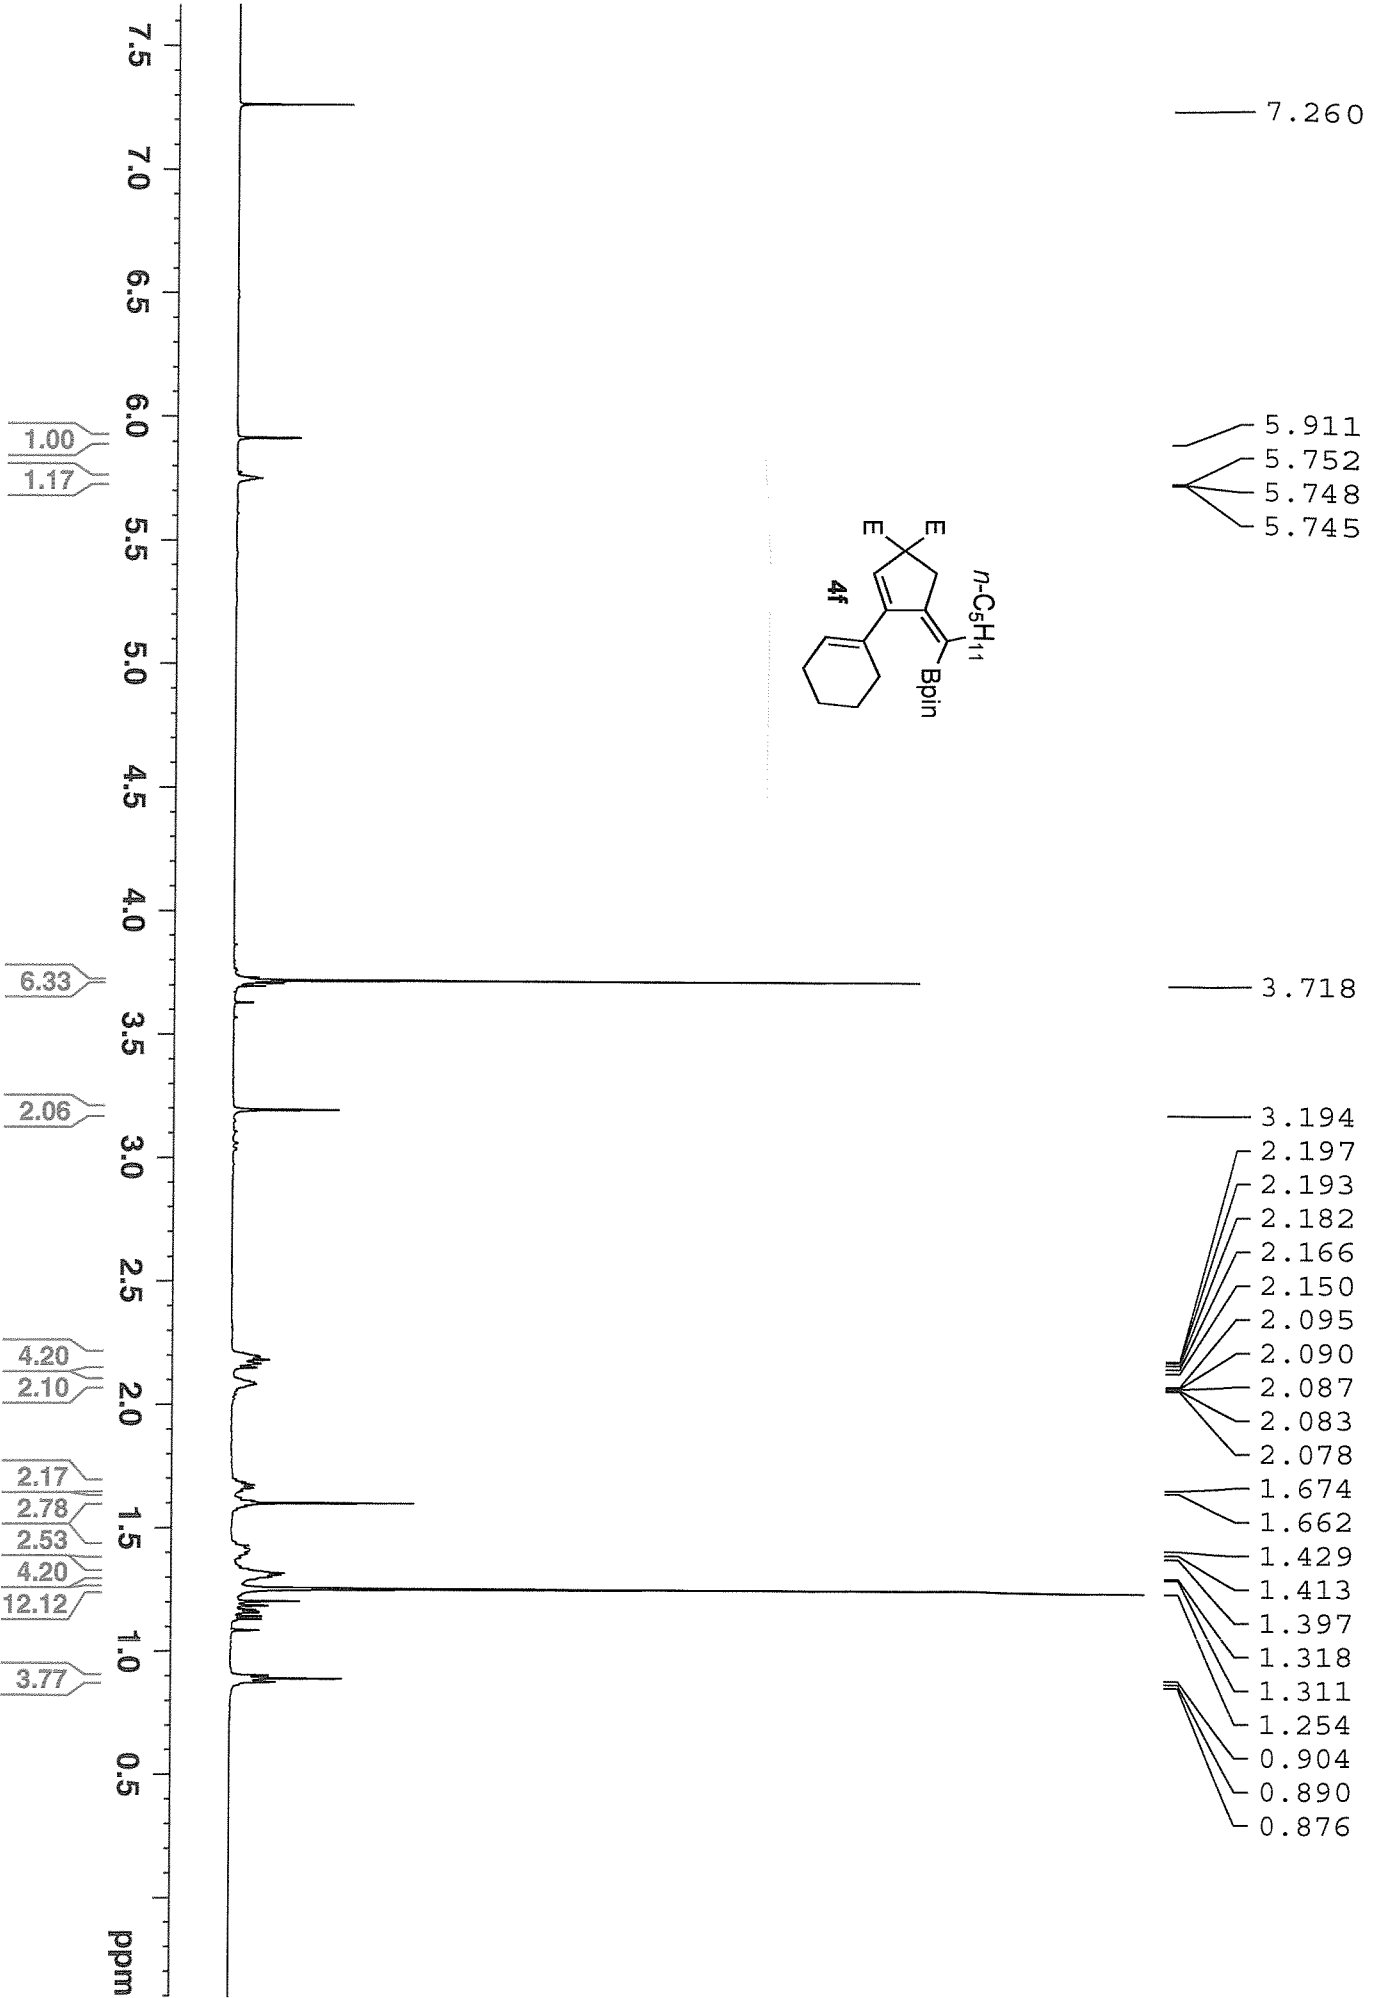

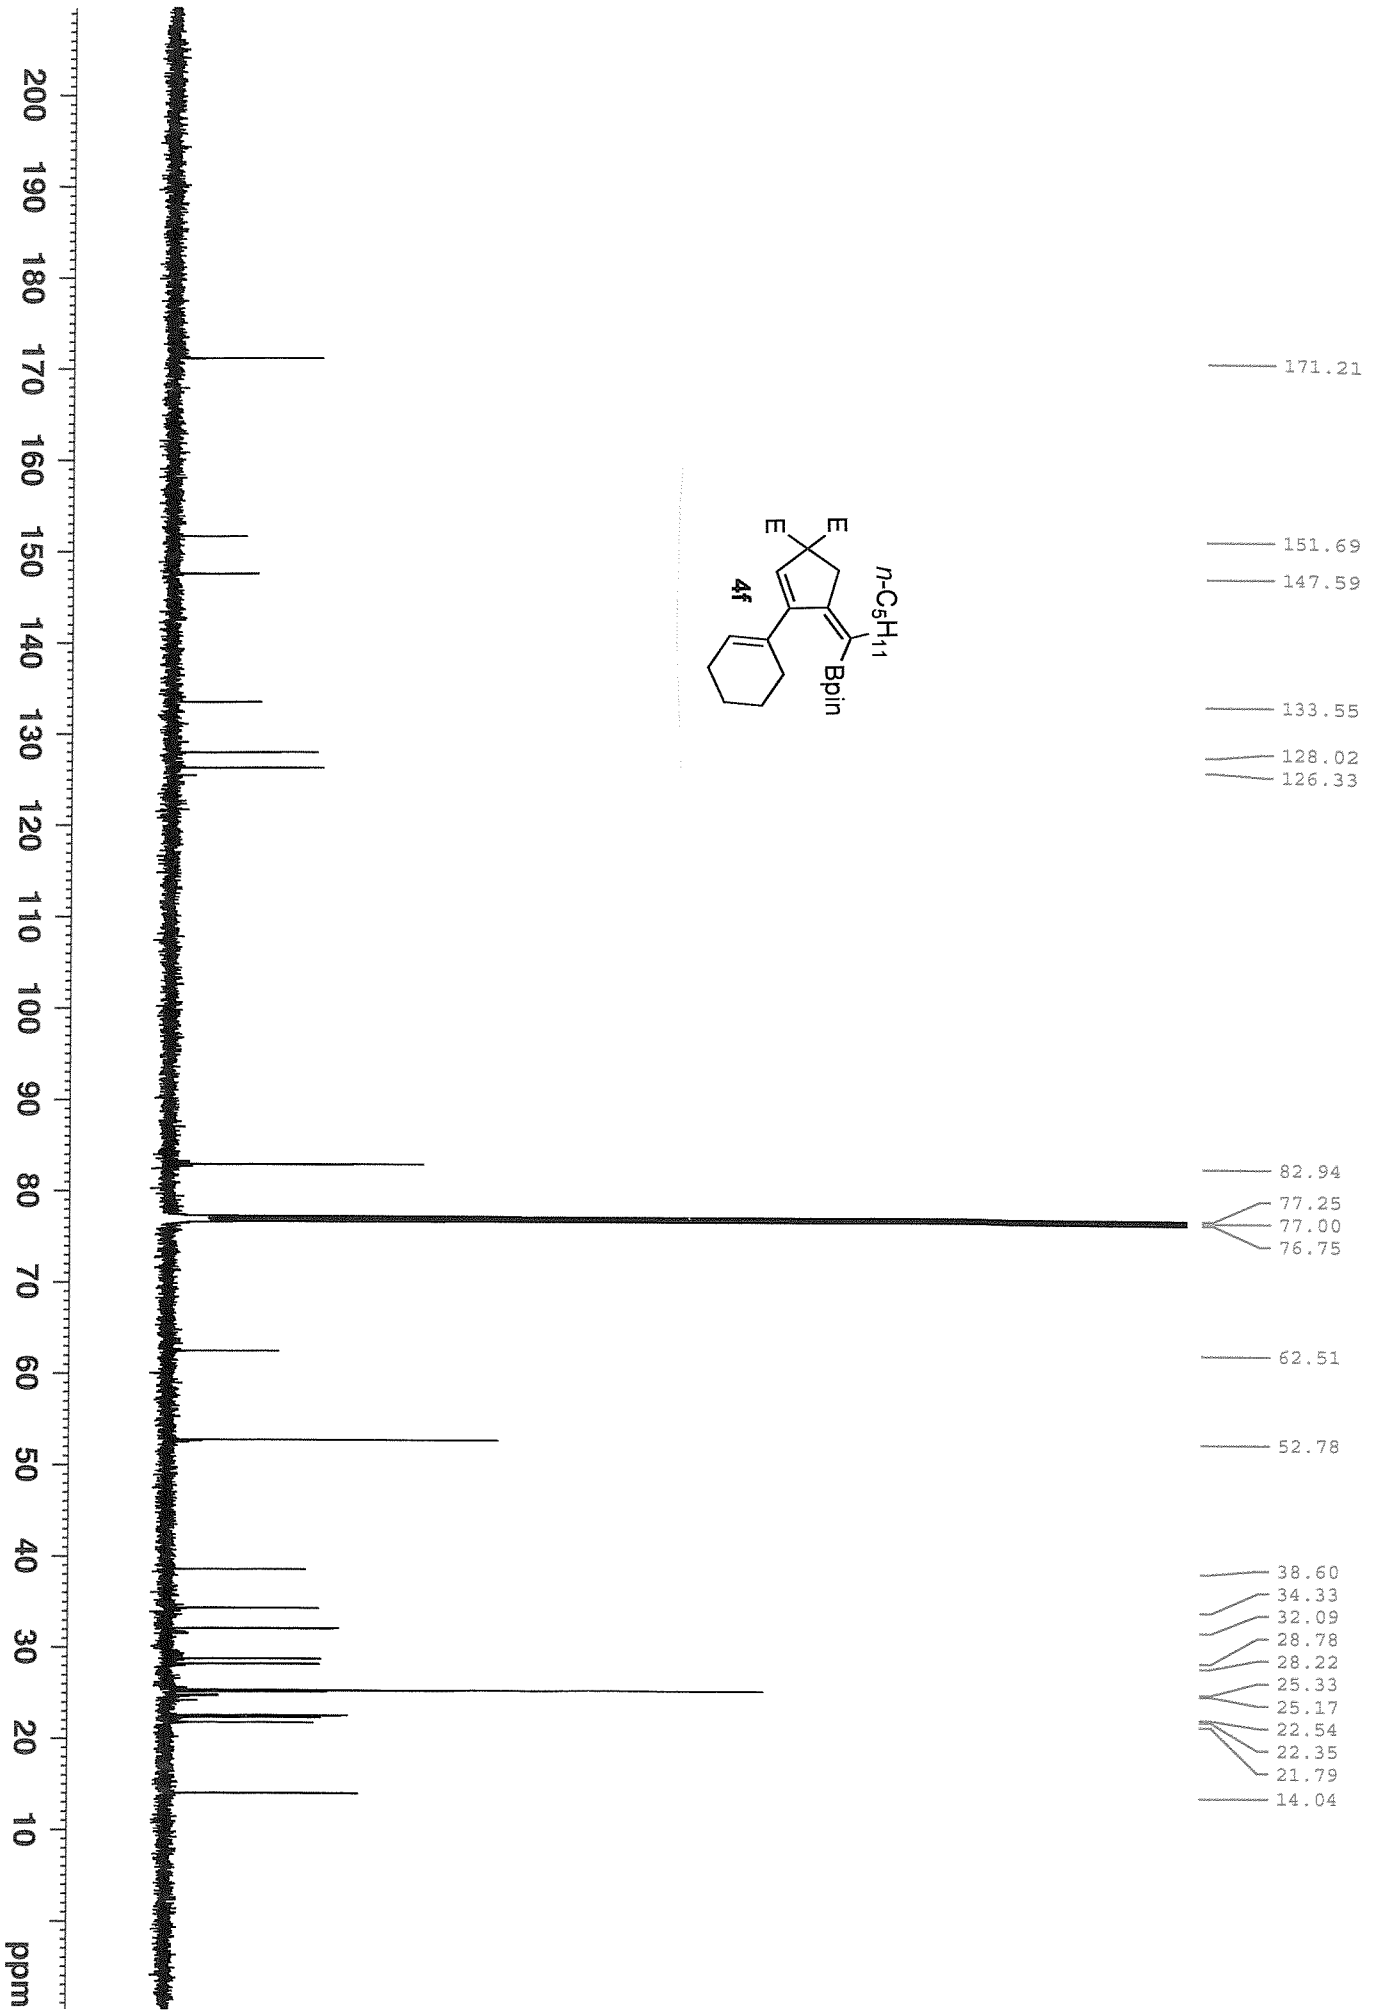

# Mass Spectrum SmartFormula Report

## Analysis Info

Analysis Name E:\Data2\Youqian\dyq-4-162-2000001.d  
Method Tune\_wide\_pos.m  
Sample Name dyq-4-162-2  
Comment

Acquisition Date 2012-11-16 14:06:58

Operator Carin Larsson  
Instrument / Ser# micrOTOF 125

## Acquisition Parameter

|             |            |                      |          |                  |           |
|-------------|------------|----------------------|----------|------------------|-----------|
| Source Type | ESI        | Ion Polarity         | Positive | Set Nebulizer    | 0.3 Bar   |
| Focus       | Not active |                      |          | Set Dry Heater   | 180 °C    |
| Scan Begin  | 50 m/z     | Set Capillary        | 4500 V   | Set Dry Gas      | 4.0 l/min |
| Scan End    | 3000 m/z   | Set End Plate Offset | -500 V   | Set Divert Valve | Source    |

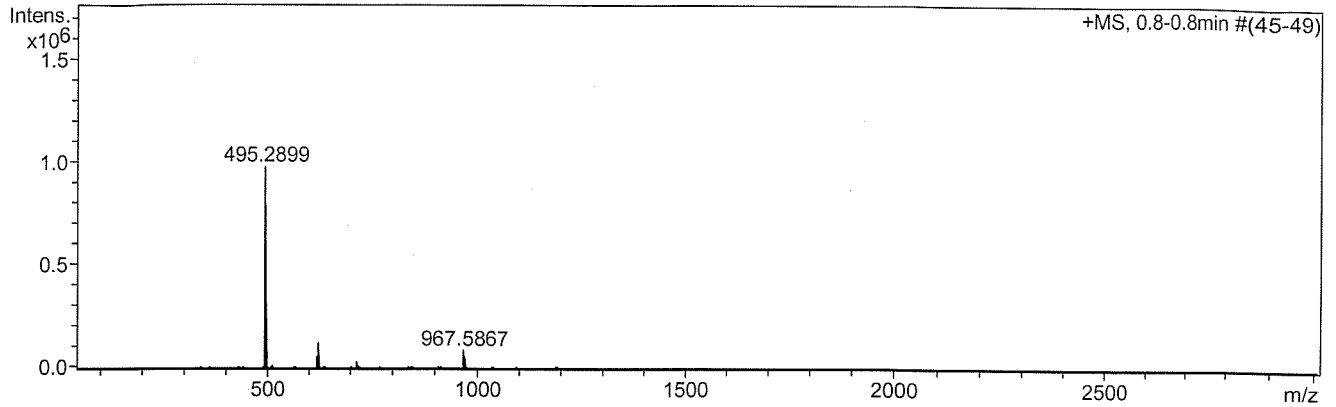

| Formula            | Meas. m/z | m/z      | err [ppm] | Mean err [ppm] |
|--------------------|-----------|----------|-----------|----------------|
| C 27 H 41 B Na O 6 | 495.2899  | 495.2893 | -1.2      | -3.0           |

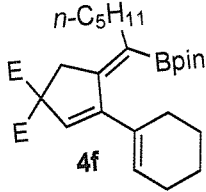

dyg-4-162-2noe 16 1 C:\Bruker\TOPSPIN

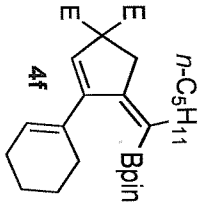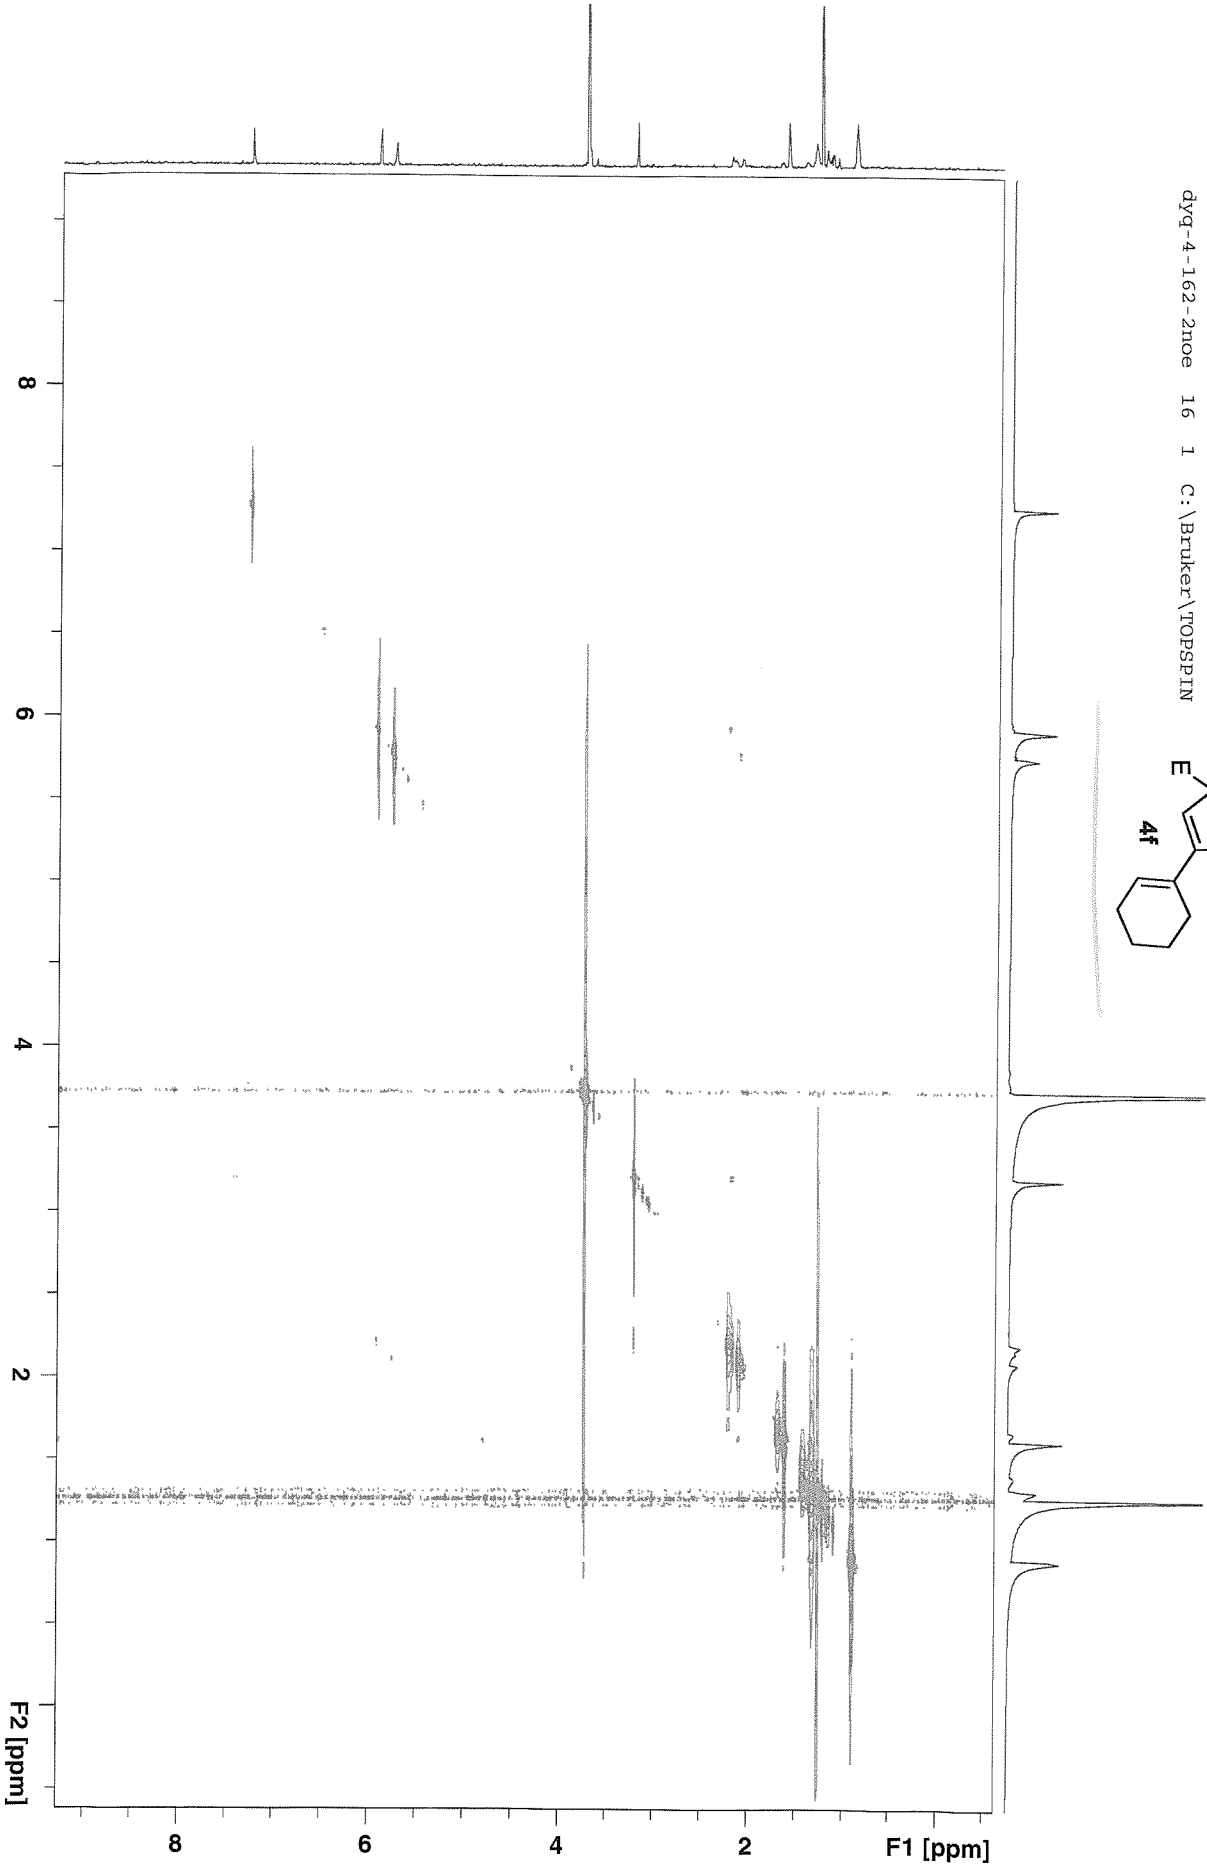

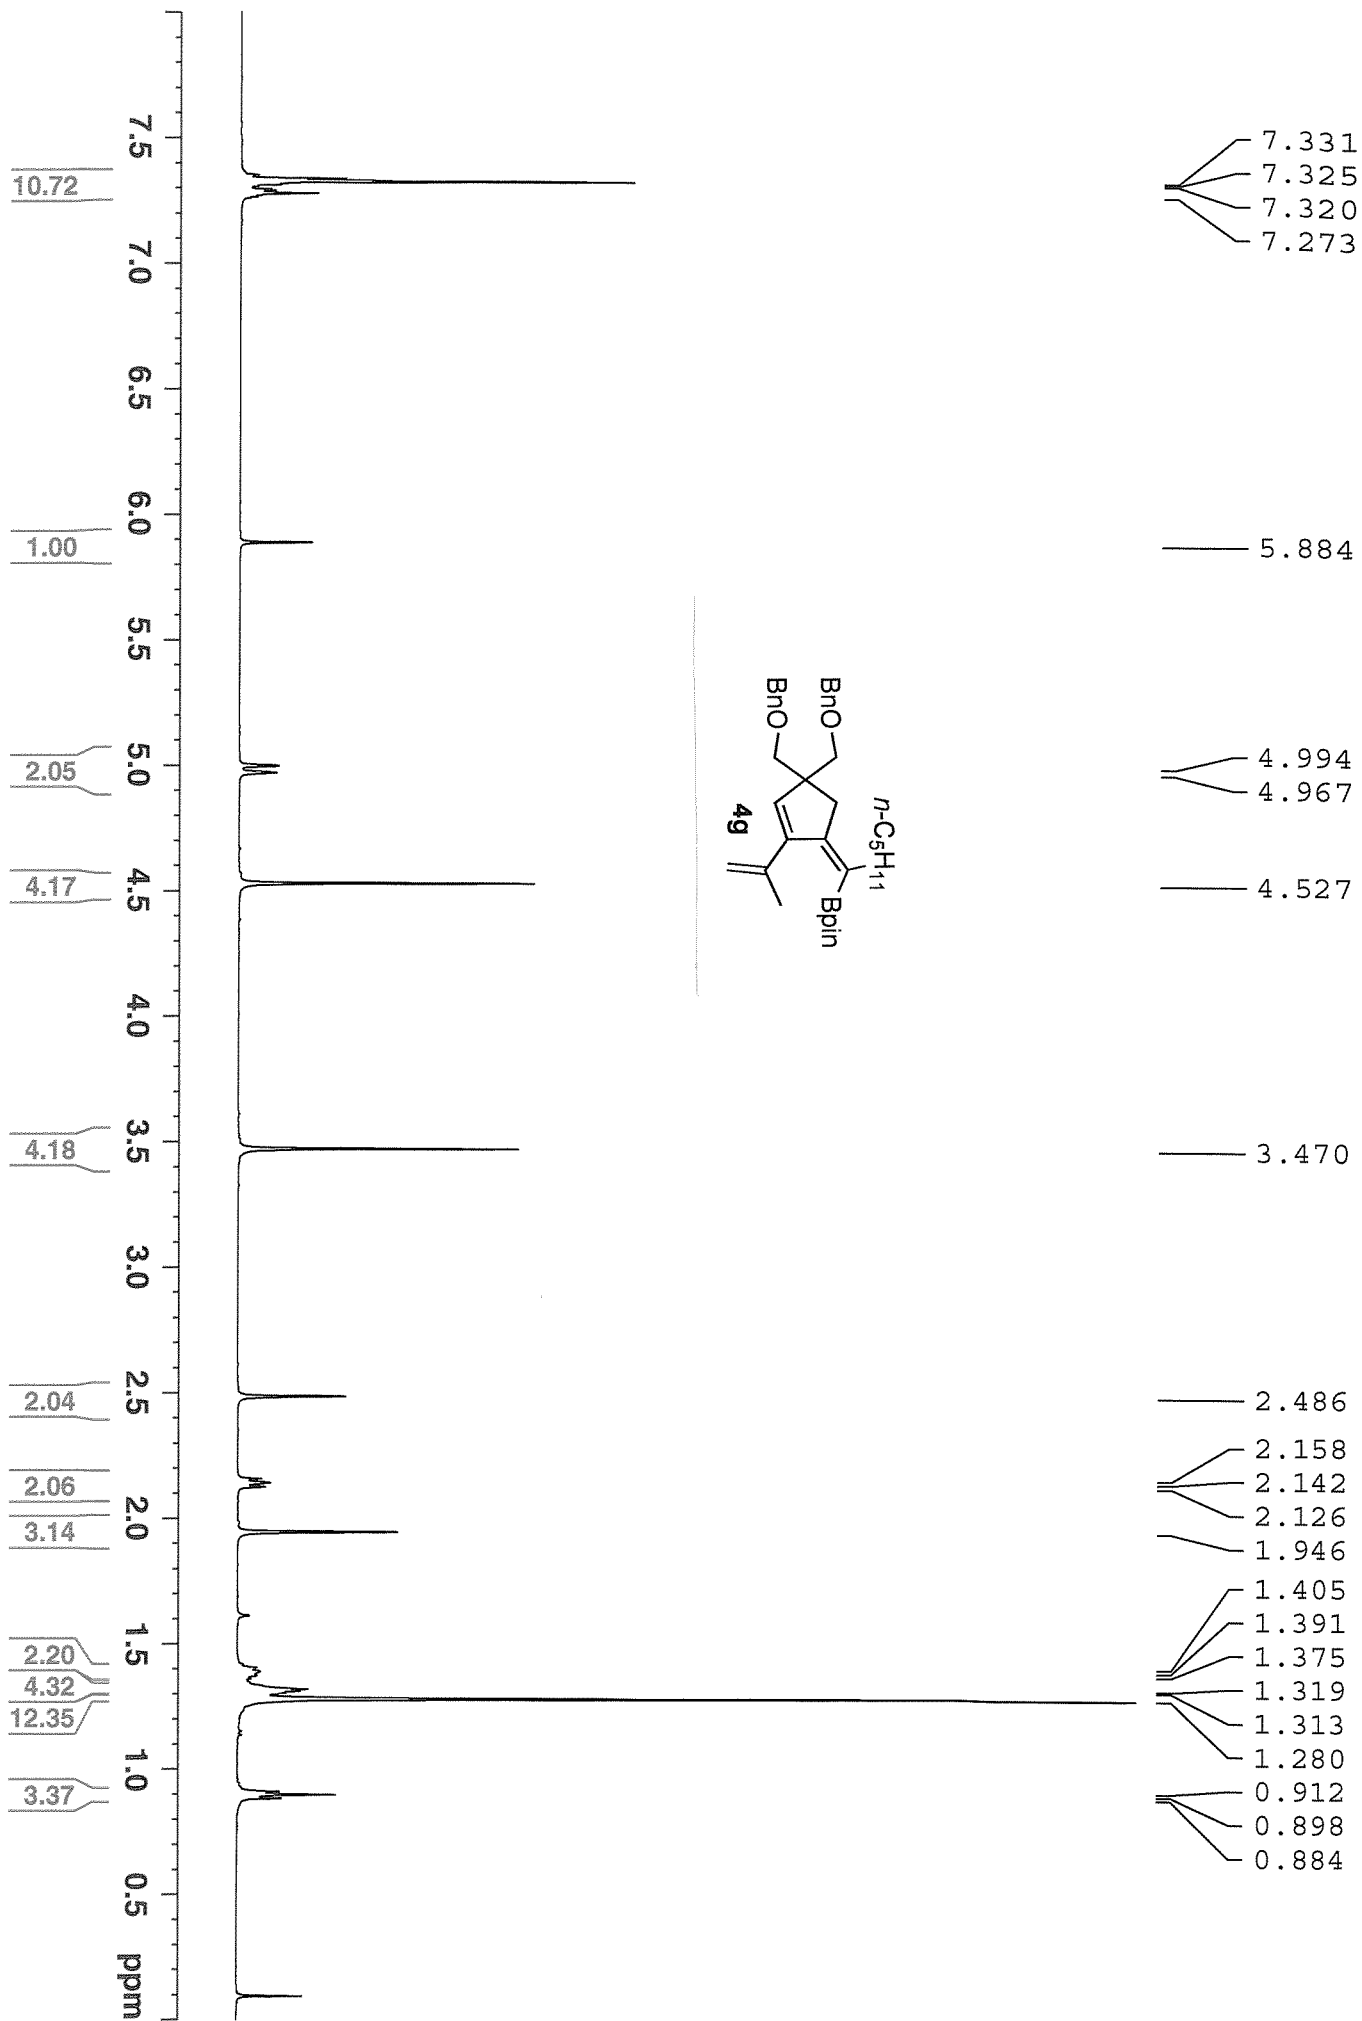



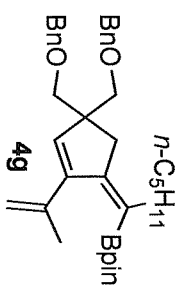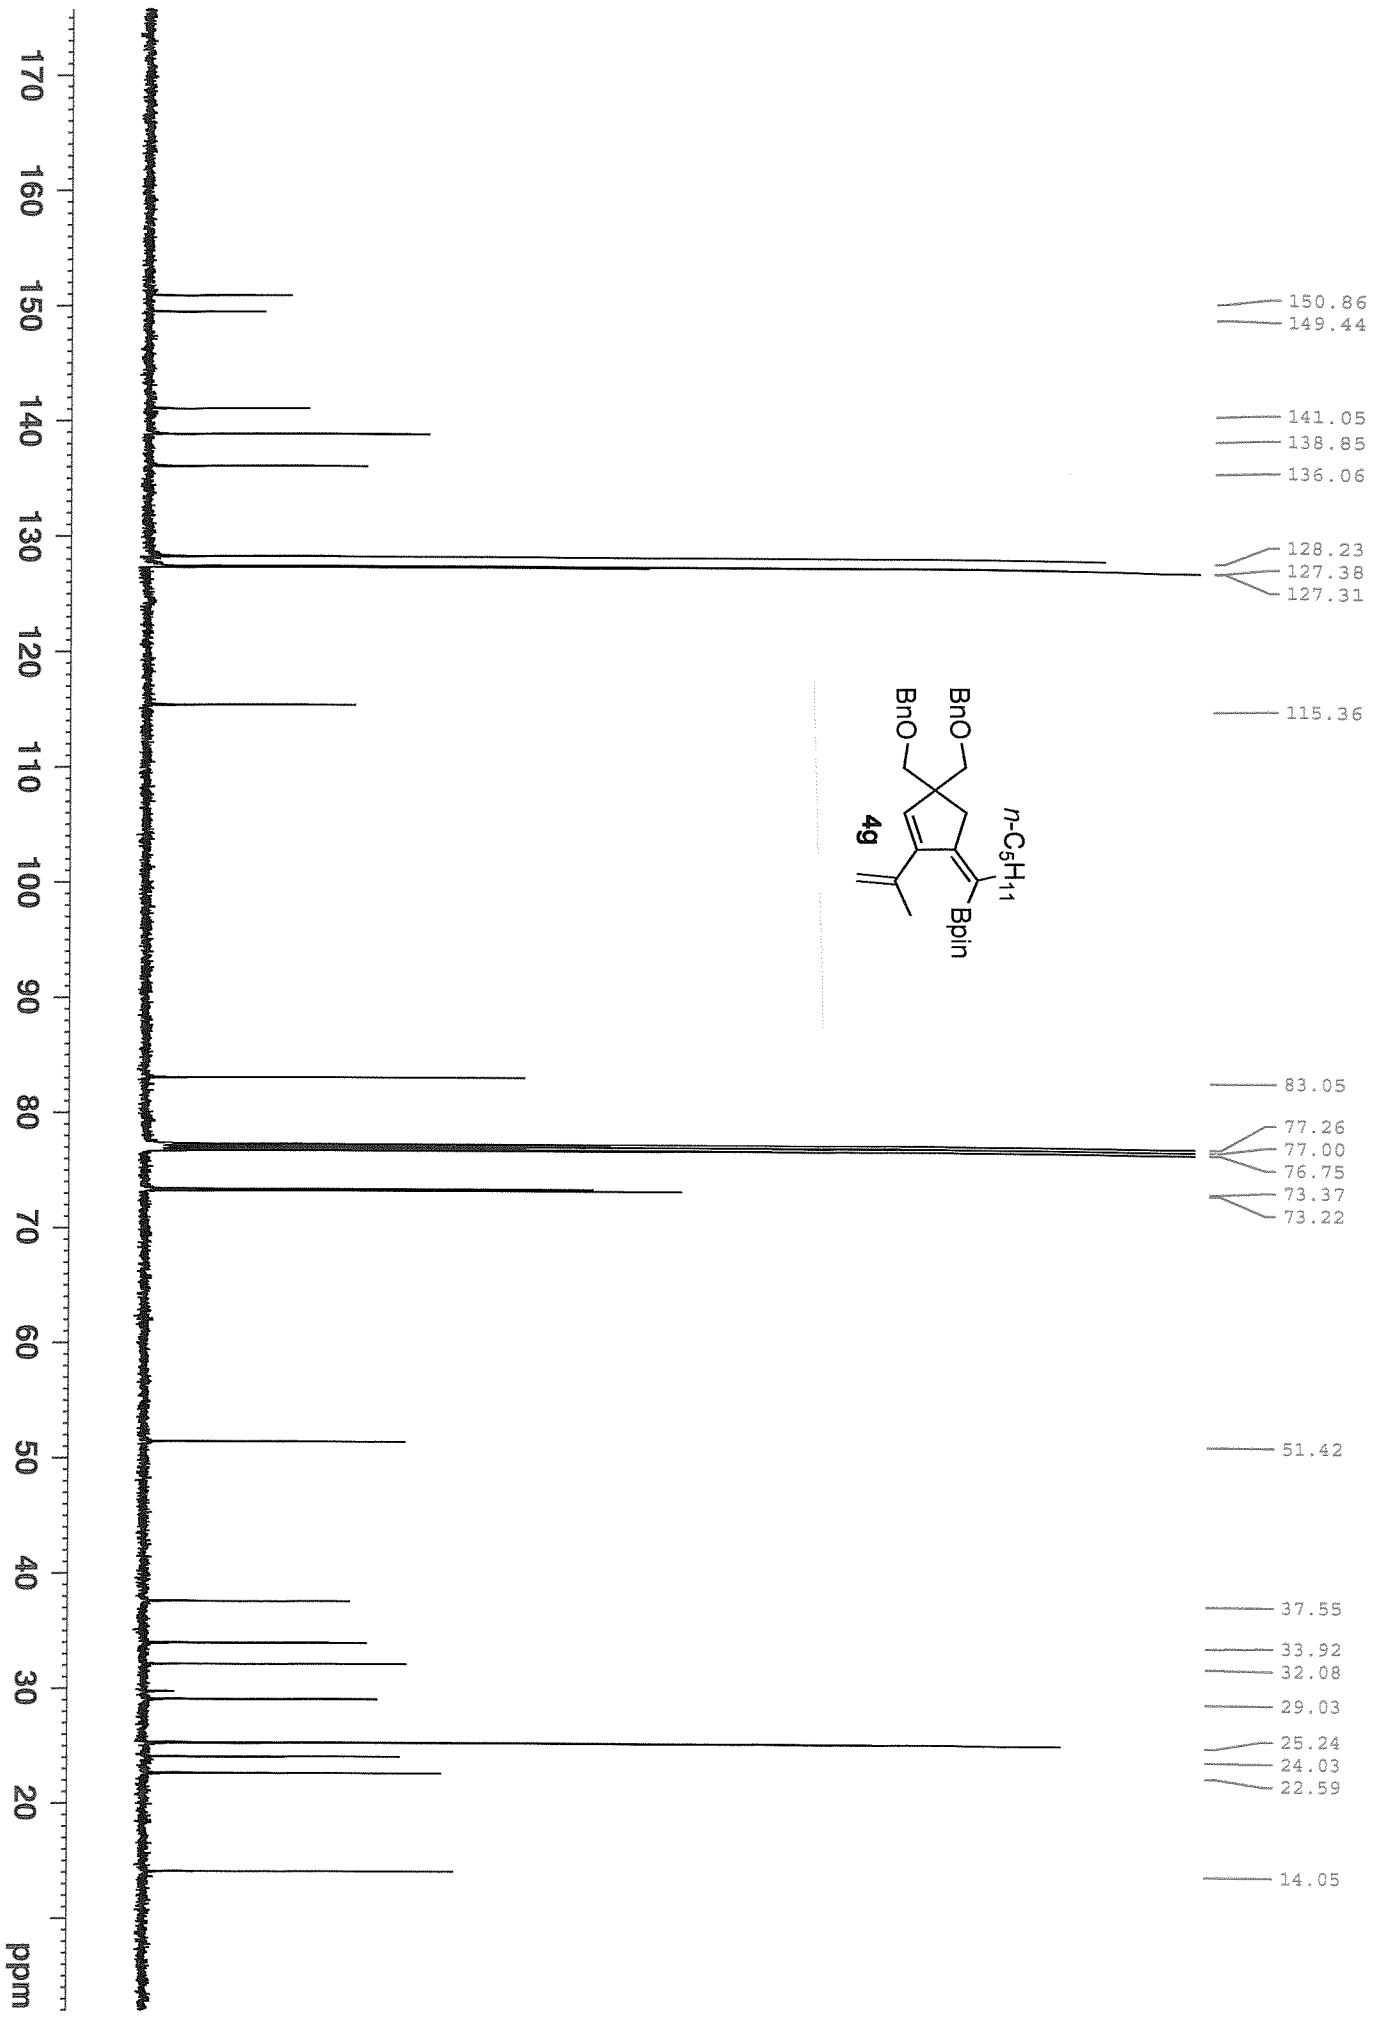

# Mass Spectrum SmartFormula Report

## Analysis Info

Analysis Name E:\Data2\Youqian\Teb-c-59000001.d  
Method Tune\_low\_pos.m  
Sample Name Teb-c-59  
Comment

Acquisition Date 2012-12-13 15:42:26

Operator Carin Larsson  
Instrument / Ser# micrOTOF 125

## Acquisition Parameter

|             |            |                      |          |                  |           |
|-------------|------------|----------------------|----------|------------------|-----------|
| Source Type | ESI        | Ion Polarity         | Positive | Set Nebulizer    | 0.4 Bar   |
| Focus       | Not active |                      |          | Set Dry Heater   | 180 °C    |
| Scan Begin  | 50 m/z     | Set Capillary        | 4000 V   | Set Dry Gas      | 4.0 l/min |
| Scan End    | 1000 m/z   | Set End Plate Offset | -500 V   | Set Divert Valve | Source    |

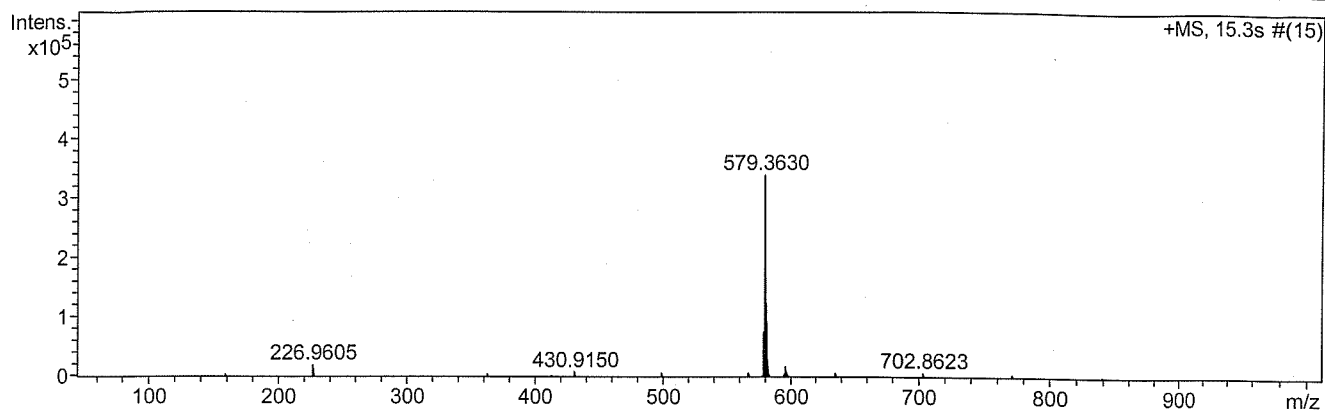

| Formula            | Meas. m/z | m/z      | err [ppm] | Mean err [ppm] |
|--------------------|-----------|----------|-----------|----------------|
| C 36 H 49 B Na O 4 | 579.3630  | 579.3622 | -1.4      | -1.0           |

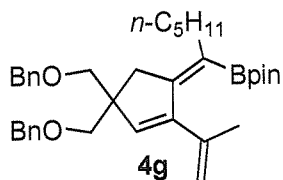

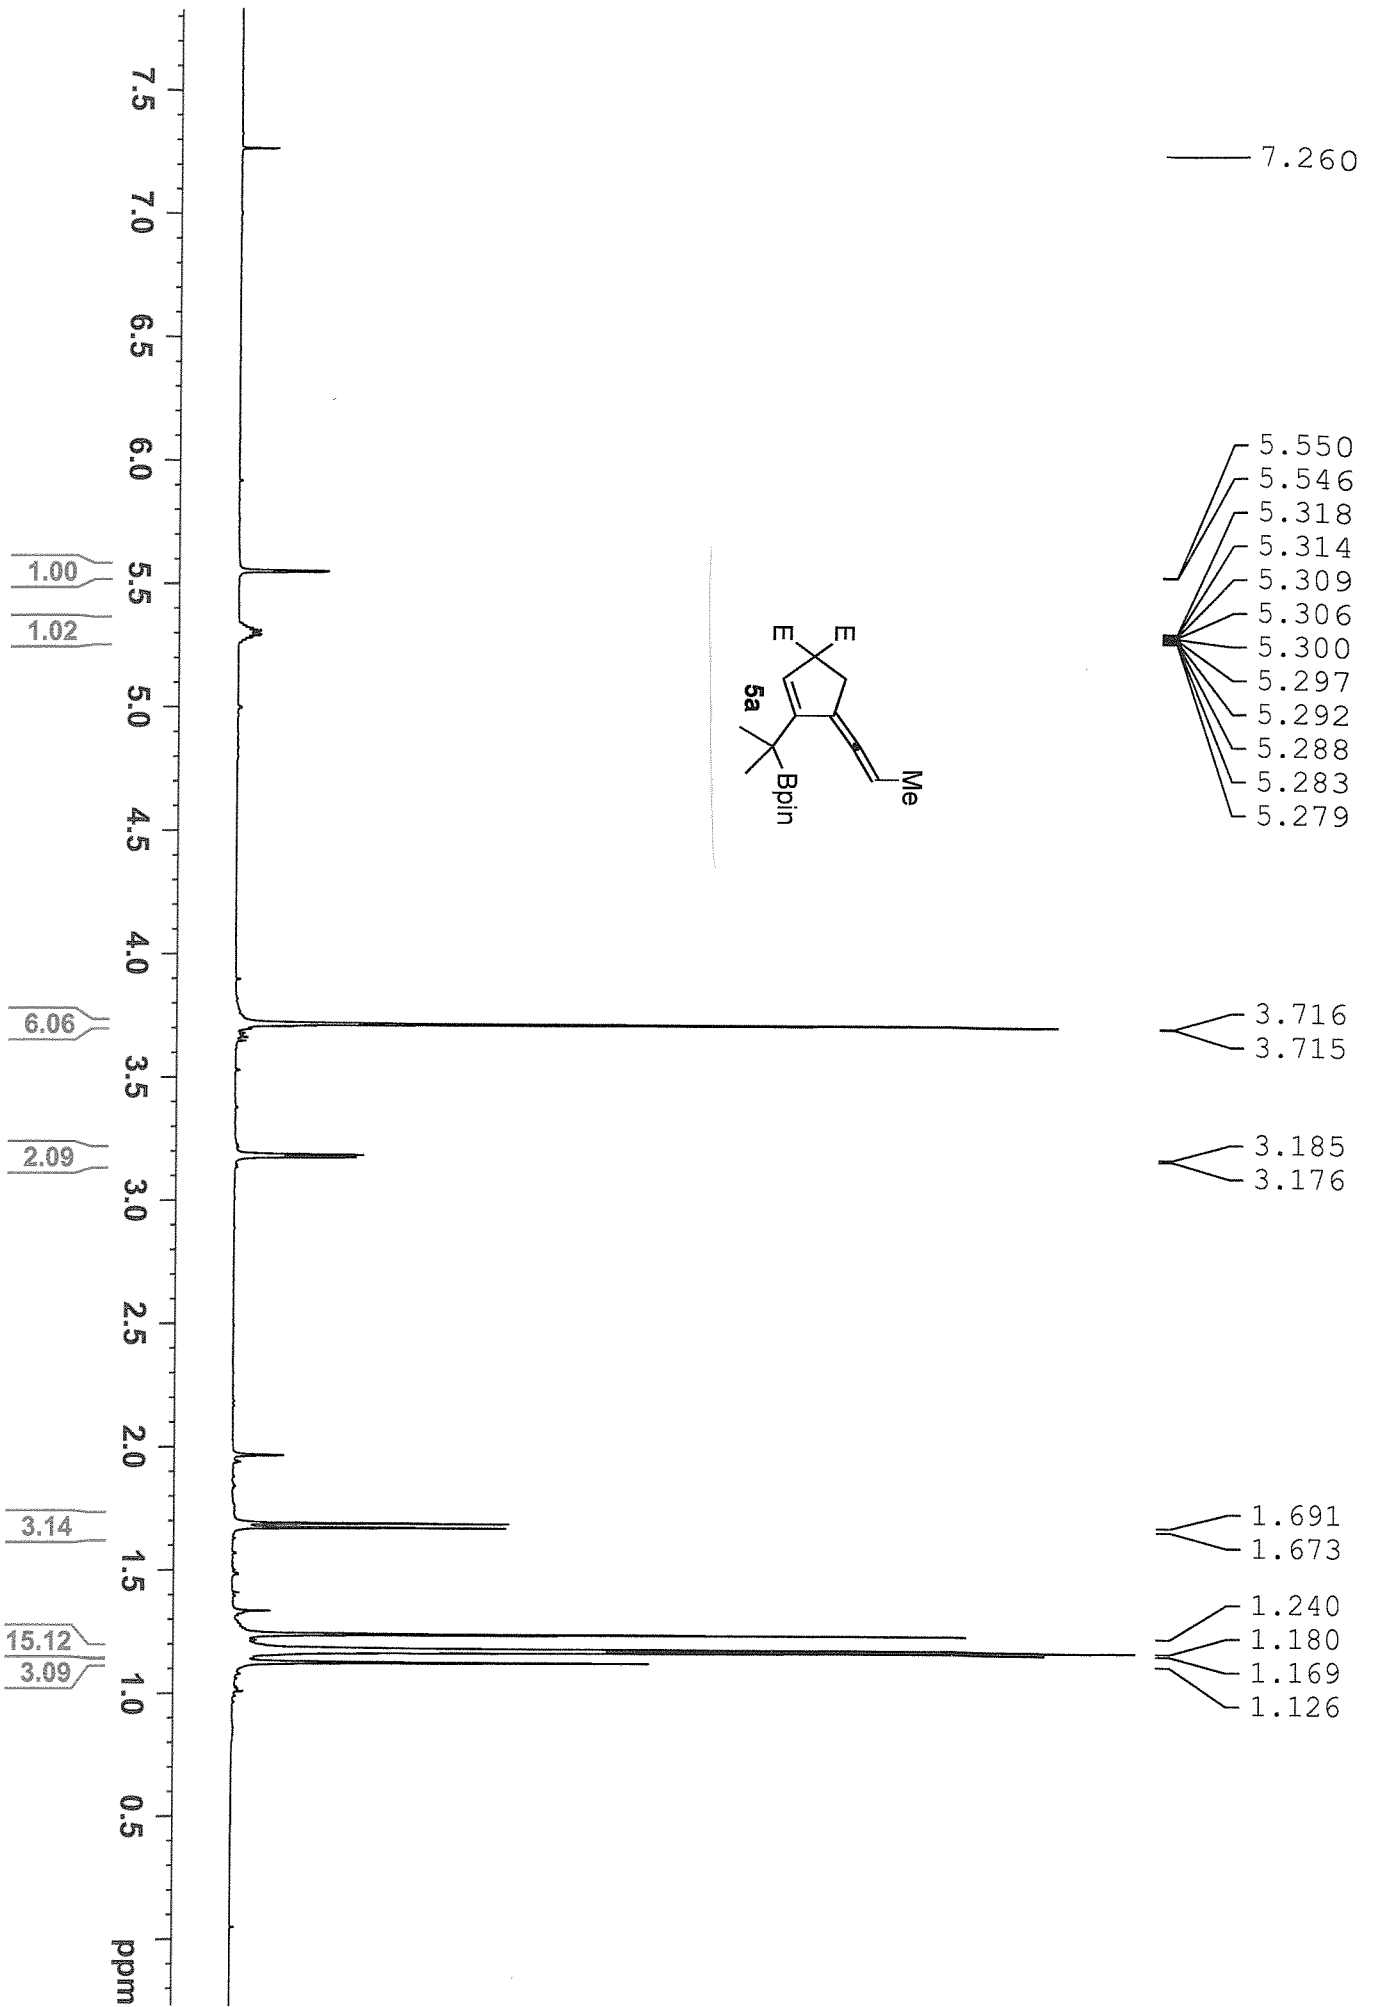

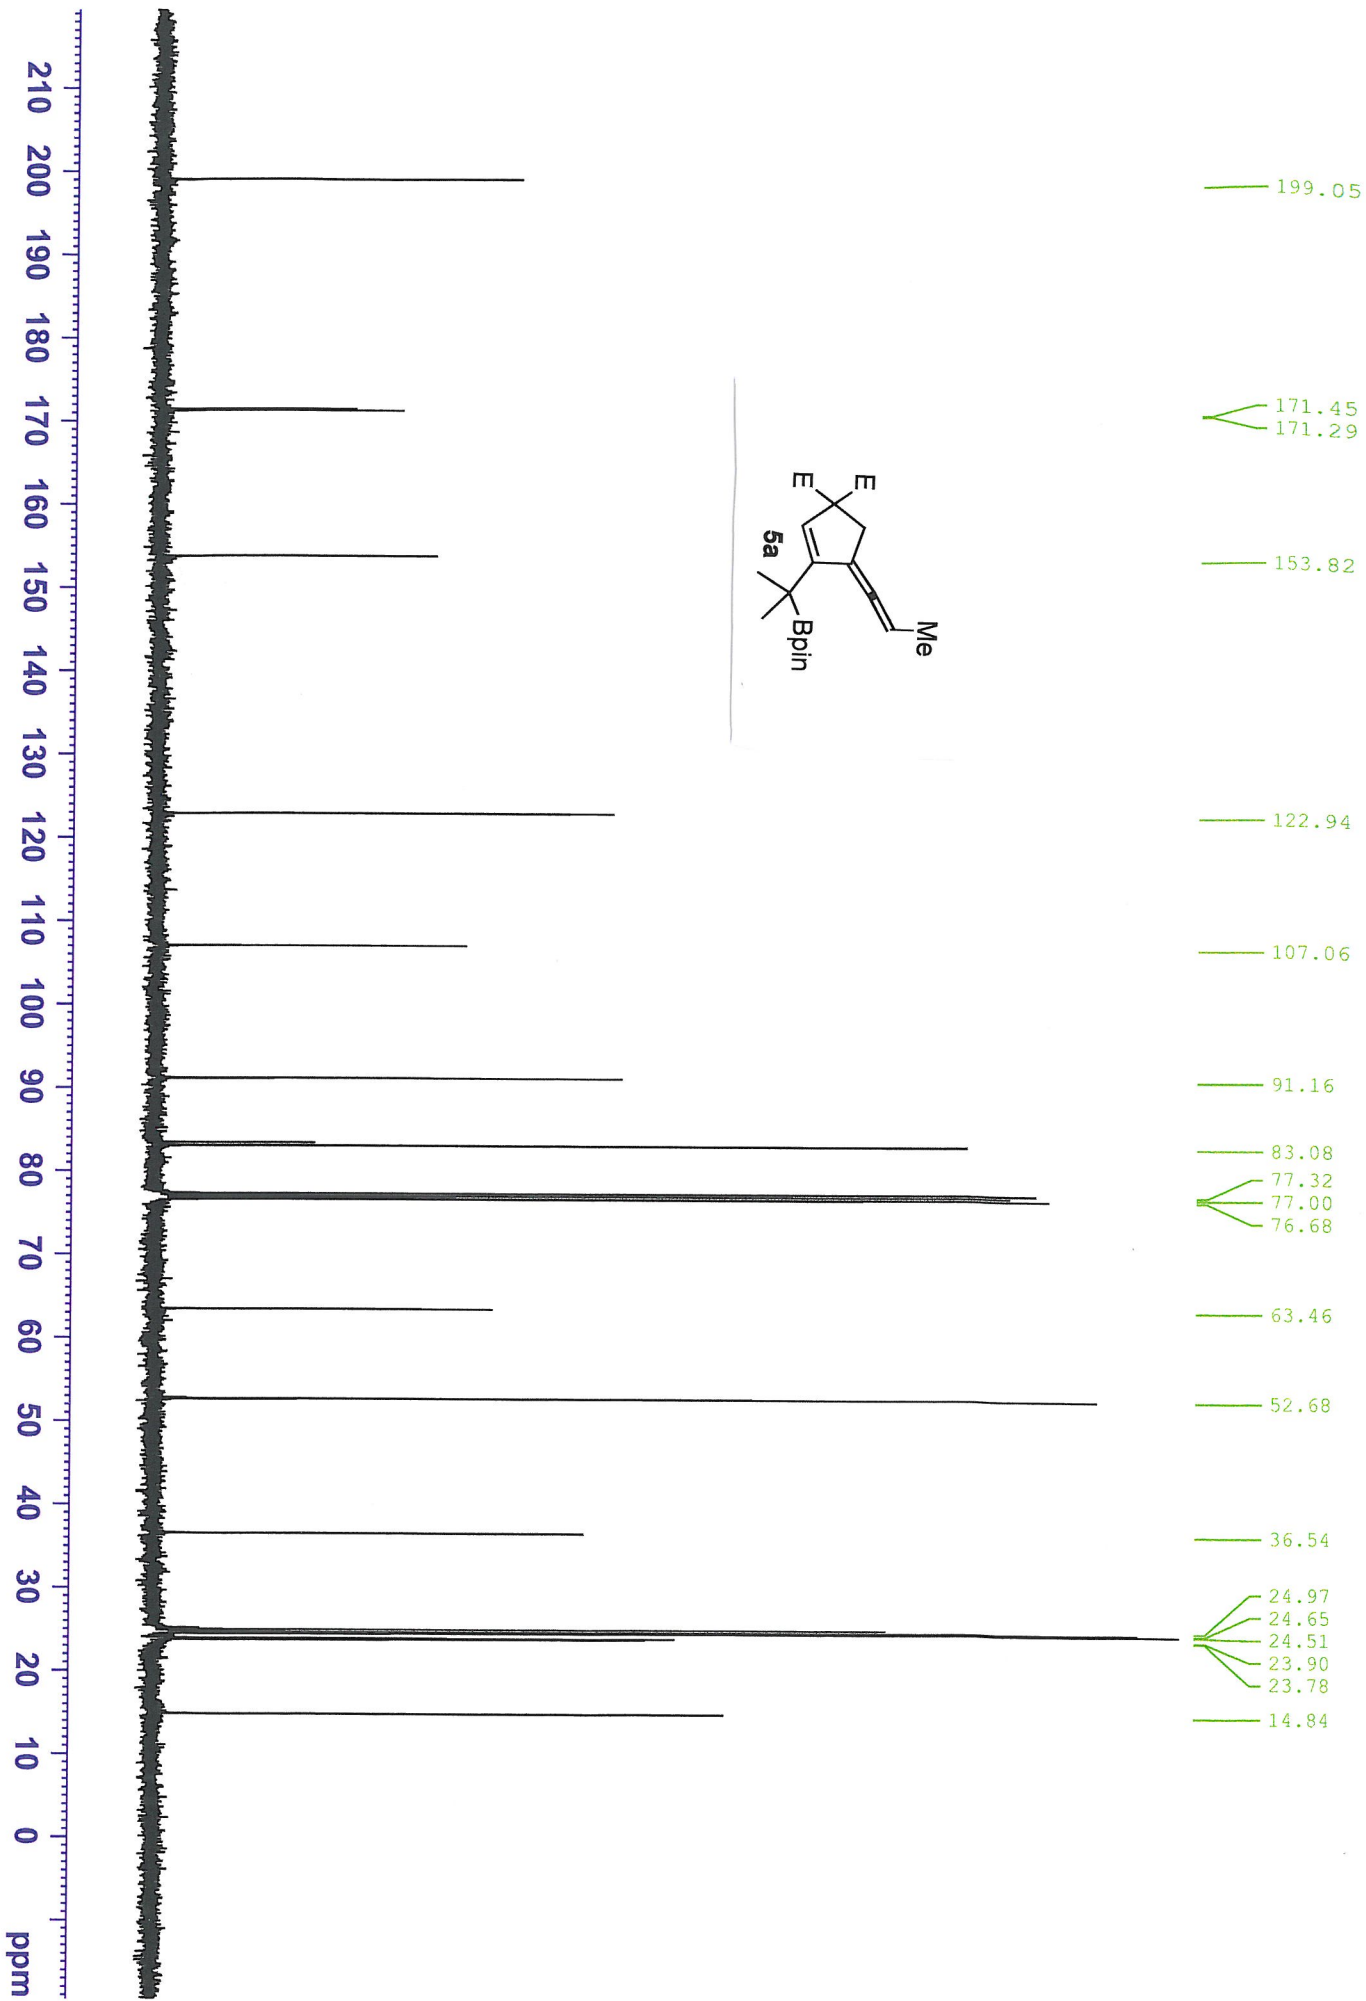

# Mass Spectrum SmartFormula Report

## Analysis Info

Analysis Name H:\Data2\Youqian\dyq-4-59000001.d  
Method tune\_wide\_dirk.m  
Sample Name  
Comment

Acquisition Date 2012-08-15 14:35:56

Operator pia  
Instrument / Ser# micrOTOF 125

## Acquisition Parameter

|             |            |                      |          |                  |           |
|-------------|------------|----------------------|----------|------------------|-----------|
| Source Type | ESI        | Ion Polarity         | Positive | Set Nebulizer    | 0.4 Bar   |
| Focus       | Not active |                      |          | Set Dry Heater   | 180 °C    |
| Scan Begin  | 50 m/z     | Set Capillary        | 4500 V   | Set Dry Gas      | 4.0 l/min |
| Scan End    | 3000 m/z   | Set End Plate Offset | -500 V   | Set Divert Valve | Source    |

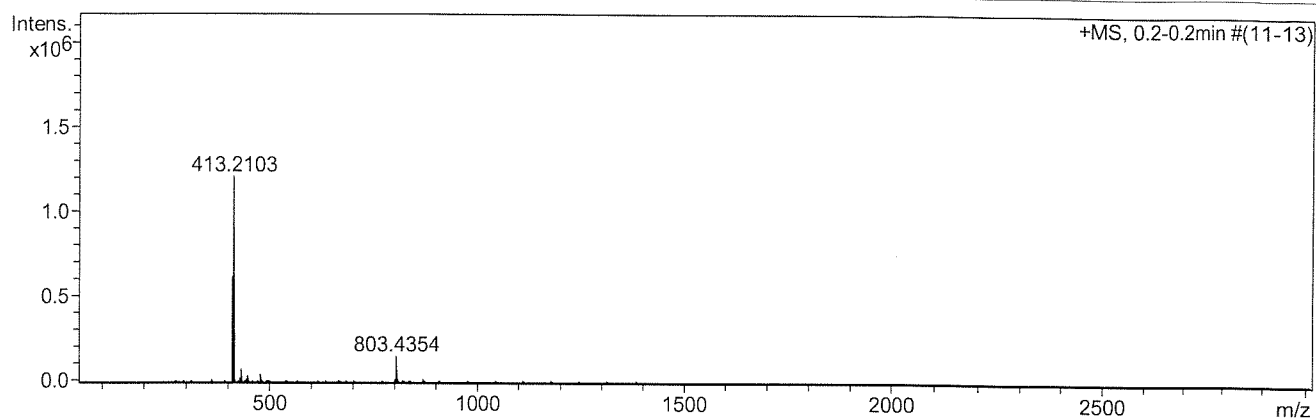

| Formula                                           | Meas. m/z | m/z      | err [ppm] | Mean err [ppm] |
|---------------------------------------------------|-----------|----------|-----------|----------------|
| C <sub>21</sub> H <sub>31</sub> BNaO <sub>6</sub> | 413.2103  | 413.2106 | 0.7       | 4.4            |

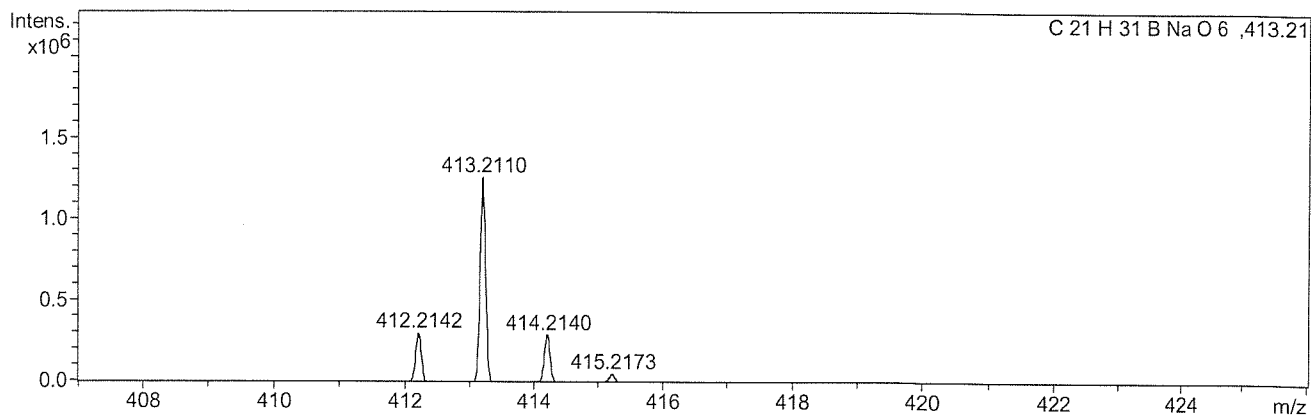

| Formula | Meas. m/z | m/z | err [ppm] | Mean err [ppm] |
|---------|-----------|-----|-----------|----------------|
|---------|-----------|-----|-----------|----------------|

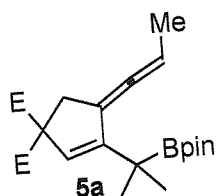

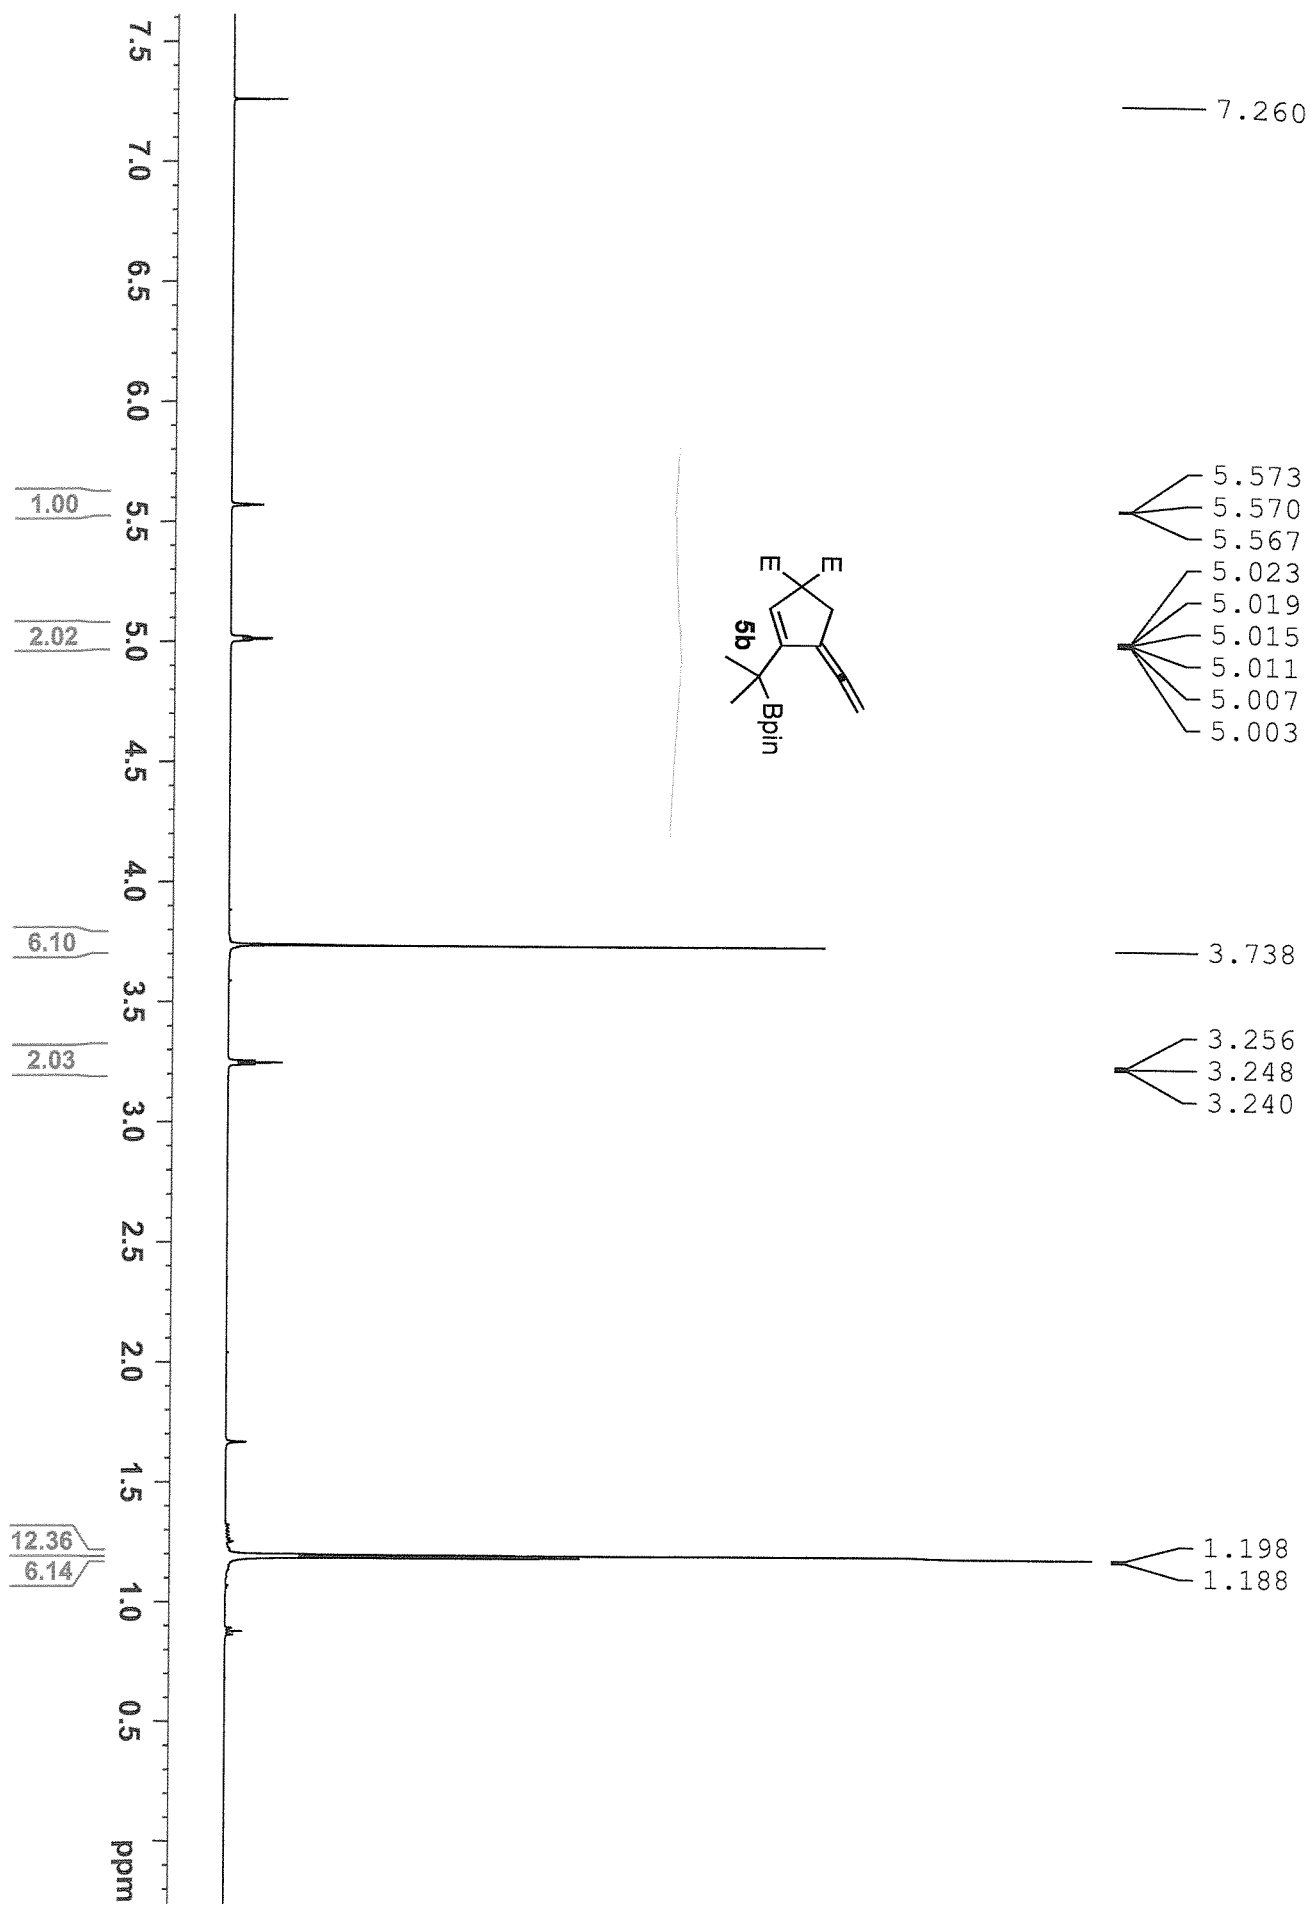

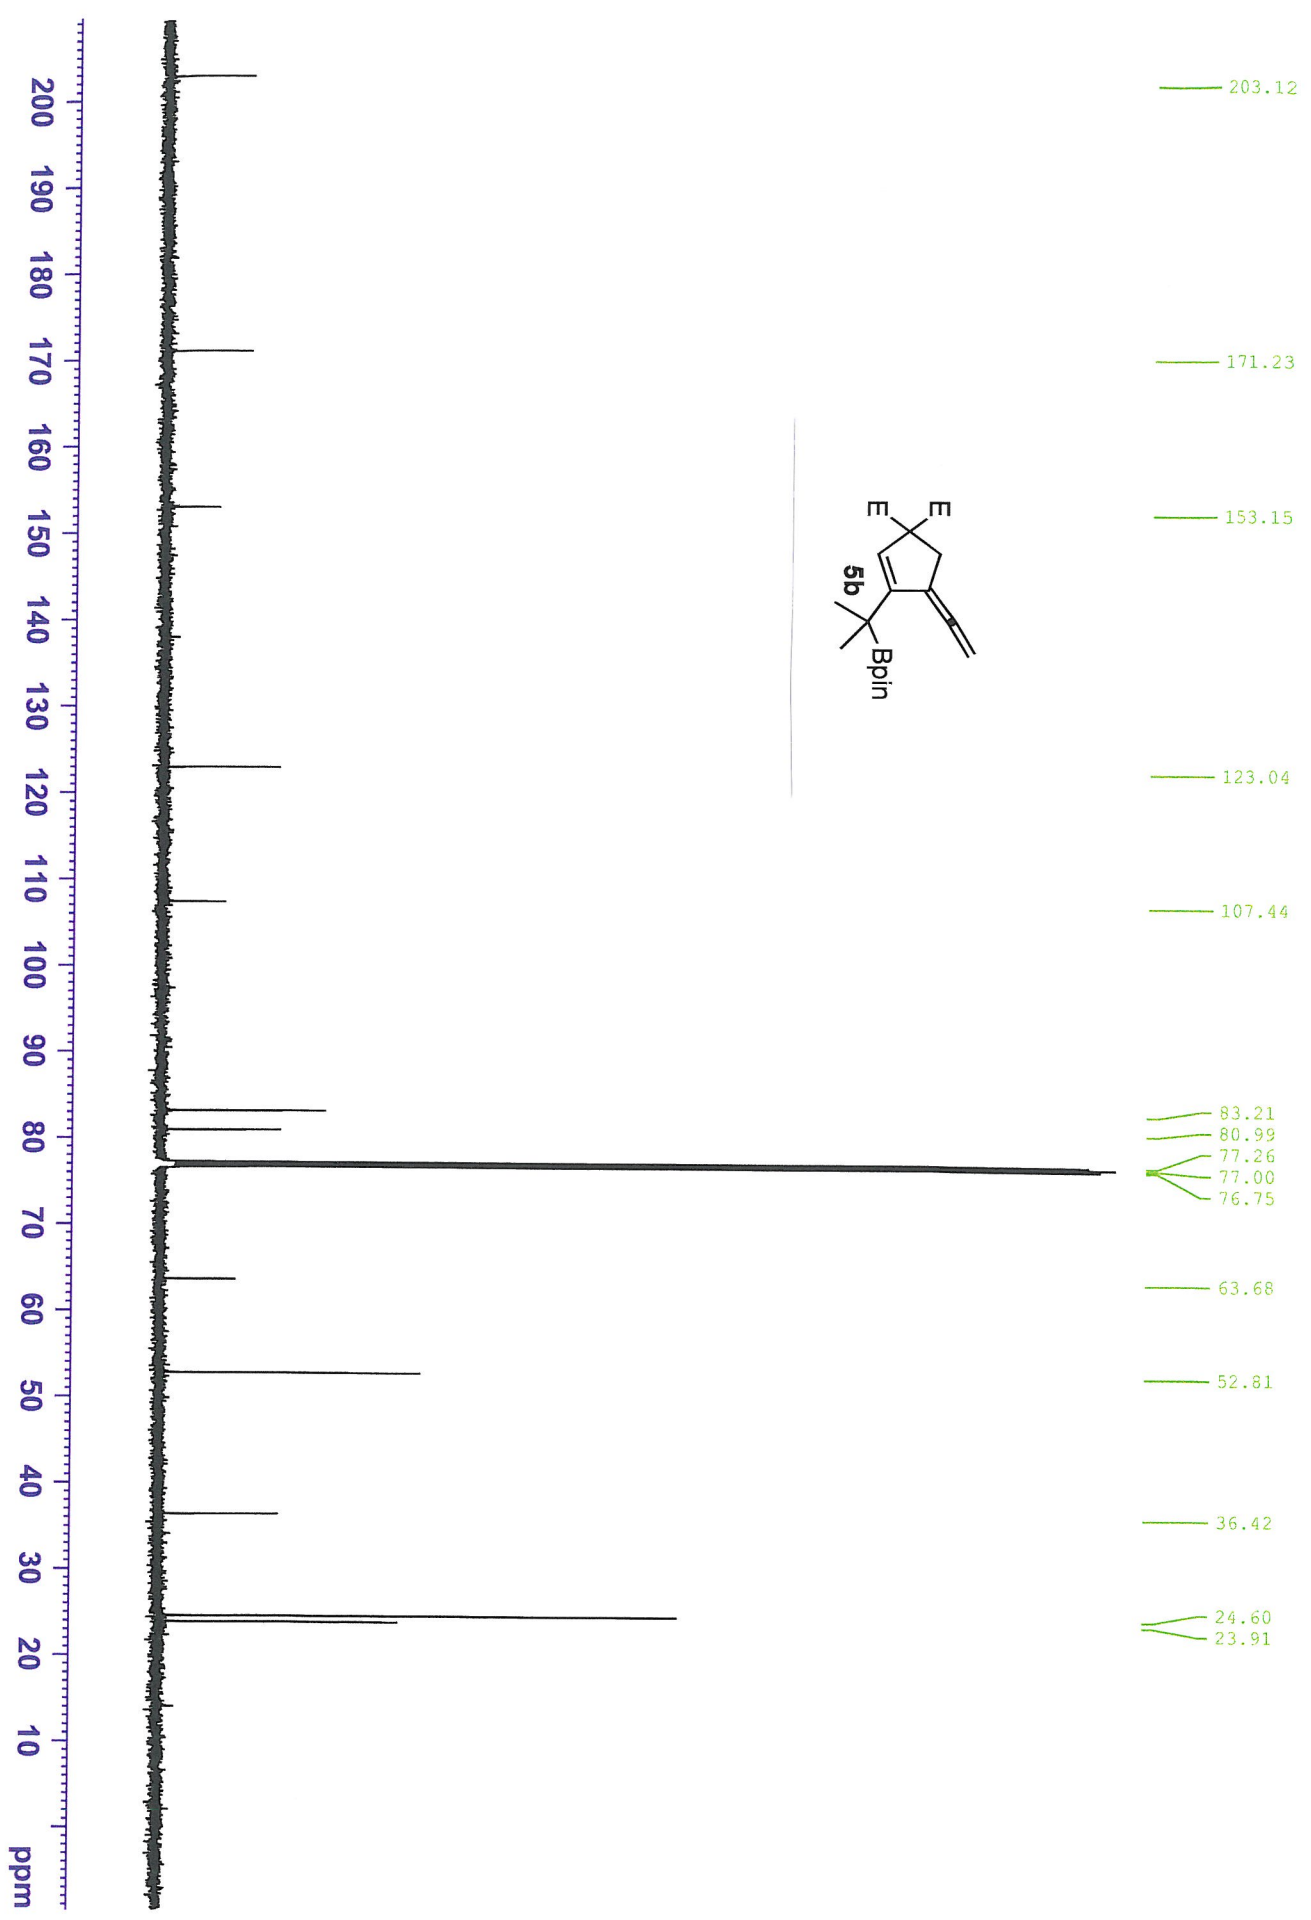

# Mass Spectrum SmartFormula Report

## Analysis Info

Analysis Name H:\Data2\Youqian\dyq-3-33-2000001.d  
Method tune\_wide\_dirk.m  
Sample Name dyq-3-33-2  
Comment

Acquisition Date 2011-12-07 11:36:40

Operator pia  
Instrument / Ser# micrOTOF 125

## Acquisition Parameter

|             |            |                      |          |                  |           |
|-------------|------------|----------------------|----------|------------------|-----------|
| Source Type | ESI        | Ion Polarity         | Positive | Set Nebulizer    | 0.4 Bar   |
| Focus       | Not active |                      |          | Set Dry Heater   | 180 °C    |
| Scan Begin  | 50 m/z     | Set Capillary        | 4500 V   | Set Dry Gas      | 4.0 l/min |
| Scan End    | 3000 m/z   | Set End Plate Offset | -500 V   | Set Divert Valve | Source    |

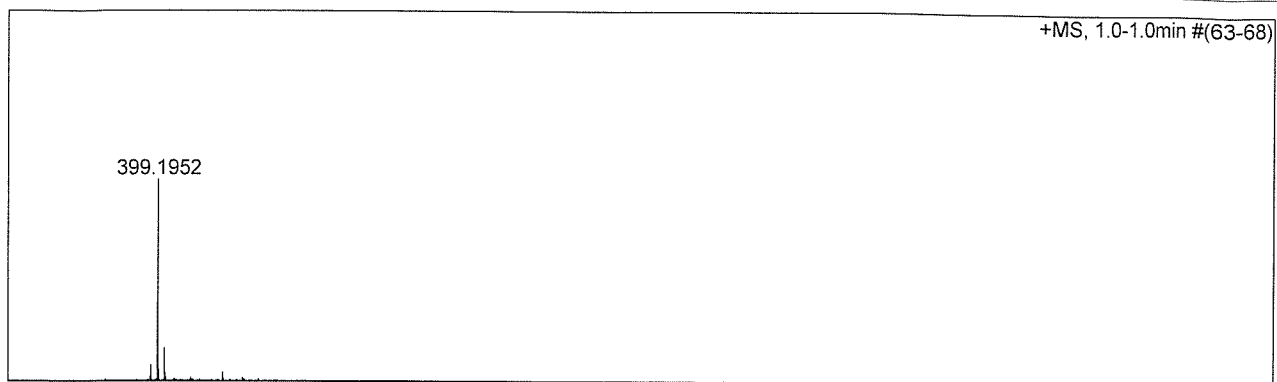

| Formula                                           | Meas. m/z | m/z      | err [ppm] | Mean err [ppm] |
|---------------------------------------------------|-----------|----------|-----------|----------------|
| C <sub>20</sub> H <sub>29</sub> BNaO <sub>6</sub> | 399.1952  | 399.1949 | -0.6      | 4.7            |

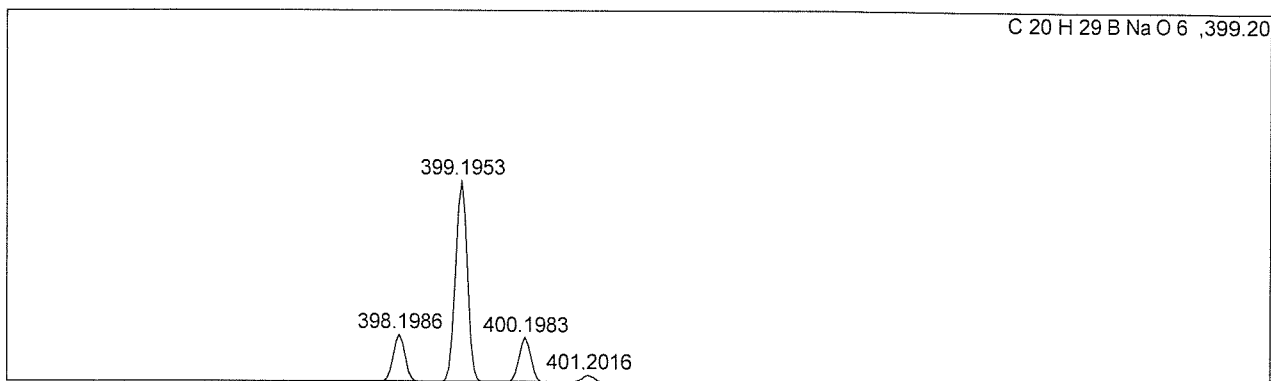

| Formula | Meas. m/z | m/z | err [ppm] | Mean err [ppm] |
|---------|-----------|-----|-----------|----------------|
|---------|-----------|-----|-----------|----------------|

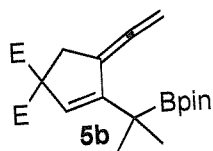



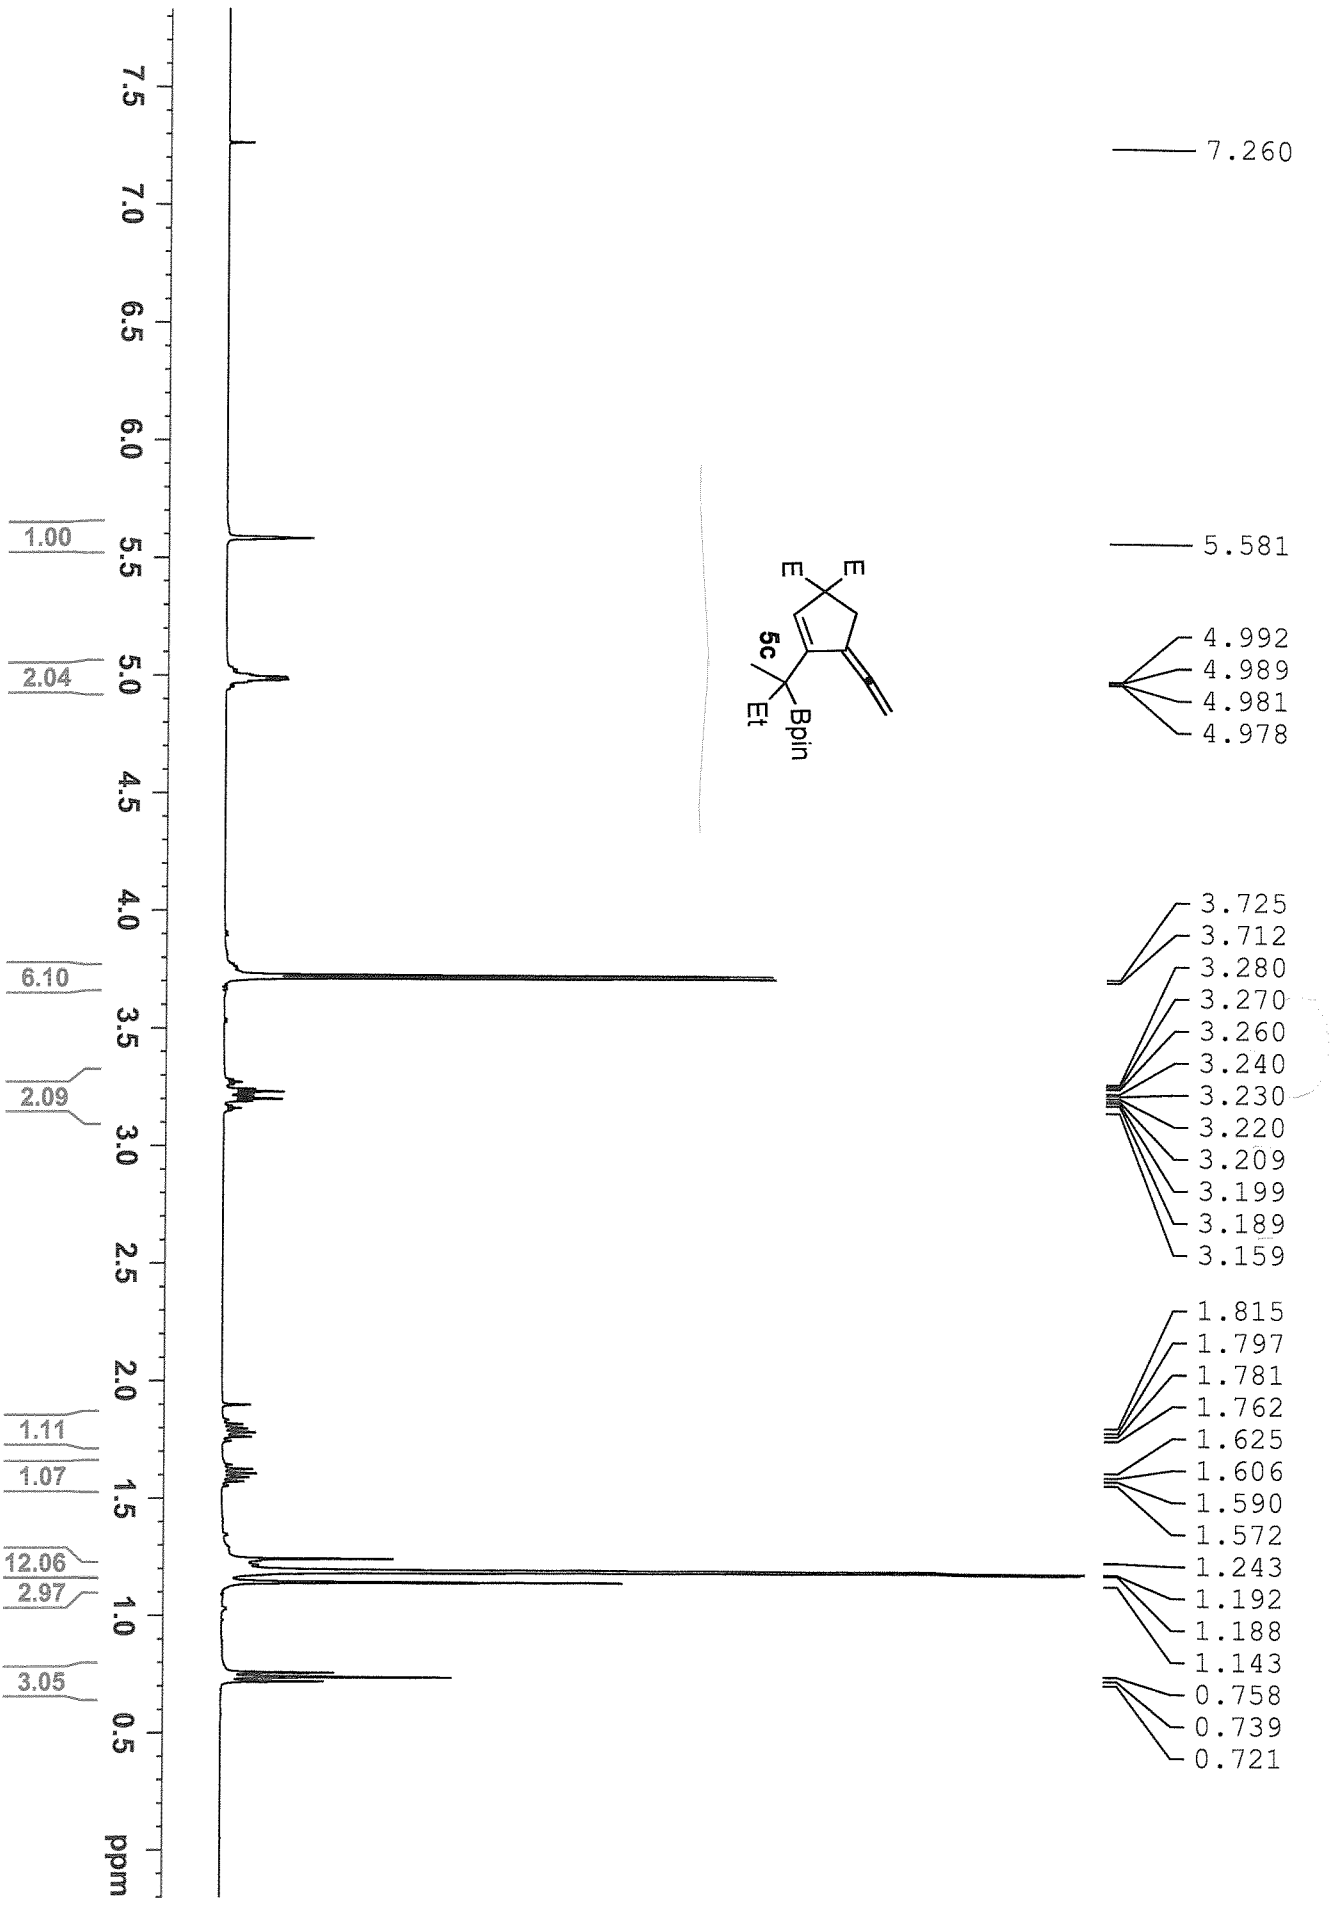

210 200 190 180 170 160 150 140 130 120 110 100 90 80 70 60 50 40 30 20 10 0 ppm

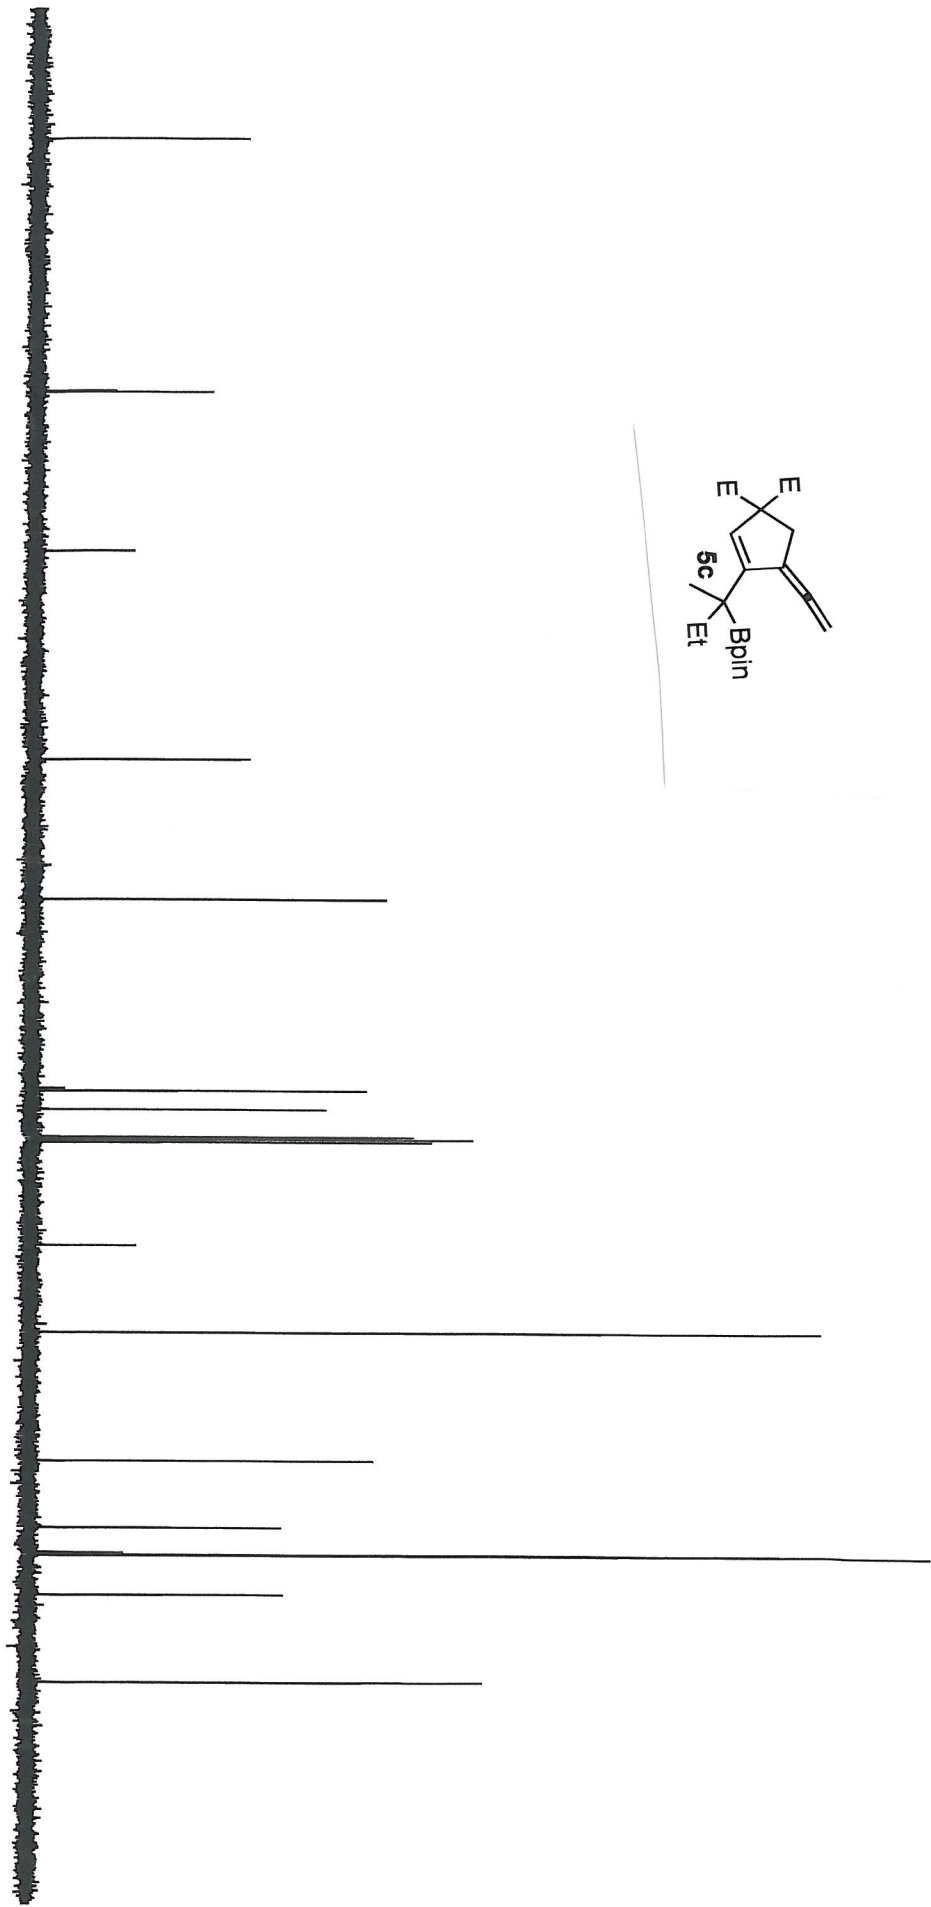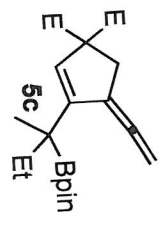

- 203.00
- 171.26
- 171.08
- 151.10
- 124.83
- 107.23
- 83.13
- 80.78
- 77.32
- 77.00
- 76.68
- 63.66
- 52.71
- 36.53
- 28.09
- 24.98
- 24.70
- 24.62
- 19.62
- 8.58

# Mass Spectrum SmartFormula Report

## Analysis Info

Analysis Name H:\Data2\Youqian\dyq-3-179000001.d  
Method tune\_wide\_dirk.m  
Sample Name dyq-3-179  
Comment

Acquisition Date 2012-04-30 10:37:06

Operator pia  
Instrument / Ser# micrOTOF 125

## Acquisition Parameter

|             |            |                      |          |                  |           |
|-------------|------------|----------------------|----------|------------------|-----------|
| Source Type | ESI        | Ion Polarity         | Positive | Set Nebulizer    | 0.4 Bar   |
| Focus       | Not active |                      |          | Set Dry Heater   | 180 °C    |
| Scan Begin  | 50 m/z     | Set Capillary        | 4500 V   | Set Dry Gas      | 4.0 l/min |
| Scan End    | 3000 m/z   | Set End Plate Offset | -500 V   | Set Divert Valve | Source    |

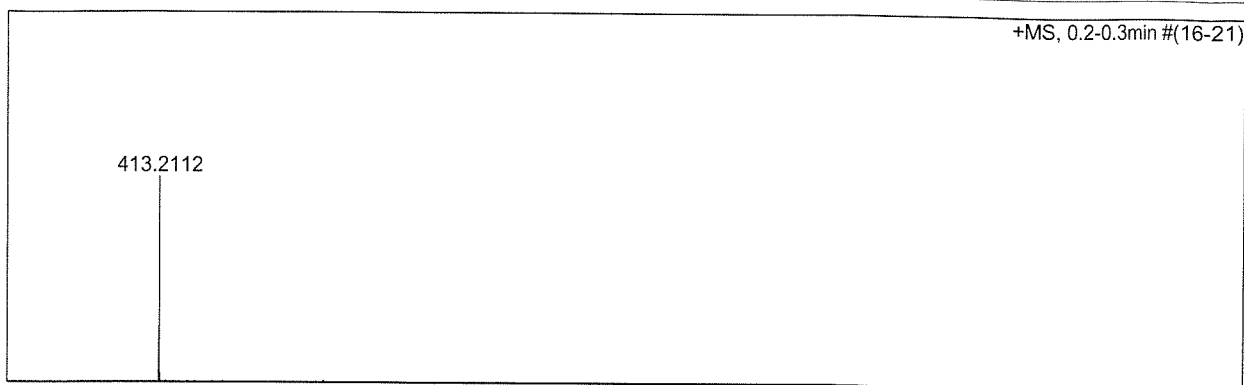

| Formula                                           | Meas. m/z | m/z      | err [ppm] | Mean err [ppm] |
|---------------------------------------------------|-----------|----------|-----------|----------------|
| C <sub>21</sub> H <sub>31</sub> BNaO <sub>6</sub> | 413.2112  | 413.2106 | -1.4      | 1.4            |

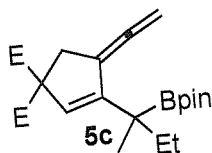

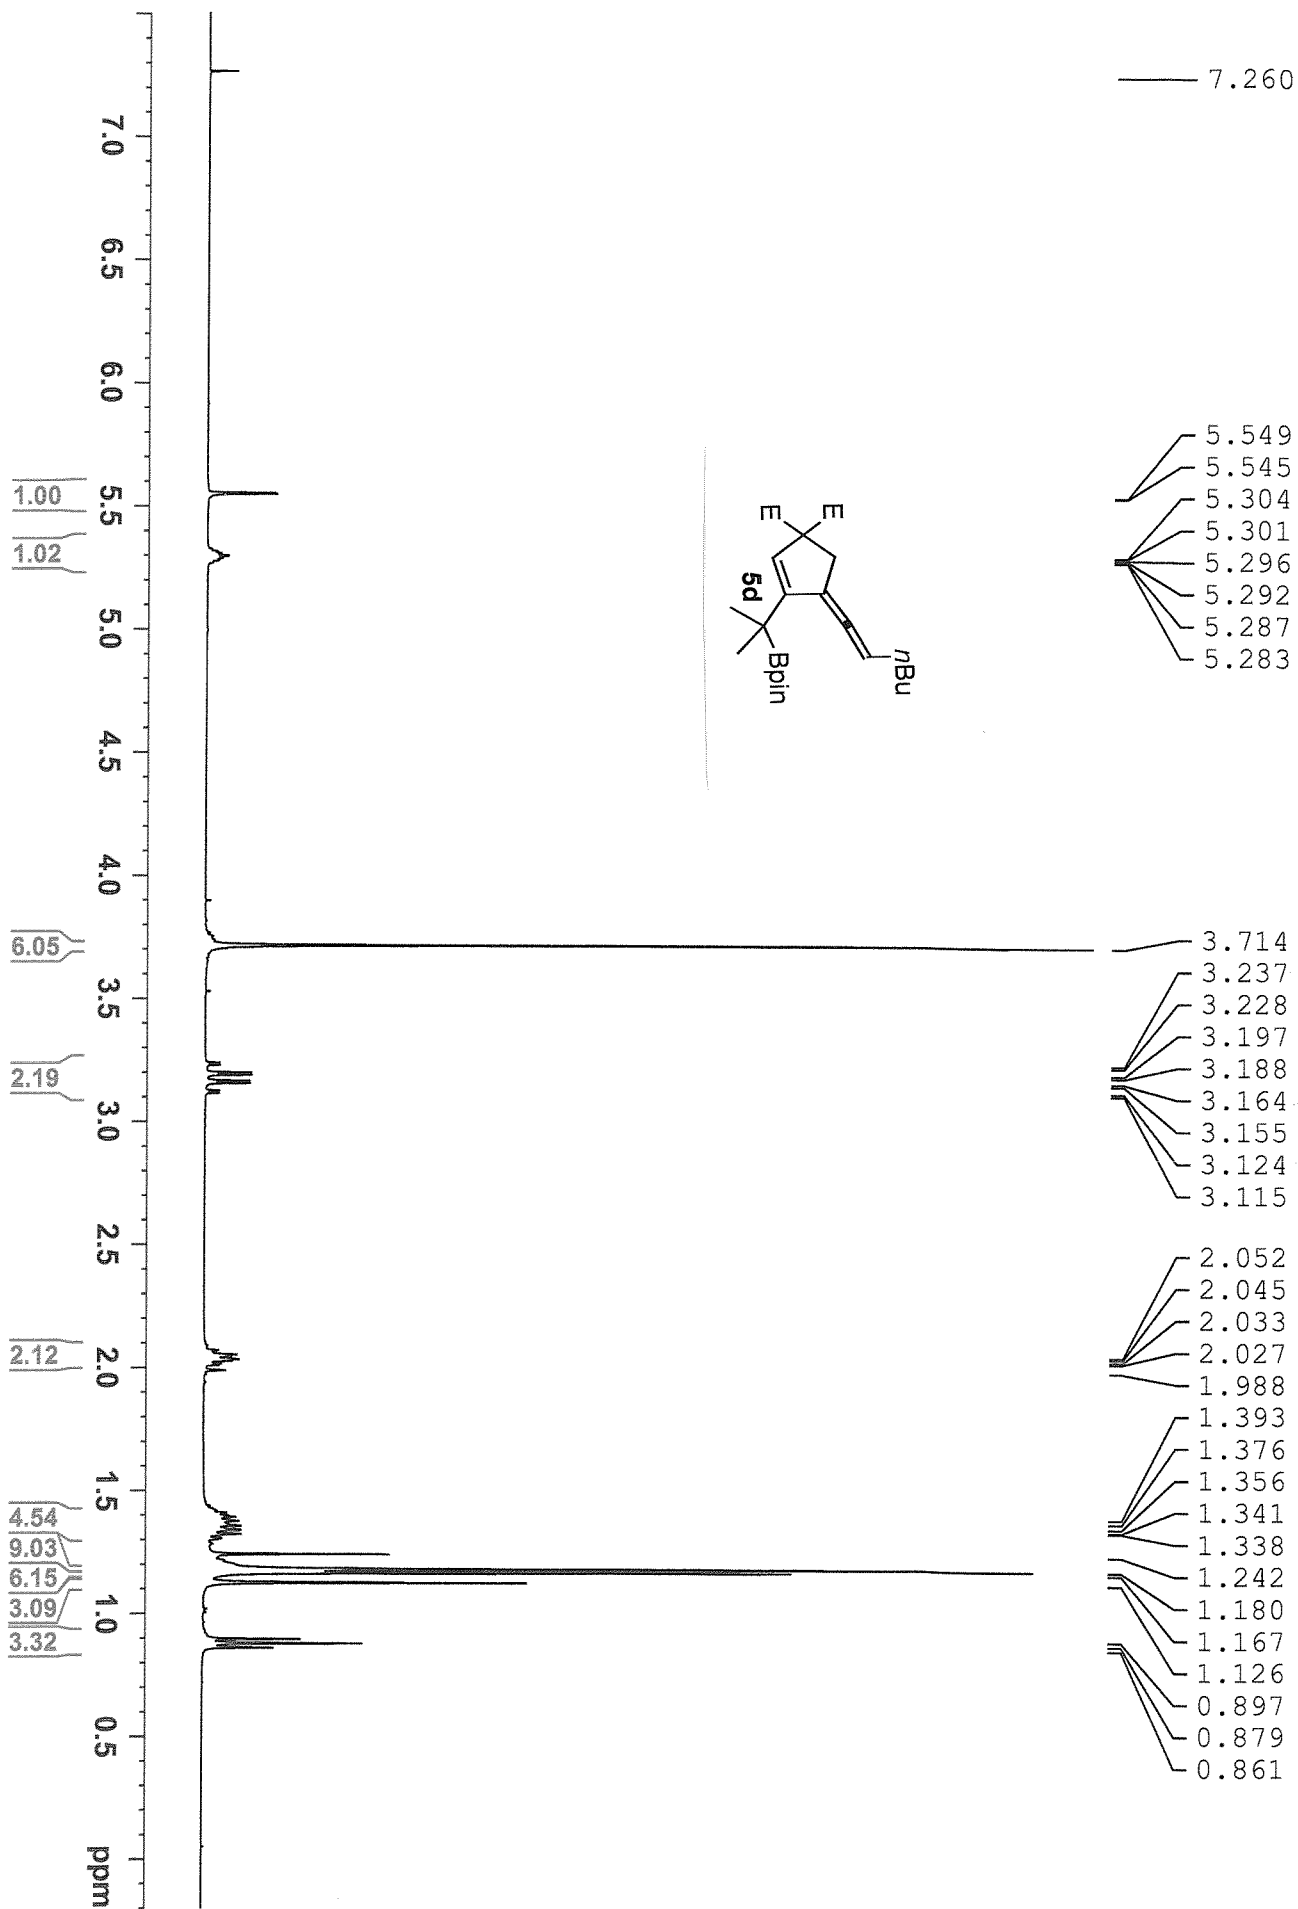

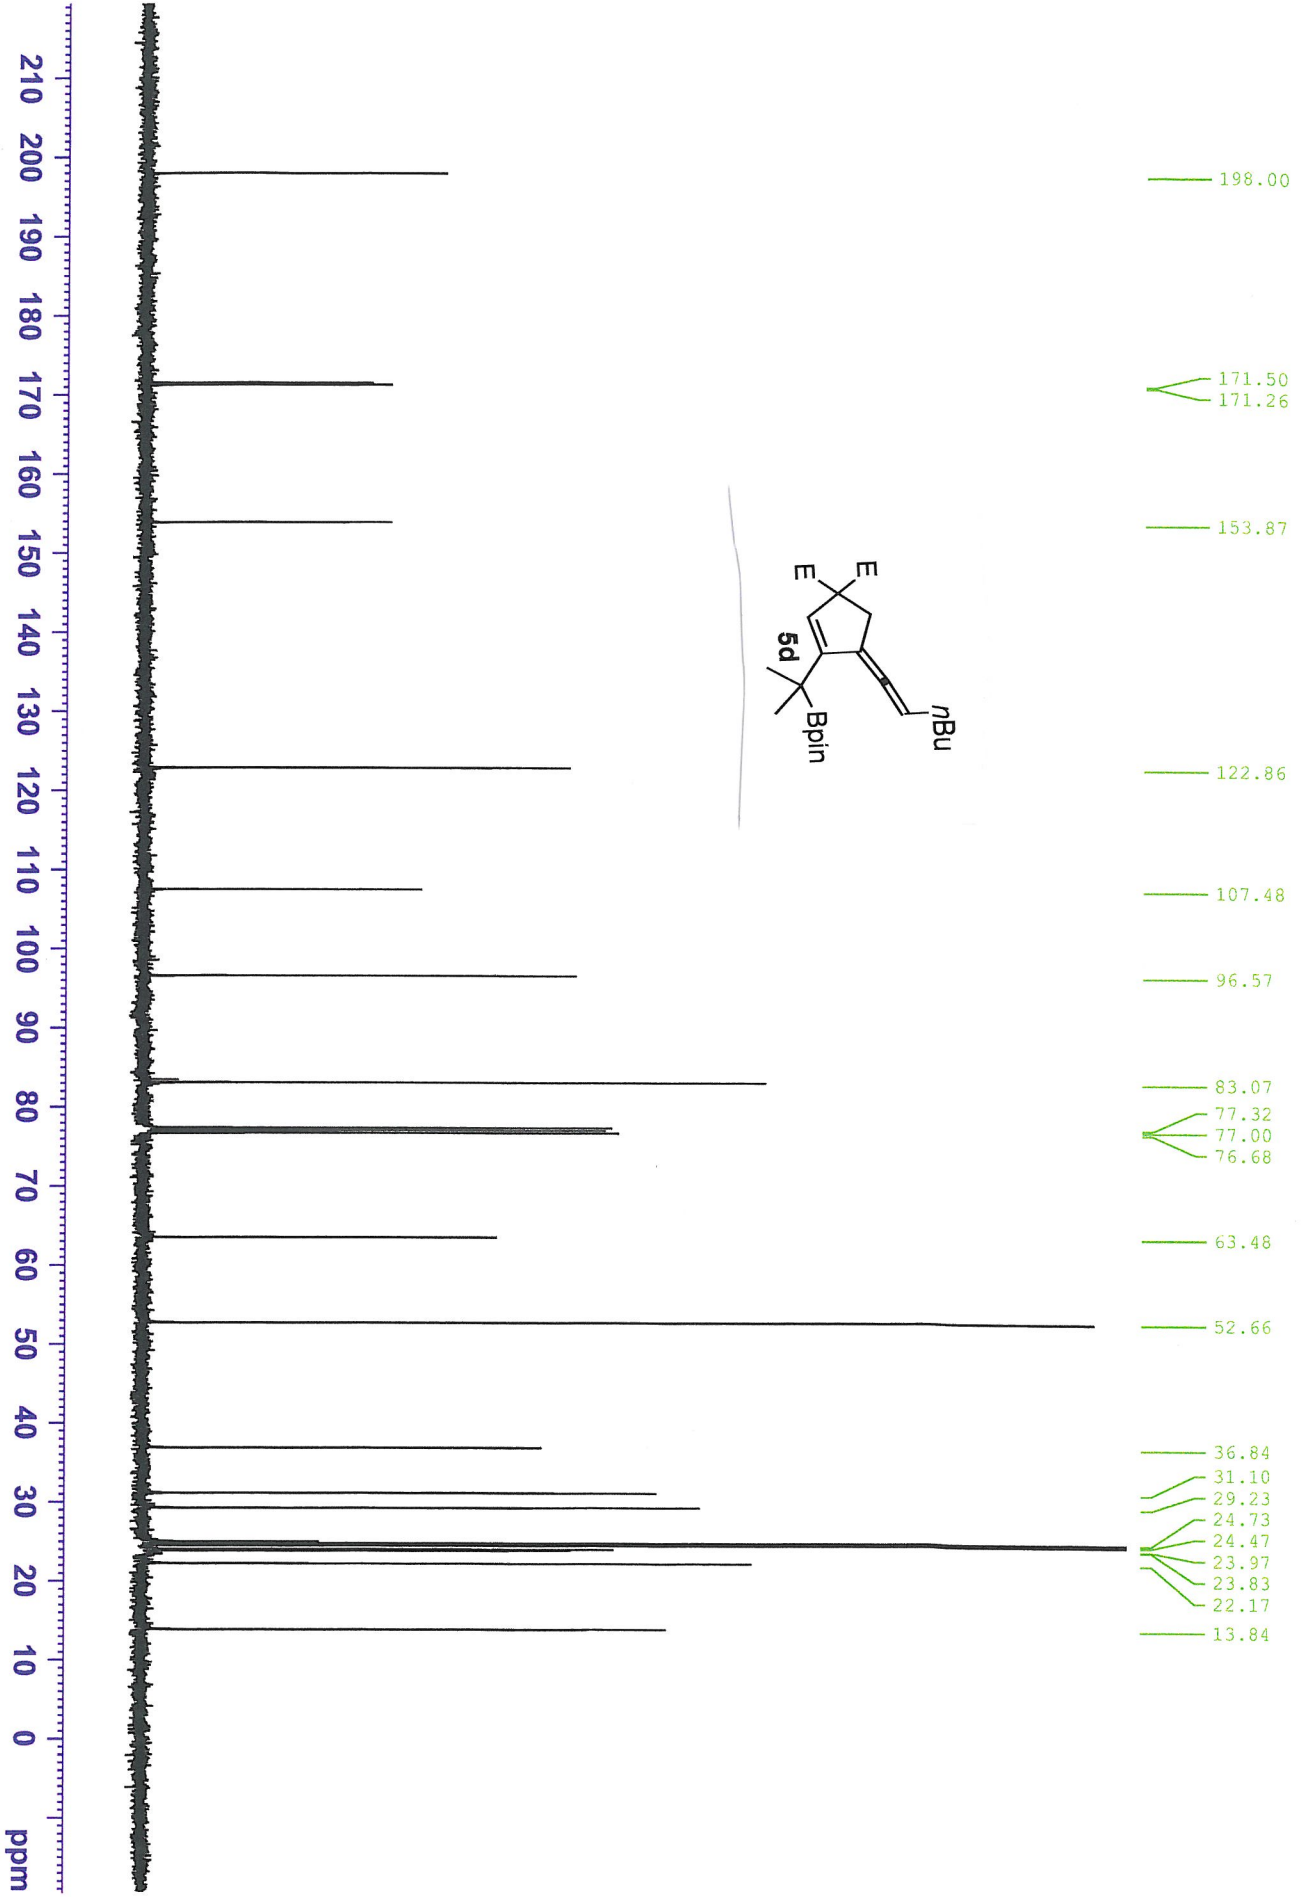

# Mass Spectrum SmartFormula Report

## Analysis Info

Analysis Name H:\Data2\Youqian\dyq-3-167000002.d  
Method tune\_wide\_dirk.m  
Sample Name dyq-3-167  
Comment

Acquisition Date 2012-04-26 18:08:48

Operator pia  
Instrument / Ser# micrOTOF 125

## Acquisition Parameter

|             |            |                      |          |                  |           |
|-------------|------------|----------------------|----------|------------------|-----------|
| Source Type | ESI        | Ion Polarity         | Positive | Set Nebulizer    | 0.4 Bar   |
| Focus       | Not active |                      |          | Set Dry Heater   | 180 °C    |
| Scan Begin  | 50 m/z     | Set Capillary        | 4500 V   | Set Dry Gas      | 4.0 l/min |
| Scan End    | 3000 m/z   | Set End Plate Offset | -500 V   | Set Divert Valve | Source    |

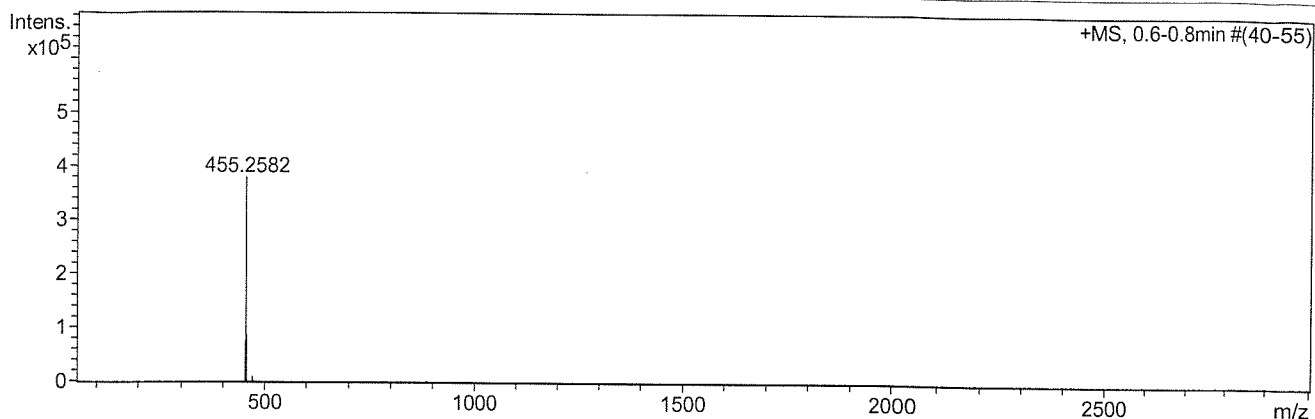

| Formula            | Meas. m/z | m/z      | err [ppm] | Mean err [ppm] |
|--------------------|-----------|----------|-----------|----------------|
| C 24 H 37 B Na O 6 | 455.2582  | 455.2575 | -1.5      | -0.2           |
| C 24 H 37 B Na O 6 | 456.2605  | 455.2575 | 1.5       | -0.2           |

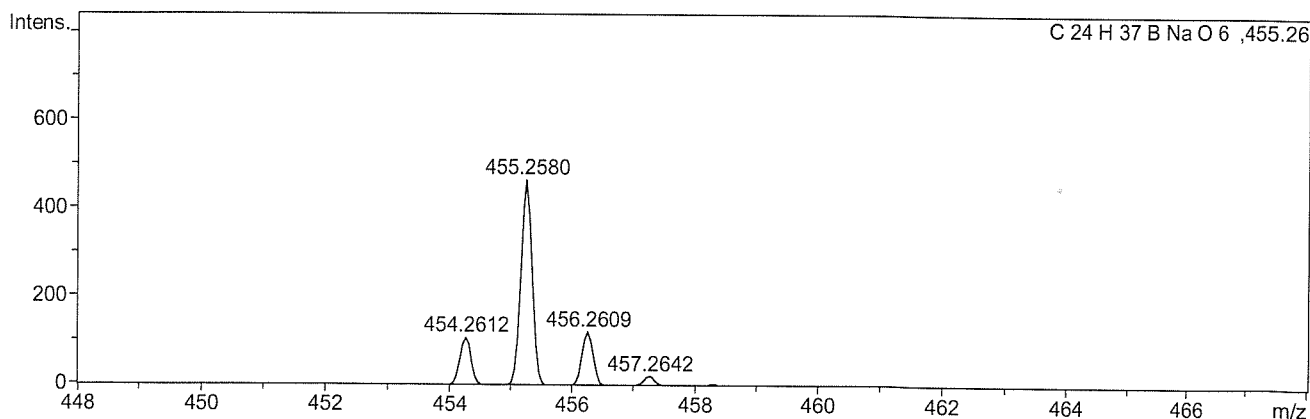

| Formula | Meas. m/z | m/z | err [ppm] | Mean err [ppm] |
|---------|-----------|-----|-----------|----------------|
|---------|-----------|-----|-----------|----------------|

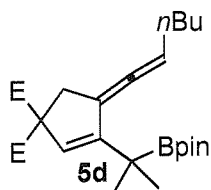

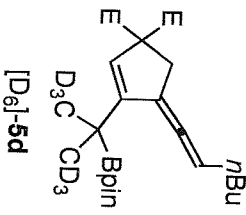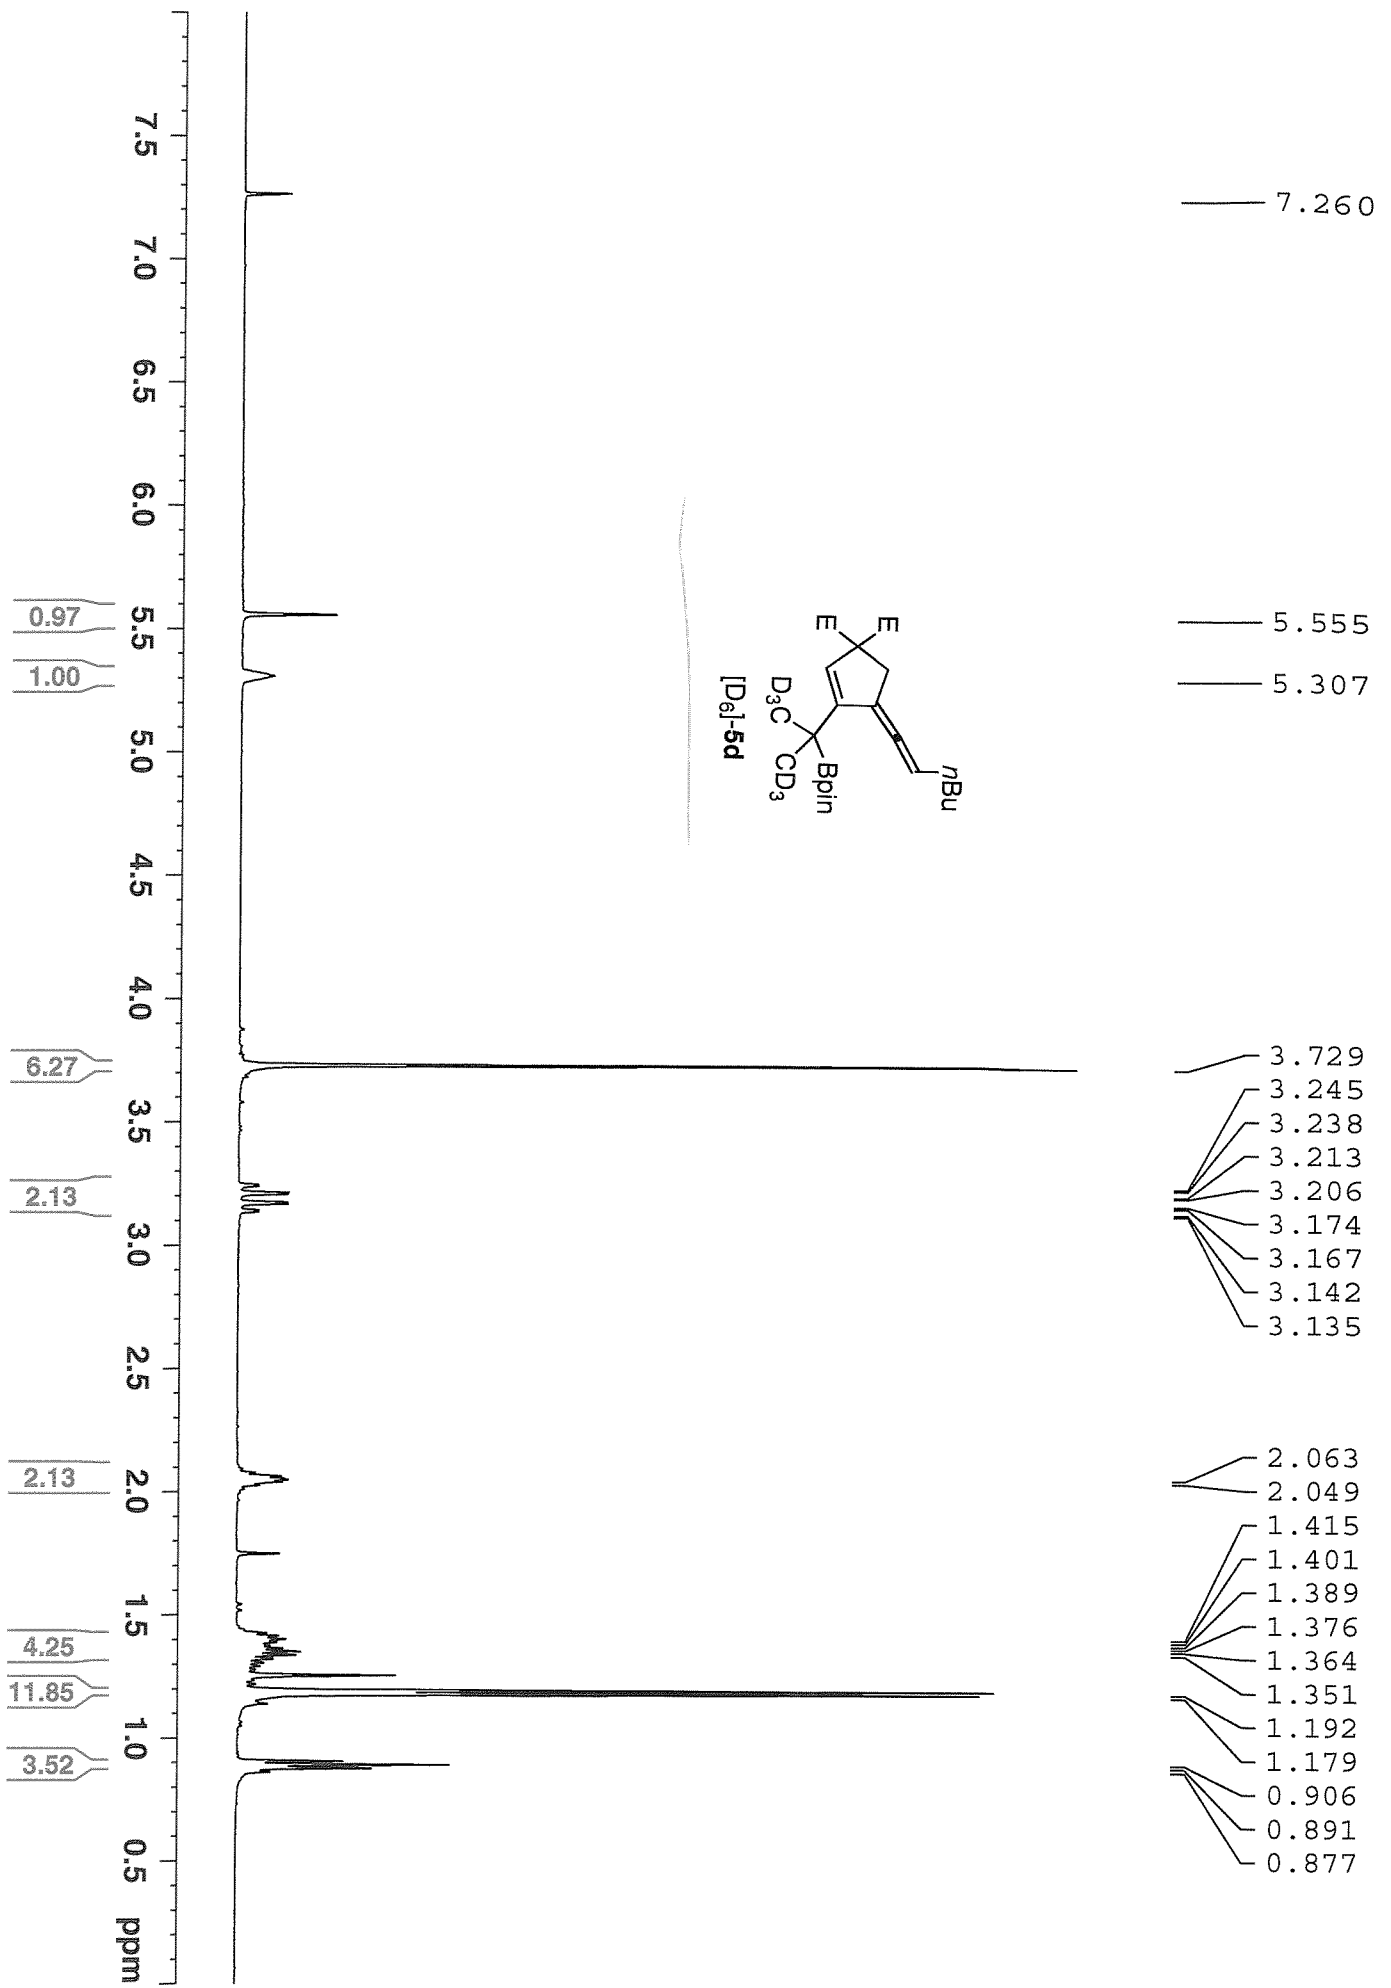

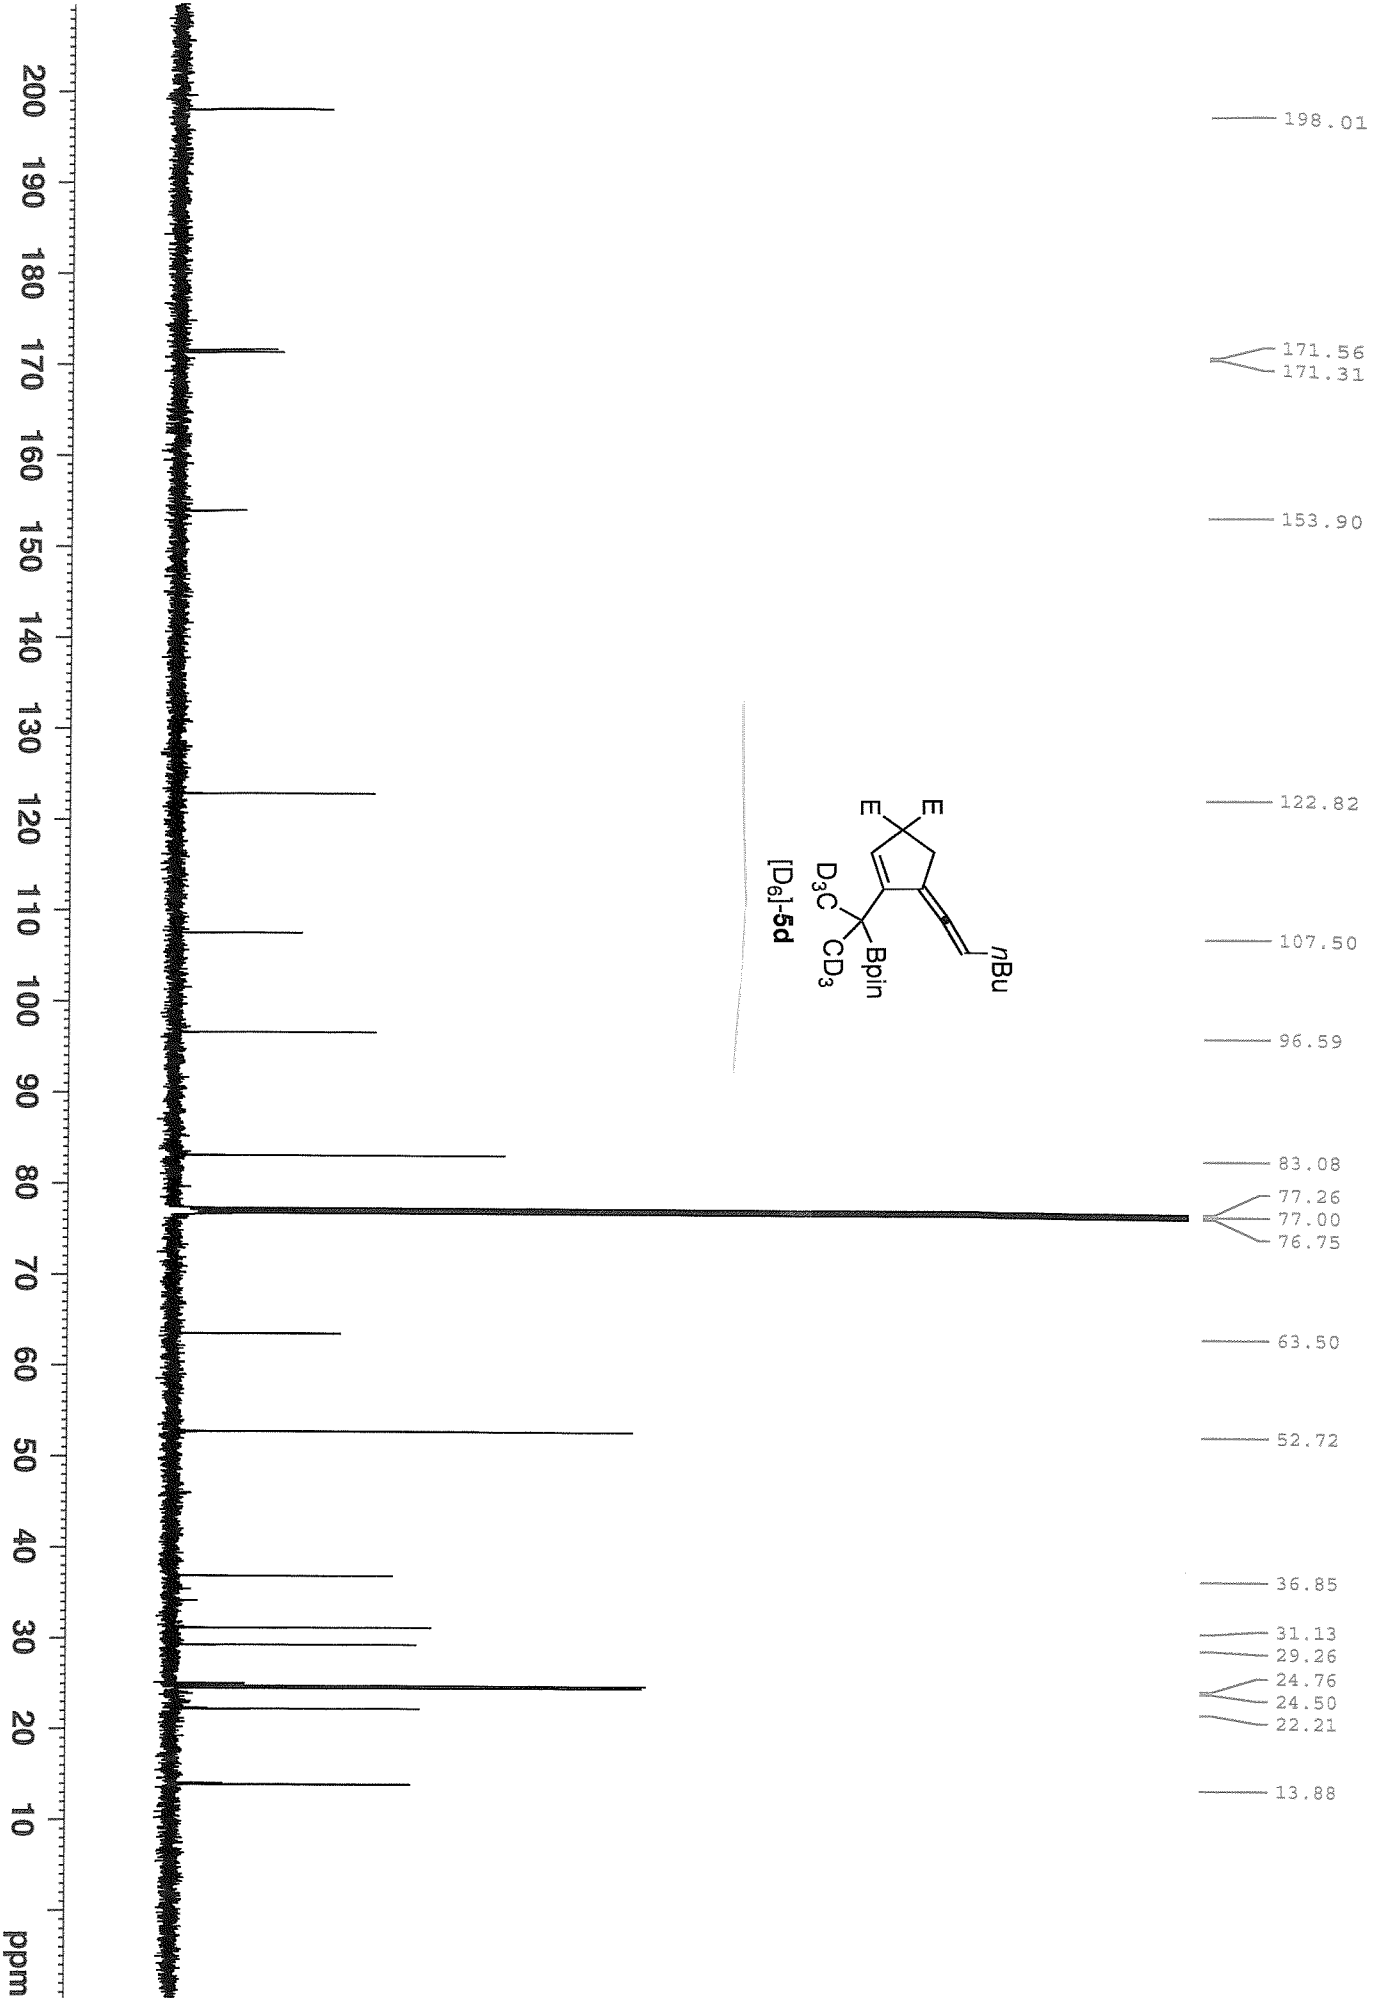



# Mass Spectrum SmartFormula Report

## Analysis Info

Analysis Name E:\Data2\Youqian\dyq-4-185000001.d  
Method Tune\_low\_pos.m  
Sample Name dyq-4-185  
Comment

Acquisition Date 2012-12-07 18:34:02

Operator Carin Larsson  
Instrument / Ser# micrOTOF 125

## Acquisition Parameter

|             |            |                      |          |                  |           |
|-------------|------------|----------------------|----------|------------------|-----------|
| Source Type | ESI        | Ion Polarity         | Positive | Set Nebulizer    | 0.4 Bar   |
| Focus       | Not active |                      |          | Set Dry Heater   | 180 °C    |
| Scan Begin  | 50 m/z     | Set Capillary        | 4000 V   | Set Dry Gas      | 4.0 l/min |
| Scan End    | 1000 m/z   | Set End Plate Offset | -500 V   | Set Divert Valve | Source    |

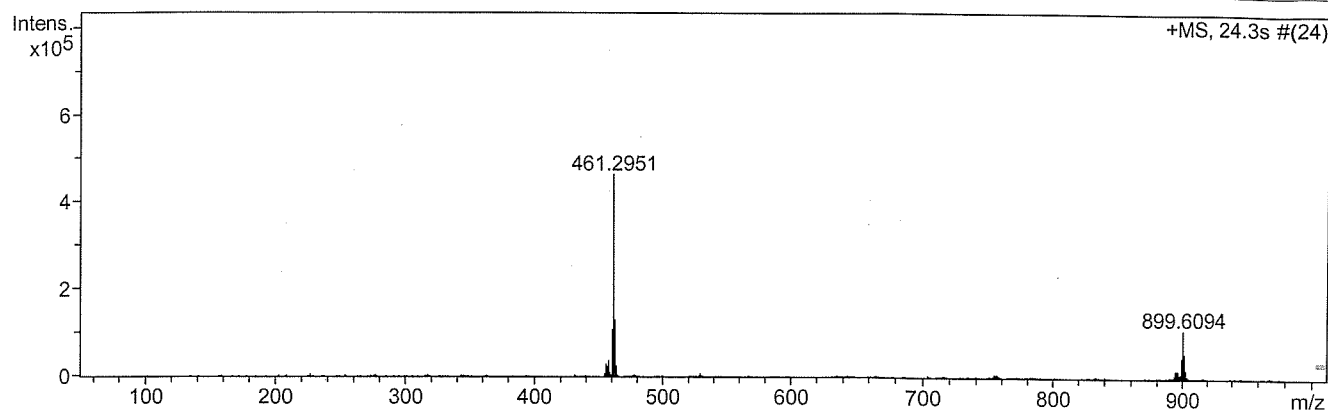

| Formula                | Meas. m/z | m/z      | err [ppm] | Mean err [ppm] |
|------------------------|-----------|----------|-----------|----------------|
| C 24 H 31 B D 6 Na O 6 | 461.2951  | 461.2956 | 0.2       | 1.7            |

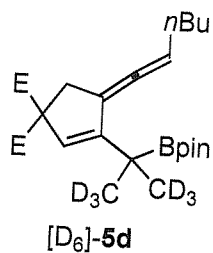

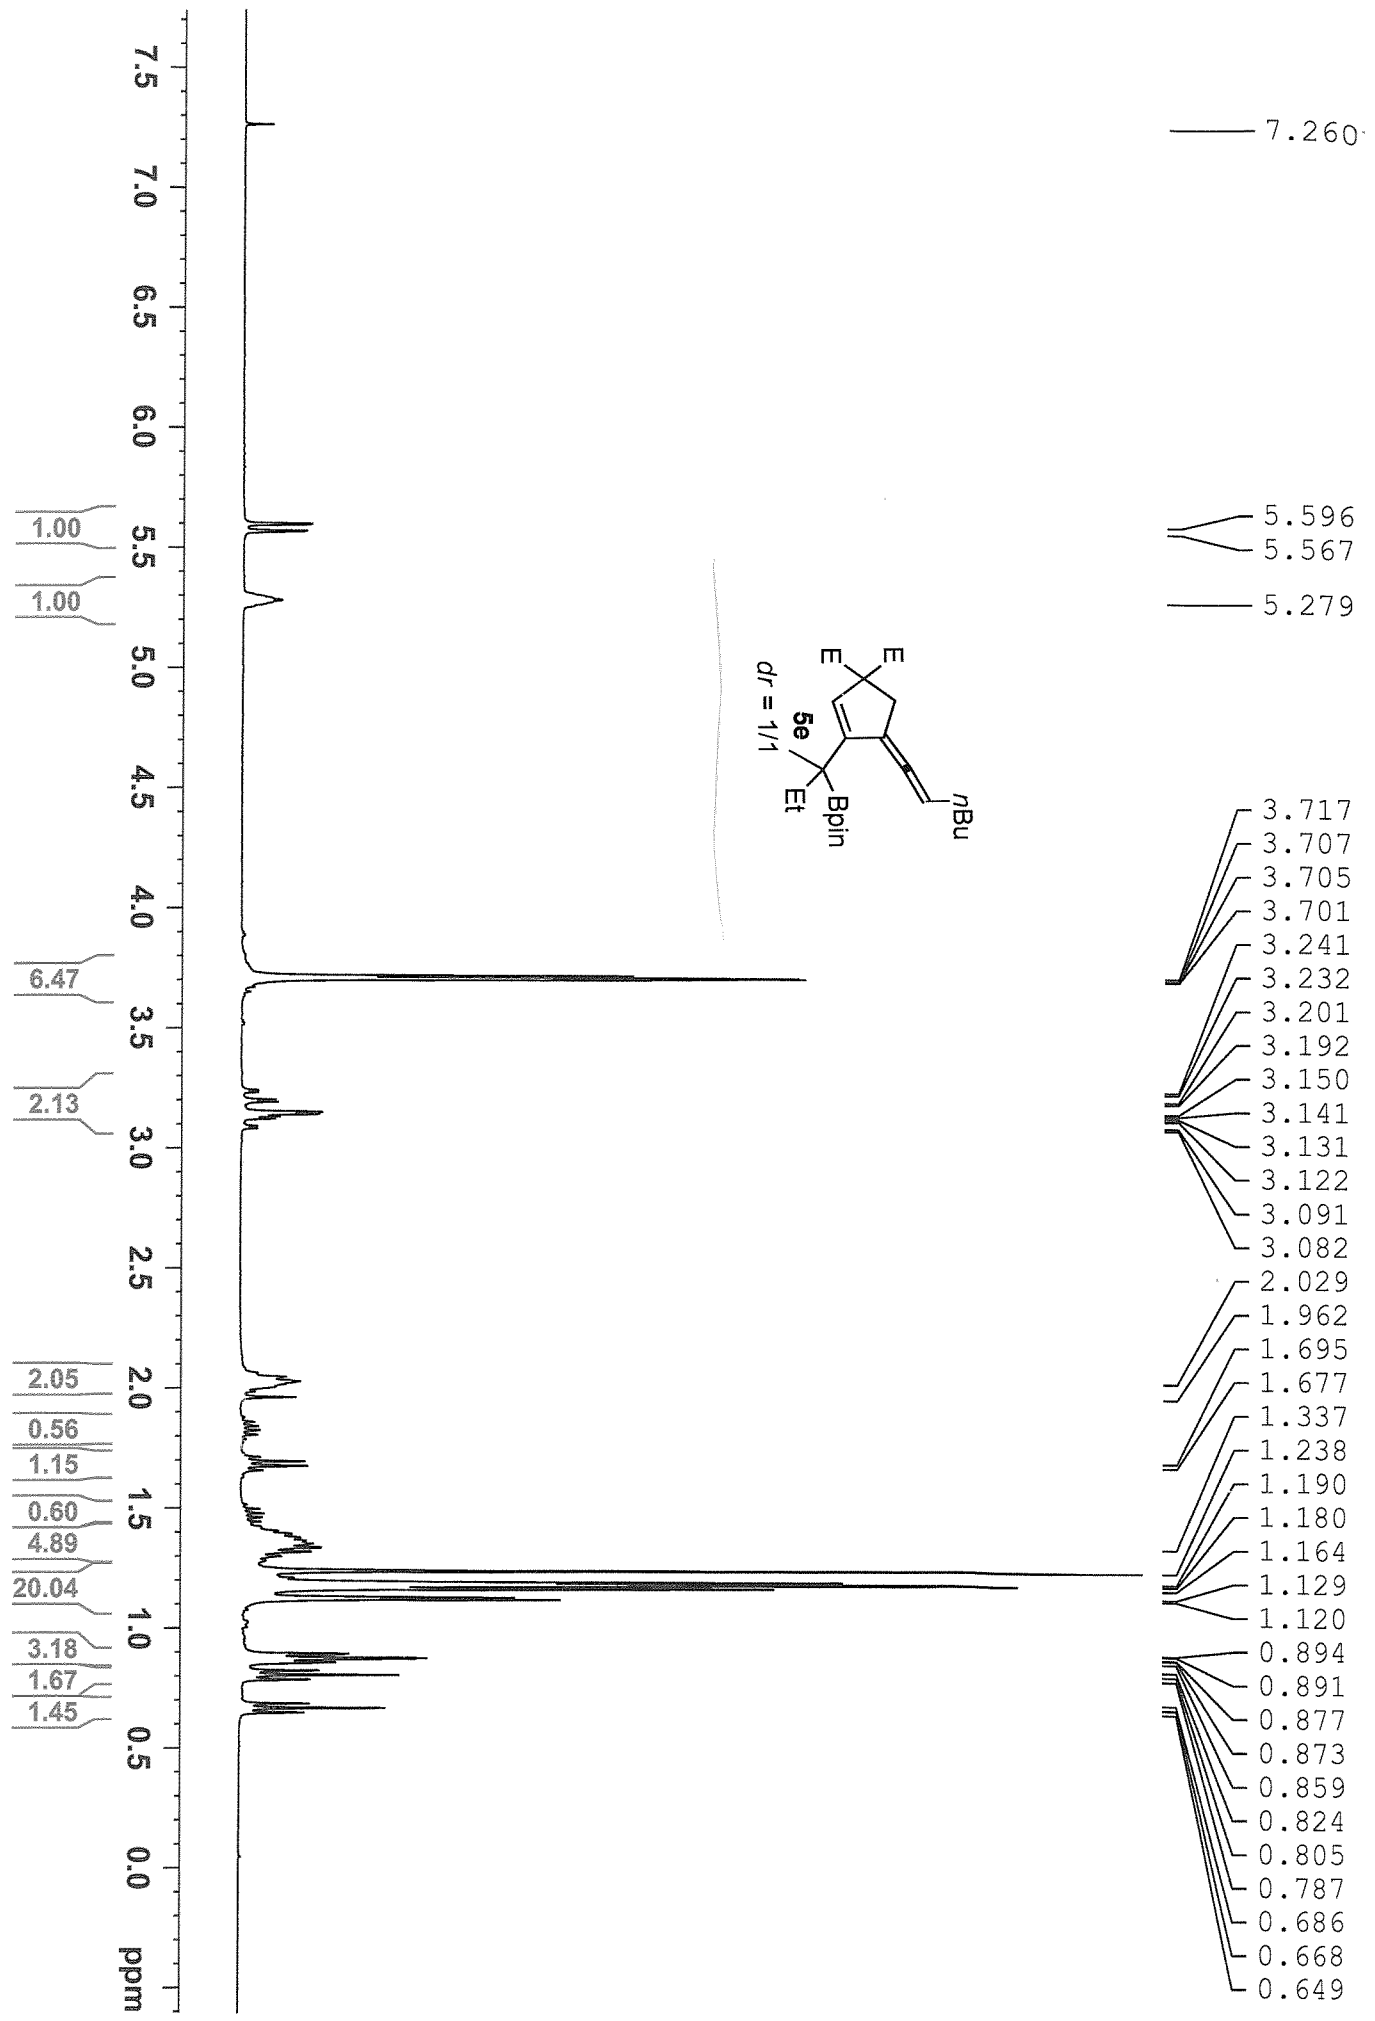

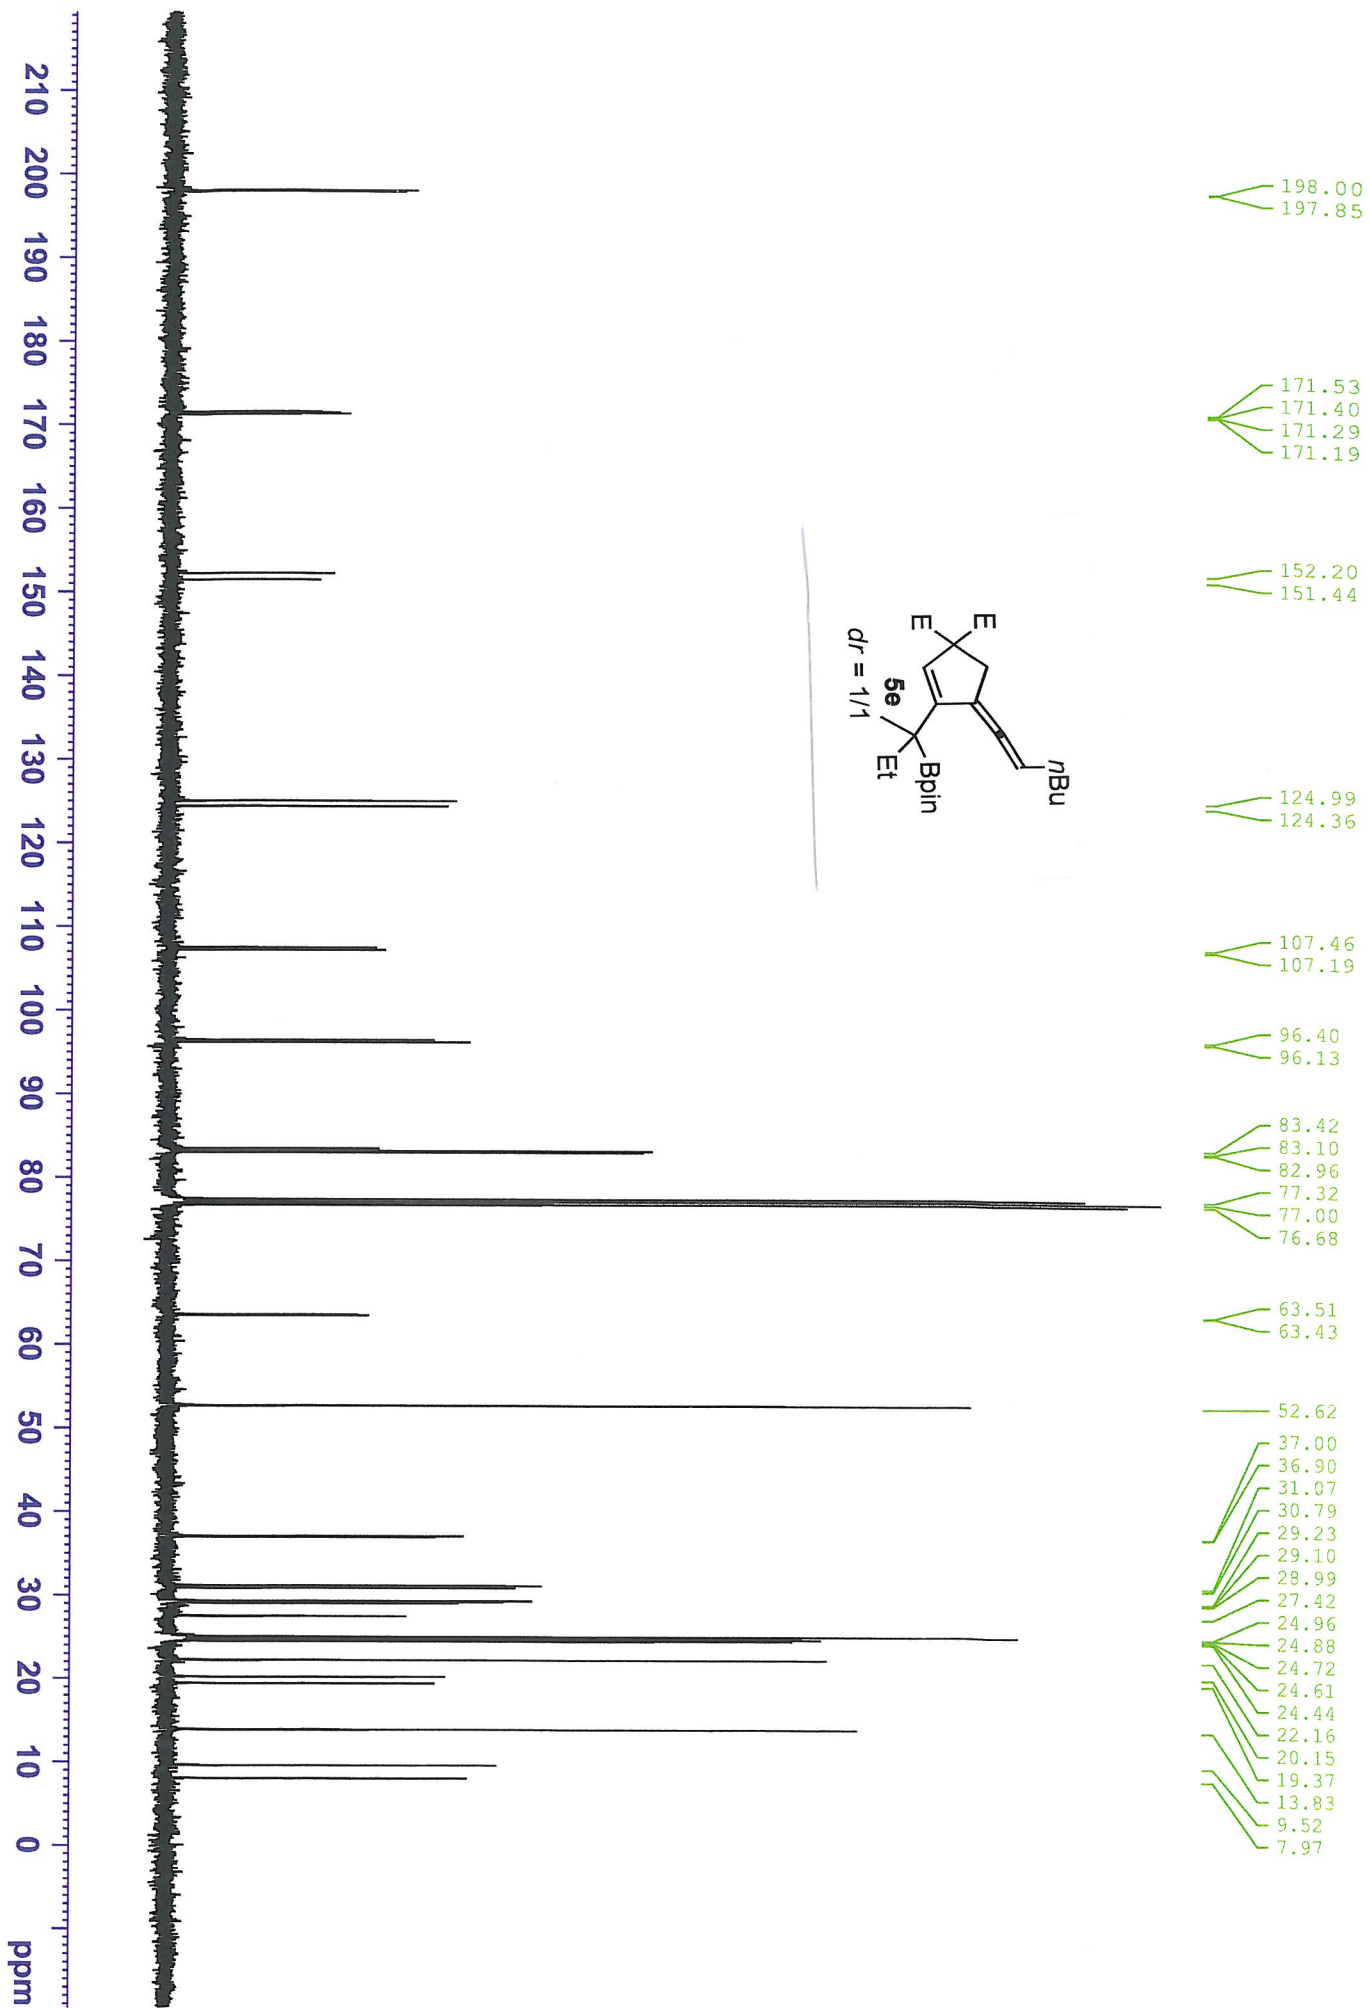

# Mass Spectrum SmartFormula Report

## Analysis Info

Analysis Name H:\Data2\Youqian\dyq-4-10000002.d  
Method tune\_wide\_dirk.m  
Sample Name dyq-4-10  
Comment

Acquisition Date 2012-05-28 17:22:21

Operator pia  
Instrument / Ser# micrOTOF 125

## Acquisition Parameter

|             |            |                      |          |                  |           |
|-------------|------------|----------------------|----------|------------------|-----------|
| Source Type | ESI        | Ion Polarity         | Positive | Set Nebulizer    | 0.4 Bar   |
| Focus       | Not active |                      |          | Set Dry Heater   | 180 °C    |
| Scan Begin  | 50 m/z     | Set Capillary        | 4500 V   | Set Dry Gas      | 4.0 l/min |
| Scan End    | 3000 m/z   | Set End Plate Offset | -500 V   | Set Divert Valve | Source    |

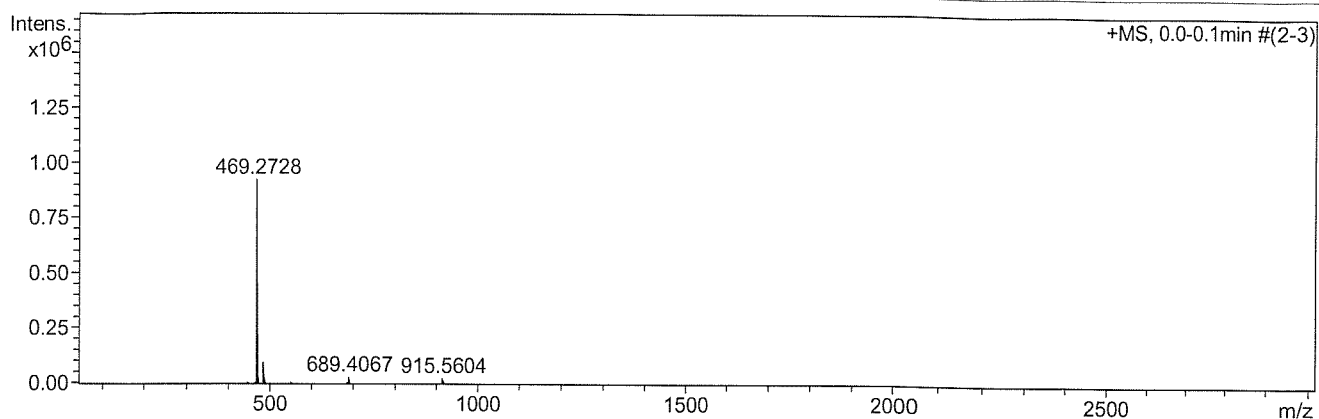

| Formula                                           | Meas. m/z | m/z      | err [ppm] | Mean err [ppm] |
|---------------------------------------------------|-----------|----------|-----------|----------------|
| C <sub>25</sub> H <sub>39</sub> BNaO <sub>6</sub> | 469.2728  | 469.2732 | 0.9       | 1.7            |

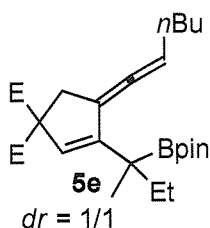

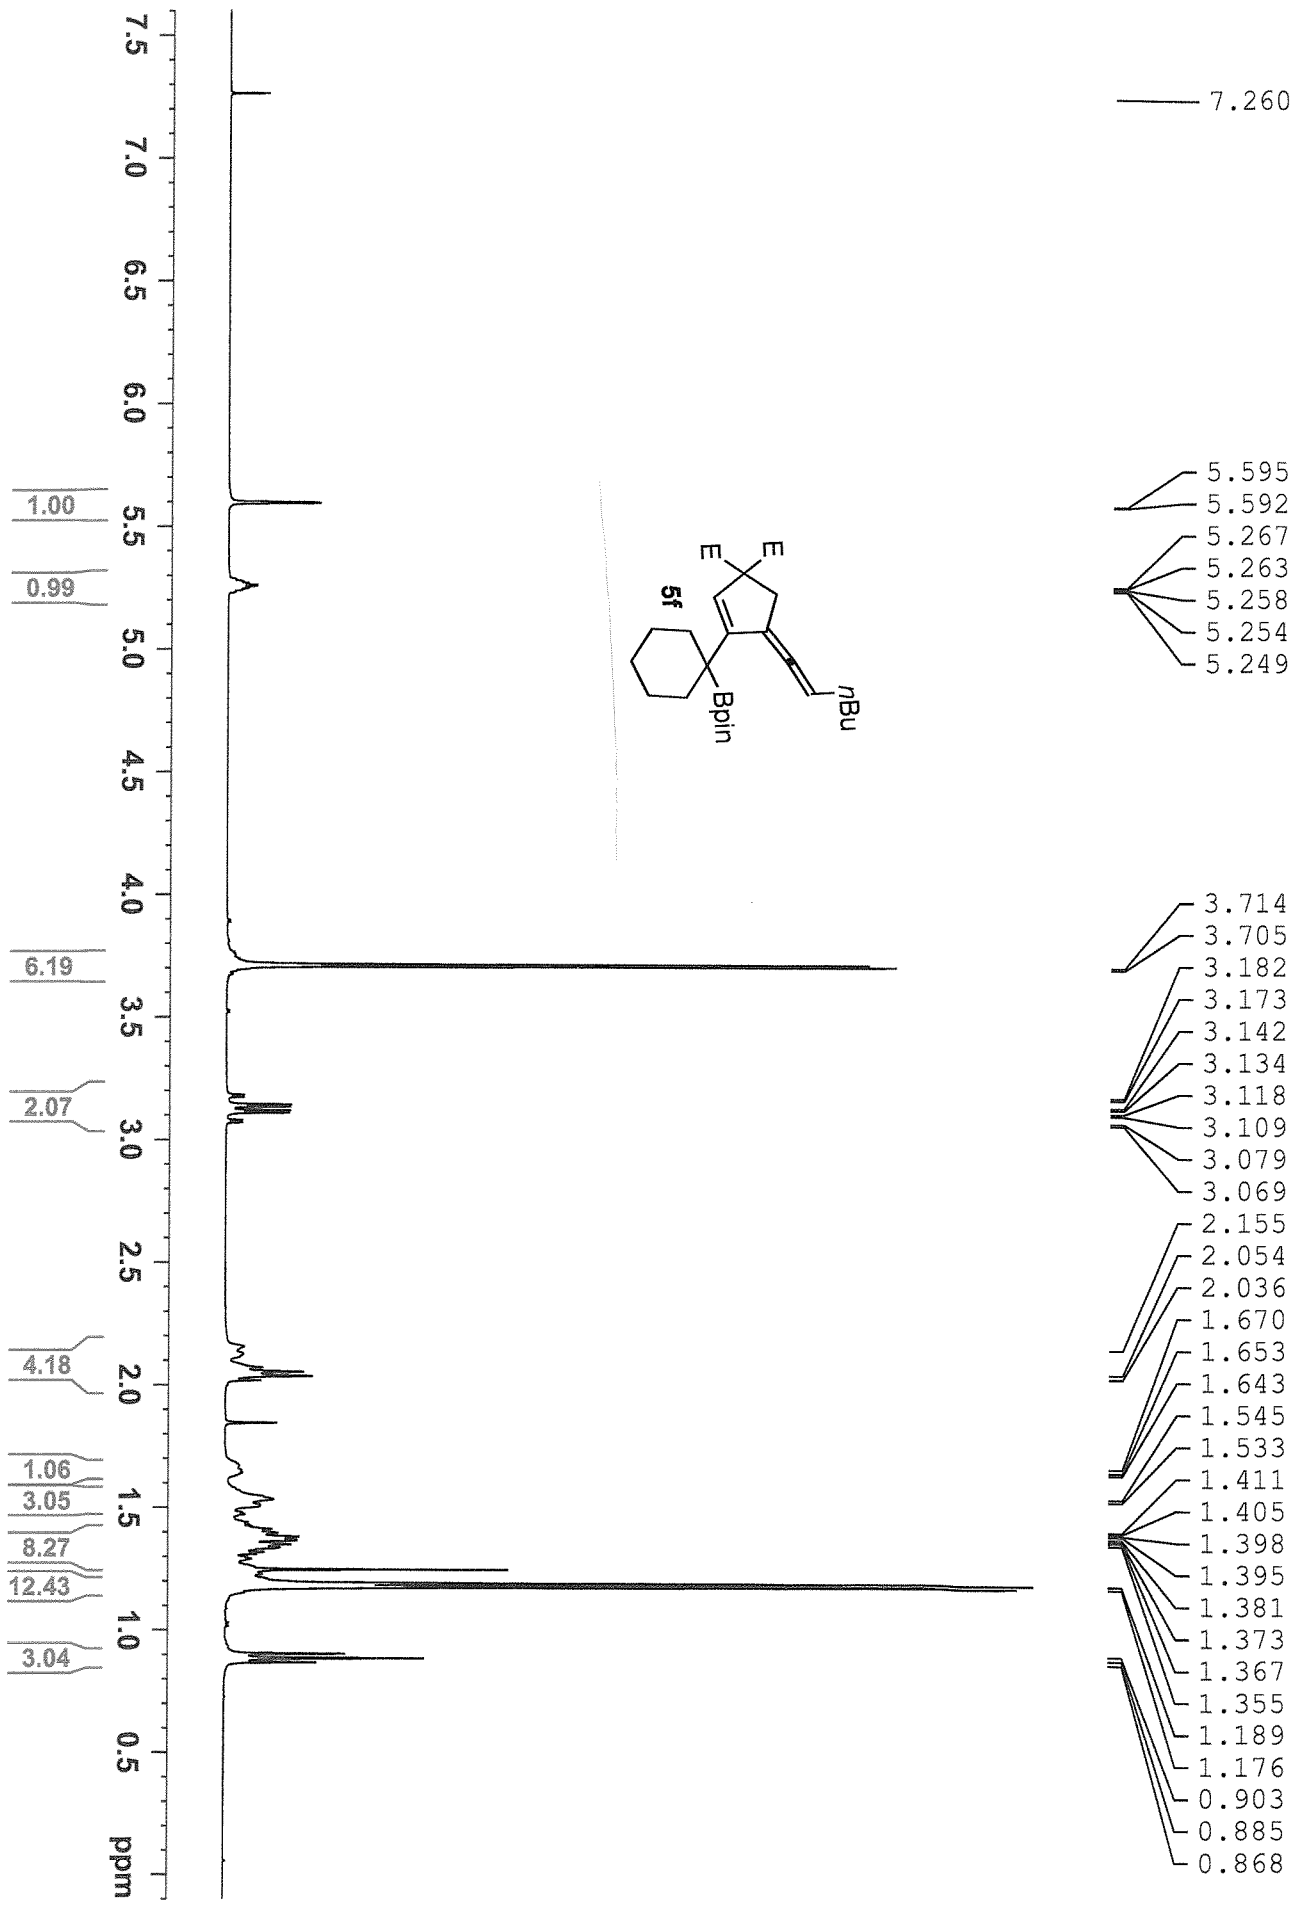

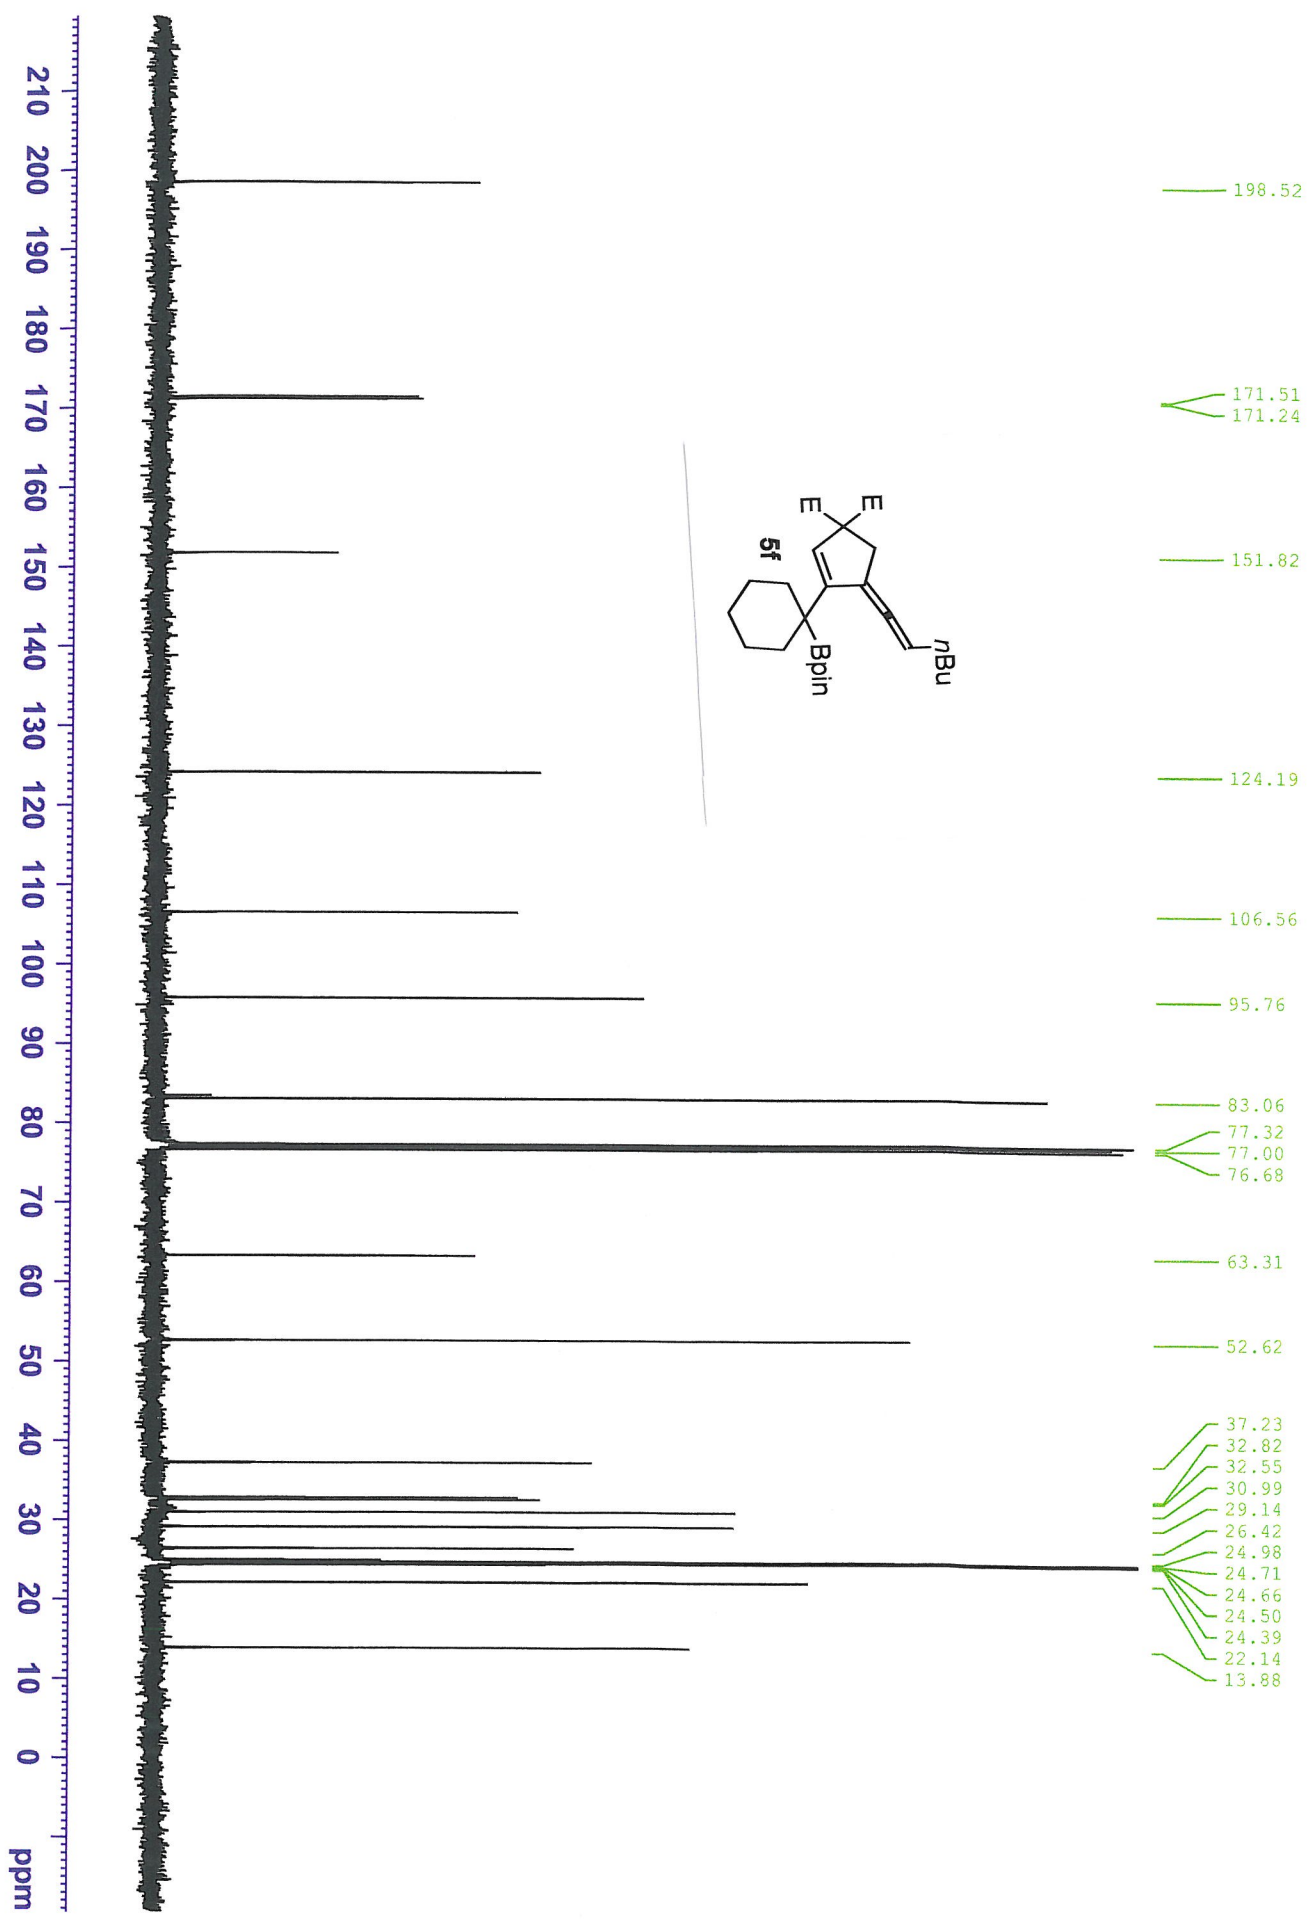

# Mass Spectrum SmartFormula Report

## Analysis Info

Analysis Name H:\Data2\Youqian\dyq-3-171000001.d  
Method tune\_wide\_dirk.m  
Sample Name dyq-3-171  
Comment

Acquisition Date 2012-04-27 18:34:57

Operator pia  
Instrument / Ser# microTOF 125

## Acquisition Parameter

|             |            |                      |          |                  |           |
|-------------|------------|----------------------|----------|------------------|-----------|
| Source Type | ESI        | Ion Polarity         | Positive | Set Nebulizer    | 0.4 Bar   |
| Focus       | Not active |                      |          | Set Dry Heater   | 180 °C    |
| Scan Begin  | 50 m/z     | Set Capillary        | 4500 V   | Set Dry Gas      | 4.0 l/min |
| Scan End    | 3000 m/z   | Set End Plate Offset | -500 V   | Set Divert Valve | Source    |

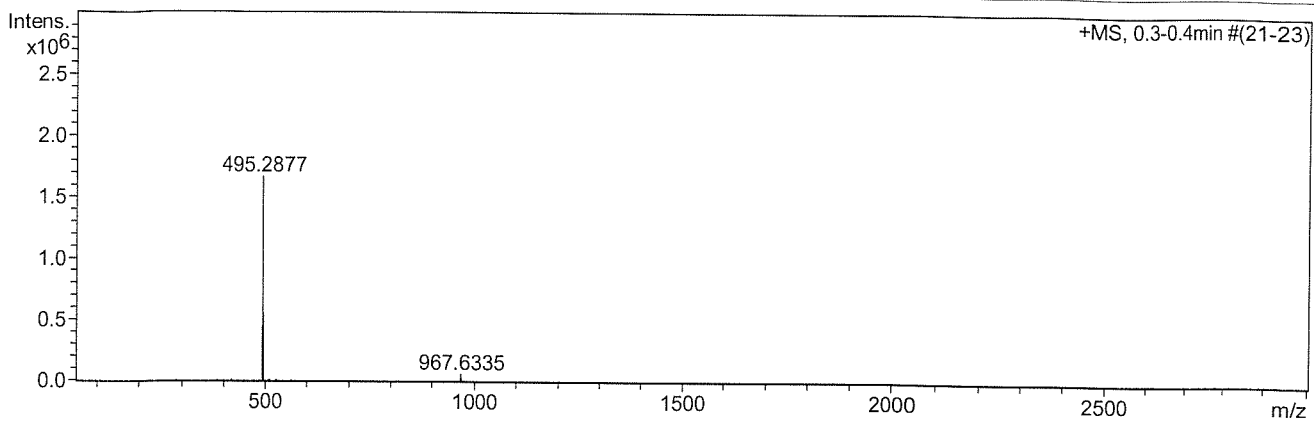

| Formula                                           | Meas. m/z | m/z      | err [ppm] | Mean err [ppm] |
|---------------------------------------------------|-----------|----------|-----------|----------------|
| C <sub>27</sub> H <sub>41</sub> BNaO <sub>6</sub> | 495.2877  | 495.2888 | 2.2       | 4.7            |

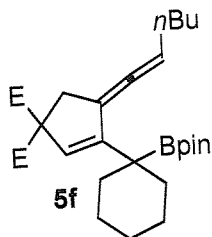

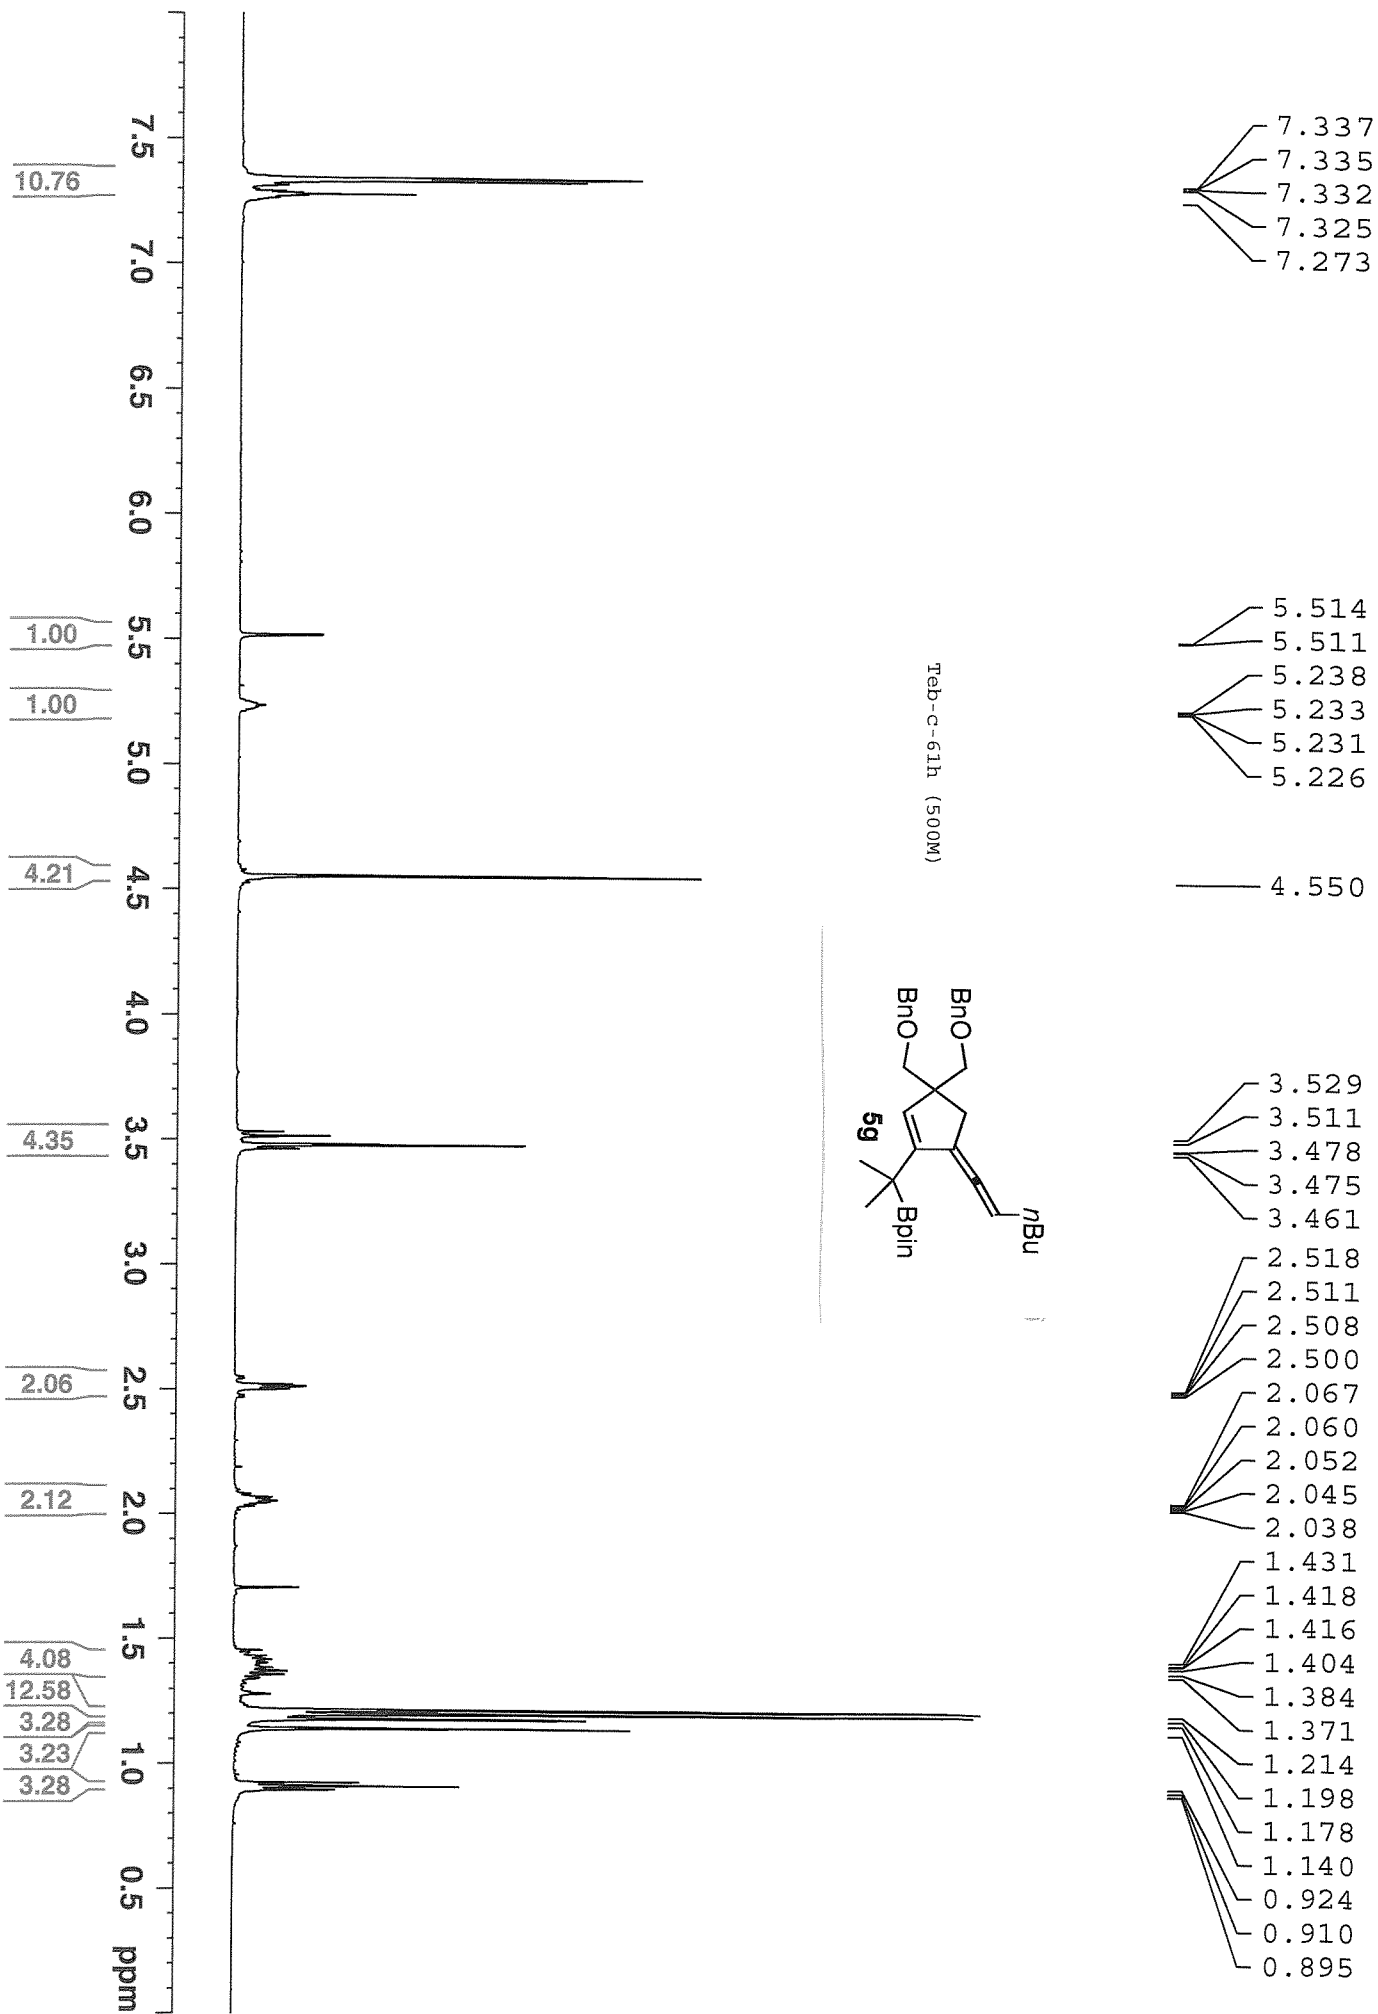



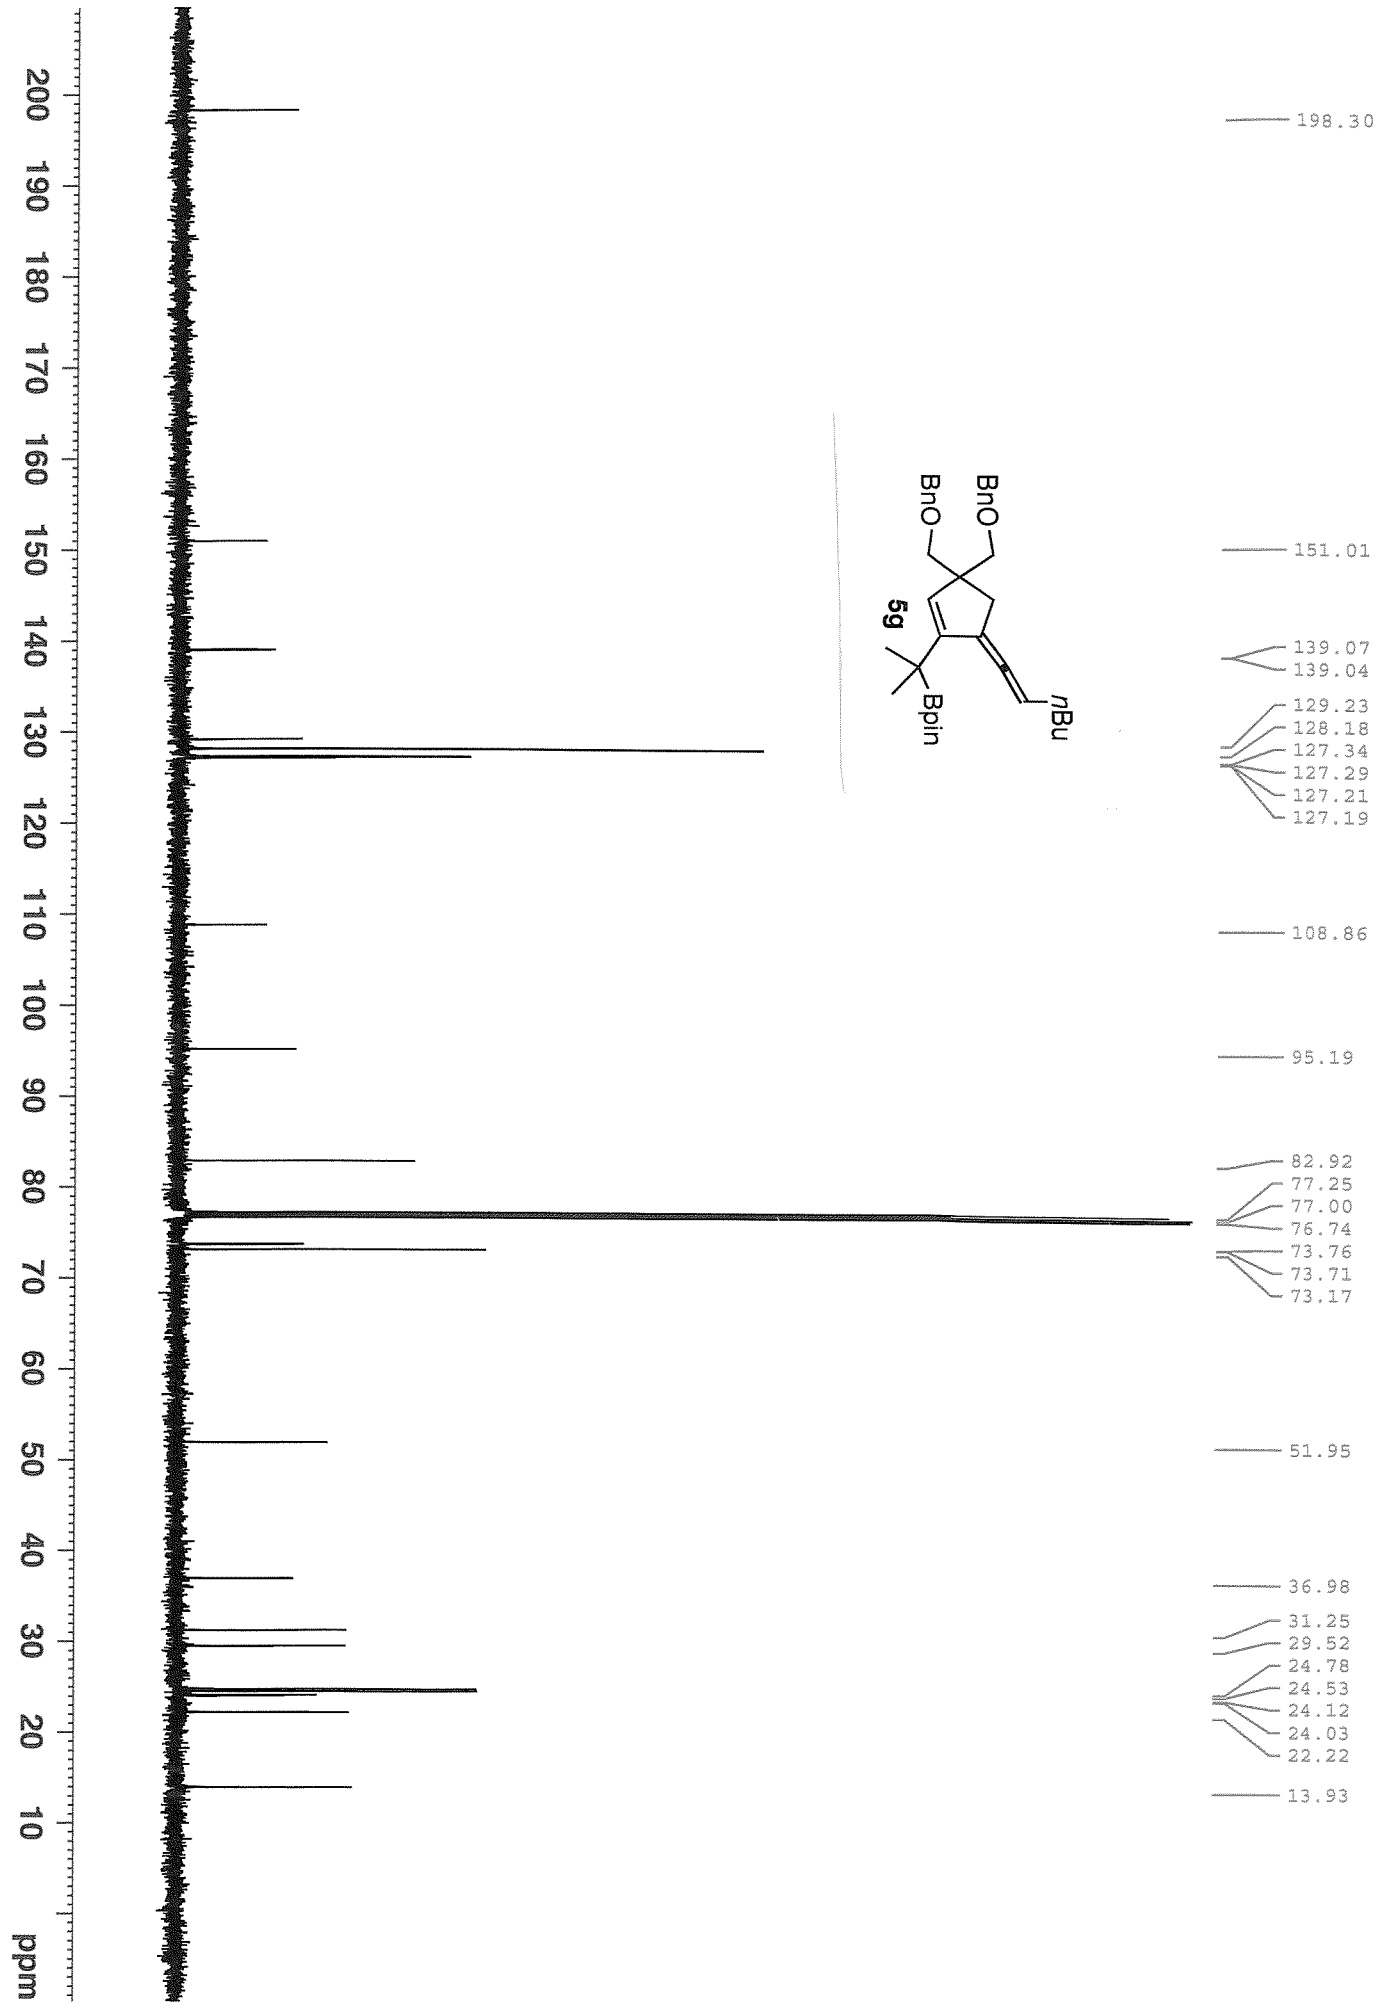

# Mass Spectrum SmartFormula Report

## Analysis Info

Analysis Name E:\Data2\Youqian\Teb-c-61000001.d  
Method Tune\_low\_pos.m  
Sample Name Teb-c-61  
Comment

Acquisition Date 2012-12-13 15:47:51

Operator Carin Larsson  
Instrument / Ser# micrOTOF 125

## Acquisition Parameter

|             |            |                      |          |                  |           |
|-------------|------------|----------------------|----------|------------------|-----------|
| Source Type | ESI        | Ion Polarity         | Positive | Set Nebulizer    | 0.4 Bar   |
| Focus       | Not active |                      |          | Set Dry Heater   | 180 °C    |
| Scan Begin  | 50 m/z     | Set Capillary        | 4000 V   | Set Dry Gas      | 4.0 l/min |
| Scan End    | 1000 m/z   | Set End Plate Offset | -500 V   | Set Divert Valve | Source    |

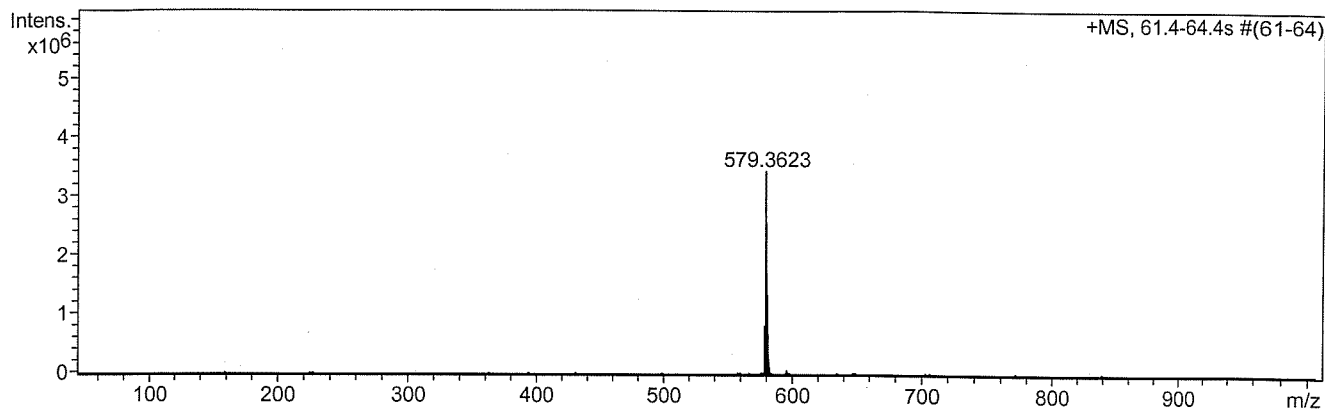

|                    |           |          |           |                |
|--------------------|-----------|----------|-----------|----------------|
| Formula            | Meas. m/z | m/z      | err [ppm] | Mean err [ppm] |
| C 36 H 49 B Na O 4 | 579.3623  | 579.3622 | -0.1      | 0.3            |

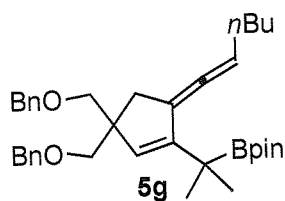

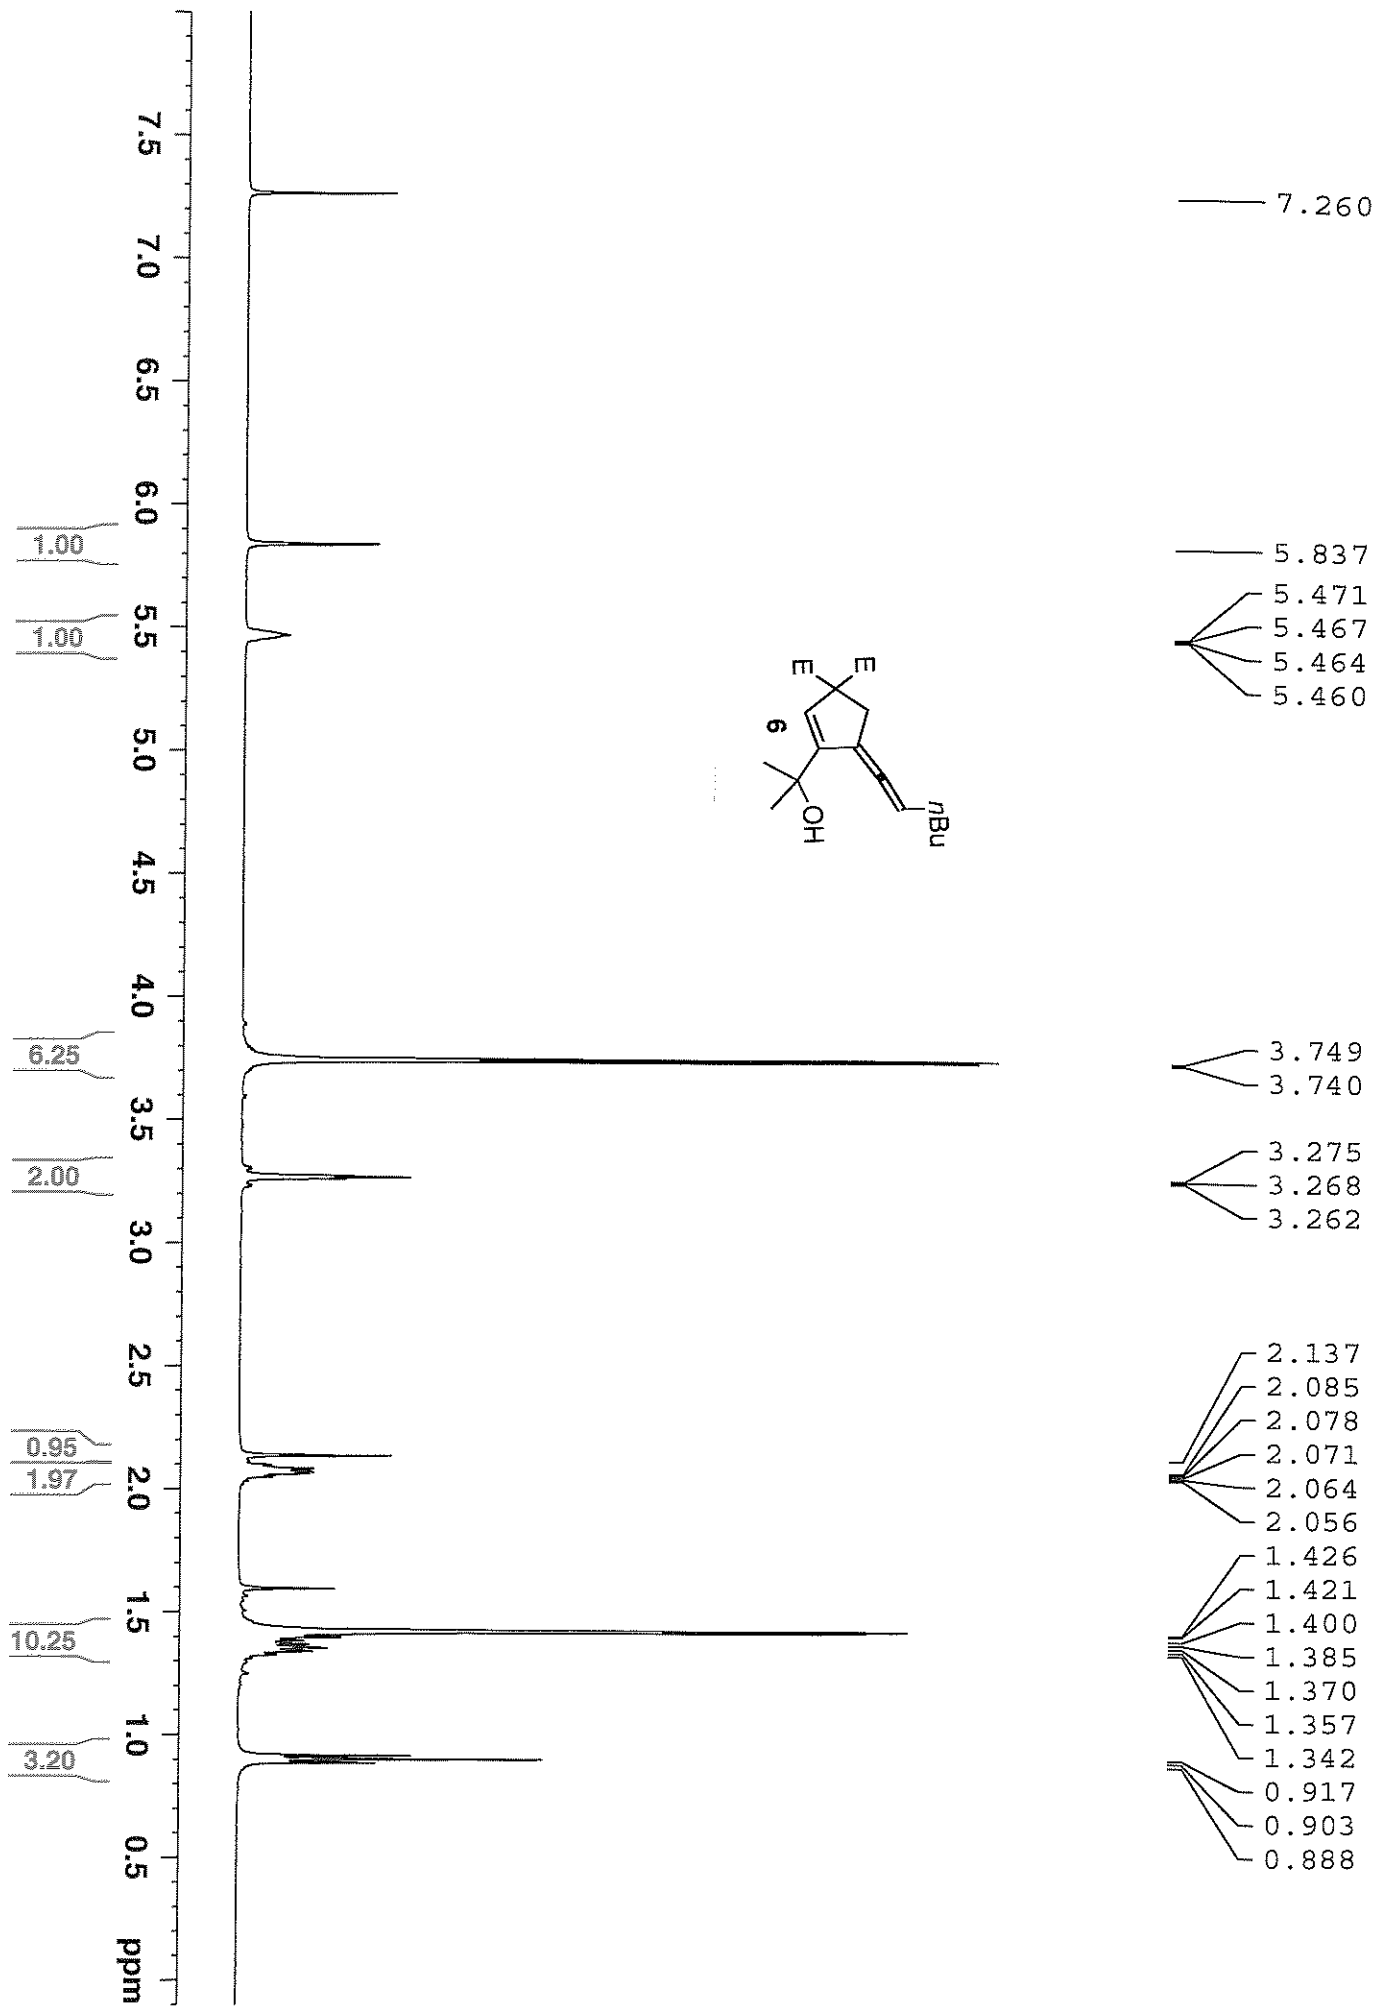

Supplement: anie0052-6283-SD1.pdf [file anie0052-6283-SD1.pdf]
